# Supplementary material for: Unraveling the transformative pathways of Au-NHC and Au-alkynyl complexes and bridging the gap between molecular and nanoscale gold systems
Source: Royal Society of Chemistry journal article supplement (doi:10.1039/d3qi02672h), 2024-01-01
Supplement: d3qi02672h1.pdf [file d3qi02672h1.pdf]

Supporting Information

**Unraveling the Transformative Pathways of Au-NHC and Au-Alkynyl Complexes and Bridging the Gap between Molecular and Nanoscale Gold Systems**

Mariya V. Grudova, Alexey S. Galushko, Valentina V. Ilyushenkova, Mikhail E. Minyaev,  
Artem N. Fakhrutdinov, Darya O. Prima and Valentine P. Ananikov\*

Zelinsky Institute of Organic Chemistry, Russian Academy of Sciences, Leninsky Pr. 47,  
Moscow, 119991, Russia; Email: val@ioc.ac.ru; <https://AnanikovLab.ru>

# Table of contents

|                                                                                                                 |     |
|-----------------------------------------------------------------------------------------------------------------|-----|
| 1. General experimental information .....                                                                       | S3  |
| 2. Experimental procedures .....                                                                                | S6  |
| 2.1. Synthesis of THT-AuCl.....                                                                                 | S6  |
| 2.2. Synthesis of IPrAuCl 1.....                                                                                | S6  |
| 2.3. General procedure for the synthesis of NHC-alkynyl gold(I) complexes 3a-e.....                             | S6  |
| 2.4. General procedure for synthesis gold complex 2.....                                                        | S6  |
| 2.5. General procedure for synthesis gold complex 4a.....                                                       | S7  |
| 3. Optimization conditions of 3a complex synthesis.....                                                         | S9  |
| 4. Product characterization .....                                                                               | S11 |
| (1,3-bis(2,6-diisopropylphenyl)-2,3-dihydro-1H-imidazol-2-yl)((4-(trifluoromethyl)phenyl)ethynyl)gold (3a)..... | S11 |
| (1,3-bis(2,6-diisopropylphenyl)-2,3-dihydro-1H-imidazol-2-yl)((4-(dimethylamino)phenyl)ethynyl)gold (3b).....   | S14 |
| (1,3-bis(2,6-diisopropylphenyl)-2,3-dihydro-1H-imidazol-2-yl)((4-ethoxyphenyl)ethynyl)gold (3c).....            | S16 |
| (1,3-bis(2,6-diisopropylphenyl)-2,3-dihydro-1H-imidazol-2-yl)(pent-1-yn-1-yl)gold (3d).....                     | S18 |
| (1,3-bis(2,6-diisopropylphenyl)-2,3-dihydro-1H-imidazol-2-yl)(pyridin-2-ylethynyl)gold (3e).....                | S20 |
| 1,3-bis(2,6-diisopropylphenyl)-1H-imidazol-3-ium bis((4-(trifluoromethyl)phenyl)ethynyl)aurate(I) (4a).....     | S25 |
| 5. Study of contaminated commercial reagents.....                                                               | S30 |
| 6. SEM/DFSTEM and EDX investigation of Au particles and nanoparticles .....                                     | S31 |
| 7. ESI-HRMS and NMR study of the deuteration pathway of gold complexes.....                                     | S42 |
| 8. ESI-HRMS study of the dynamic behavior of gold complexes .....                                               | S46 |
| 9. <sup>1</sup> H NMR study of the chemical properties of homoleptic gold complex 3.....                        | S55 |
| 10. TGA/DSC analysis of gold (I) complexes .....                                                                | S59 |
| 11. X-ray diffraction study of structures of gold(I) complexes .....                                            | S62 |
| 12. Summary of crystallographic data .....                                                                      | S68 |

## 1. General experimental information

### Chemicals and Solvents

Chemicals were obtained from P&M Invest, Sigma-Aldrich and Acros Organics and used as received without further purification. In the case of  $\text{HAuCl}_4 \cdot 3\text{H}_2\text{O}$ , crystallization from an ethanol/pentane mixture was implemented. Solvents were purified using distillation:  $\text{CH}_2\text{Cl}_2$  was distilled over  $\text{CaH}_2$ , hexane was distilled over 3 Å molecular sieves, and THF was distilled from sodium benzophenone ketyl. Ethanol and methanol were dried over 3 Å molecular sieves. Other solvents were purchased and used as received without further purification.

### Physical Measurements and Instrumentation

**ESI-HRMS study.** The samples for the ESI-TOF-HRMS experiments were prepared in 1.8 mL glass vials with screwtop caps fitted with Teflon-lined septa (Agilent Technologies).

High-resolution mass spectra (HRMS) were recorded on a Bruker maXis q-TOF (tandem quadrupole/time-of-flight mass analyzer) mass spectrometer equipped with an electrospray ionization (ESI) source. The  $m/z$  scanning range was 50–3000. The measurements were carried out in positive ion mode (+) (grounded spray needle, –4500 V high-voltage capillary; 500 V HV End Plate) and in negative ion mode (–) (grounded spray needle, +4000 V high-voltage capillary; –500 V HV End Plate Offset). External calibration of the mass scale was carried out using a low-concentration calibration solution “Tuning mix” (Agilent Technologies). Samples were injected using a 500  $\mu\text{L}$  Hamilton RN 1750 syringe (Switzerland). The flow rate during injection was controlled with a syringe pump (3  $\mu\text{L}/\text{min}$ ). Nitrogen was used as a nebulizer gas (1.0 bar) and dry gas (4.0 L/min, 200 °C). The data were processed using Bruker Data Analysis 4.0 software.

**NMR study.** NMR spectra were recorded using Bruker Avance-NEO 300, Bruker Fourier 300HD, Bruker Avance 400, Bruker Avance 500, Bruker Avance 600, spectrometers operating at 300.1, 400.16, 500.13, 600.13 MHz for  $^1\text{H}$ ; 61 MHz for  $^2\text{H}$ ; 76, 126, 151 MHz for  $^{13}\text{C}$  and 282.4 MHz for  $^{19}\text{F}$ .  $^1\text{H}$  and  $^{13}\text{C}$  NMR chemical shifts are reported relative to the solvent signals as internal standards: 2.50 ppm/39.5 ppm for  $\text{DMSO}-d_6$ , 7.26 ppm/77.2 ppm for  $\text{CDCl}_3$ , 5.32 ppm/54.0 ppm for  $\text{CD}_2\text{Cl}_2$ .  $^{19}\text{F}$  NMR chemical shifts are reported relative to  $\text{C}_6\text{F}_6$  ( $\delta^{19}\text{F} = -162.9$  ppm with respect to  $\text{CFCl}_3$ ). All measurements were performed at room temperature.

**SEM/DFSTEM analysis.** The sample morphology was studied using a Hitachi SU8000 (Hitachi High-Technologies Corporation, Hitachinaka-shi, Japan) scanning electron microscope and

Regulus8230 (Hitachi High-Technologies Corporation, Hitachinaka-shi, Japan) scanning electron microscope at a 2-10 kV accelerating voltage. The DFSTEM images were acquired in annular dark-field mode at a 30 kV accelerating voltage using a Regulus8230 (Hitachi) scanning electron microscope. EDX (energy-dispersive X-ray spectroscopy) studies were carried out using an Oxford Instruments X-max EDX system (Oxford Instruments plc, Abingdon, UK).

**X-ray crystallographic data and refinement details.** Crystal structures of **3a**, **3b**•CH<sub>2</sub>Cl<sub>2</sub>, **3c**•0.92(CH<sub>2</sub>Cl<sub>2</sub>) and **4a** have been determined by the X-ray diffraction analysis. Crystals of **3a** exists as two polymorph modifications: **3a-I** and **3a-II**. Crystals of **3e** usually contained several domains and mimic a centrosymmetric monoclinic space group.

X-ray diffraction data for **3a-I** and **3e** were collected at 100K on a four-circle Rigaku Synergy S diffractometer equipped with a HyPix6000HE area-detector (kappa geometry, shutterless  $\omega$ -scan technique), using monochromatized Mo K $\alpha$ -radiation (**3a-I**) and Cu K $\alpha$ -radiation (**3e**). The intensity data were integrated and corrected for absorption and decay by the CrysAlisPro program.<sup>1</sup> X-ray diffraction data for **3a-II** and **3b**•CH<sub>2</sub>Cl<sub>2</sub>, **3c**•0.92(CH<sub>2</sub>Cl<sub>2</sub>) and **4a** were collected at 100K on a Bruker Quest D8 diffractometer equipped with a Photon-III area-detector (shutterless  $\phi$ - and  $\omega$ -scan technique), using graphite-monochromatized Mo K $\alpha$ -radiation. The intensity data of collected reflections were integrated with the SAINT program<sup>2</sup> and semi-empirically corrected for absorption and decay from equivalent reflections by multi-scan methods with SADABS.<sup>3</sup> The structures were solved by direct methods using SHELXT<sup>4</sup> and refined by the full-matrix least-squares method on  $F^2$  using SHELXL-2018<sup>5</sup> in the OLEX2 program<sup>6</sup> (**3a-I** and **3e**) or in the SHELXTL program suite<sup>7</sup> (**3a-II**, **3b**•CH<sub>2</sub>Cl<sub>2</sub>, **3c**•0.92(CH<sub>2</sub>Cl<sub>2</sub>) and **4a**). All non-hydrogen atoms were refined with anisotropic displacement parameters. Hydrogen atoms were placed in ideal calculated positions (C-H distance = 0.950 Å for aromatic, 0.980 Å for methyl, 0.990 Å for methylene and 1.000 Å for tertiary hydrogen atoms) and refined as riding atoms with relative isotropic displacement parameters taken as  $U_{\text{iso}}(\text{H})=1.5U_{\text{eq}}(\text{C})$  for methyl groups and  $U_{\text{iso}}(\text{H})=1.2U_{\text{eq}}(\text{C})$  otherwise. A rotating group model was applied for methyl groups. The SHELXTL program suite<sup>7</sup> and Mercury program<sup>8</sup> were used for molecular graphics.

Crystal data, data collection and structure refinement details for **3a-I**, **3a-II**, **3b**•CH<sub>2</sub>Cl<sub>2</sub>, **3c**•0.92(CH<sub>2</sub>Cl<sub>2</sub>), **3e** and **4a** are summarized in Table S6 below. The structures have been deposited at the Cambridge Crystallographic Data Center with the reference CCDC numbers 2282626-2282629, 2321627 and 2282630; they also contain the supplementary crystallographic data. These data can be obtained free of charge from the CCDC via <https://www.ccdc.cam.ac.uk/structures/>



**Computation details.** The calculations were performed using the Gaussian 16 program<sup>9</sup> within the framework of density functional theory (DFT). A hybrid PBE1PBE functional<sup>10</sup> with the empirical Grimme correction<sup>11</sup> and Def2TZVP triple zeta valence basis set<sup>12</sup> were employed in this study. The polarizable continuum model (PCM)<sup>13</sup> was used to consider the solvent effect on the process under consideration. Stationary points were characterized as minima by evaluating the elements of the Hessian matrix.

## 2. Experimental procedures

### 2.1. Synthesis of THT-AuCl

THT-AuCl was obtained from  $\text{HAuCl}_4 \cdot 3\text{H}_2\text{O}$  and tetrahydrothiophene (THT) in EtOH-H<sub>2</sub>O medium as a white solid with 90% yield by the previously described procedure.<sup>14</sup>

### 2.2. Synthesis of IPrAuCl **1**

THT-AuCl was directly used for the synthesis of IPrAuCl **1** by following the procedure reported by L. Belpassi and coworkers.<sup>15</sup> It should be noted that the reaction vessel should be covered from sun lights and should not be airtight. The formation of metallic gold particles with different shapes, from pieces to balls, were observed whenever the reaction vessel was airtight and uncovered.

### 2.3. General procedure for the synthesis of NHC-alkynyl gold(I) complexes **3a-e**

NHC-AuCl **1** (1 eq, 0.03 mmol, 0.020 g) and the appropriate alkyne (1 eq, 0.03 mmol) were placed in a 5 mL vial. Then, the residue was dissolved in a 2 mL mixture of  $\text{CH}_2\text{Cl}_2$ :EtOH=2:1 (v/v). Then, AcONa (3 eq, 0.09 mmol) was added at once. The reaction mixture was stirred at r.t. for 18 h. Then, the reaction mixture was filtered through a filter paper, and the solvent was evaporated under reduced pressure. After that, the crude gold(I) complex was purified by flash-chromatography ( $\text{Al}_2\text{O}_3$ , eluent  $\text{CH}_2\text{Cl}_2$ :hexane = 1:4  $\rightarrow$  1:2). Target NHC-Au-alkynyl complexes were obtained as white or off-white powders with good yields.

Gold complexes **3f**<sup>16</sup>, **3g**<sup>17</sup>, and **3h**<sup>13</sup> were synthesized in accordance with previously described procedures.

### 2.4. General procedure for synthesis gold complex **2**

To a solution of 1,3-bis-(2,4,6-tribenzhydrylphenyl)-1H-imidazol-3-ium chloride (IPr\*HCl) (1 eq, 0.12 mmol, 0.050 g) in 3.3 mL of  $\text{CH}_2\text{Cl}_2$  chloro(tetrahydrothiophene)gold(I) (THT-AuCl) (1 eq, 0.12 mmol, 0.038 g) was added. The reaction mixture was sonicated in ultrasound bath for 1 min and then stirred for 15 min at room temperature. After 15 min, large part of solvent was evaporated from the resulting turbid solution under reduced pressure to 0.5

mL. Then 10 mL of Et<sub>2</sub>O was added. The resulting precipitate was filtered through a 3-pore Schott filter, washed with Et<sub>2</sub>O (3x2 mL) and dried under reduced pressure. The yield of the target product **2** was 0.062 g, 80%.

## 2.5. General procedure for synthesis gold complex **4a**

1-Ethynyl-4-(trifluoromethyl)benzene (2 eq, 0.03 mmol, 0.010 g, 10  $\mu$ L) and AcONa (2.1 eq, 0.062 mmol, 0.005 g) were placed in a 5 mL vial. Then, 2 mL of CH<sub>2</sub>Cl<sub>2</sub> were added to the vial. After that, NHC<sup>+</sup>[AuCl<sub>2</sub>]<sup>-</sup> **2** (1 eq, 0.03 mmol, 0.020 g) was added. The reaction mixture was stirred at room temperature for 18 h. Then, the mixture was filtered through a filter paper, and the solvent was evaporated under reduced pressure. Then, Et<sub>2</sub>O (5 mL) was added, and the reaction mixture was sonicated in ultrasound bath for 1 minute. Then, the residue was filtered through a Schott filter (3 porous) and dried with under reduced pressure. Target bis-alkynyl complex **4a** was obtained as an off-white (or yellowish) solid. Yield 42%.

## References

1. CrysAlisPro. Version 1.171.42. *Rigaku Oxford Diffraction*, 2023.
2. Bruker. APEX-III. *Bruker AXS Inc.*, Madison, Wisconsin, USA, 2020.
3. Krause, L.; Herbst-Irmer, R.; Sheldrick, G. M.; Stalke, D. Comparison of silver and molybdenum microfocus X-ray sources for single-crystal structure determination. *J. Appl. Cryst.* 2015, **48**, 3.
4. Sheldrick, G. M. SHELXT - Integrated space-group and crystal-structure determination. *Acta Cryst.* 2015, **A71**, 3.
5. Sheldrick, G. M. Crystal structure refinement with SHELXL. *Acta Cryst.* 2015, **C71**, 3.
6. Dolomanov O.V.; Bourhis L.J.; Gildea R.J.; Howard J.A.K.; Puschmann H. OLEX2: a complete structure solution, refinement and analysis program. *J. Appl. Cryst.* 2009, **42**, 339.
7. Sheldrick, G.M. A short history of SHELX. *Acta Cryst., Sect. A* 2008, **A64**, 112.
8. Macrae, C. F.; Sovago, I.; Cottrell, S. J.; Galek, P. T. A.; McCabe, P.; Pidcock, E.; Platings, M.; Shields, G. P.; Stevens, J. S.; Towler, M.; Wood, P. A. Mercury 4.0: from visualization to analysis, design and prediction. *J. Appl. Cryst.* 2020, **53**, 226.
9. M. J. Frisch, G. W. Trucks, H. B. Schlegel, G. E. Scuseria, M. A. Robb, J. R. Cheeseman, G. Scalmani, V. Barone, G. A. Petersson, H. Nakatsuji, X. Li, M. Caricato, A. V. Marenich, J. Bloino, B. G. Janesko, R. Gomperts, B. Mennucci, H. P. Hratchian, J. V. Ortiz, A. F. Izmaylov, J. L. Sonnenberg, D. Williams-Young, F. Ding, F. Lipparini, F. Egidi, J. Goings, B. Peng, A. Petrone, T. Henderson, D. Ranasinghe, V. G. Zakrzewski, J. Gao, N. Rega, G. Zheng, W. Liang,

M. Hada, M. Ehara, K. Toyota, R. Fukuda, J. Hasegawa, M. Ishida, T. Nakajima, Y. Honda, O. Kitao, H. Nakai, T. Vreven, K. Throssell Jr., J. A. Montgomery, J. E. Peralta, F. Ogliaro, M. J. Bearpark, J. J. Heyd, E. N. Brothers, K. N. Kudin, V. N. Staroverov, T. A. Keith, R. Kobayashi, J. Normand, K. Raghavachari, A. P. Rendell, J. C. Burant, S. S. Iyengar, J. Tomasi, M. Cossi, J. M. Millam, M. Klene, C. Adamo, R. Cammi, J. W. Ochterski, R. L. Martin, K. Morokuma, O. Farkas, J. B. Foresman and D. J. Fox, Gaussian 16, Revision C.01, Gaussian, Inc., Wallingford CT, 2016

10. C. Adamo and V. Barone, Toward reliable density functional methods without adjustable parameters: The PBE0 model, *J. Chem. Phys.*, 1999, **110**, 6158.

11. S. Grimme, S. Ehrlich and L. Goerigk, Effect of the damping function in dispersion corrected density functional theory, *J. Comput. Chem.*, 2011, **32**, 1456.

12. F. Weigend and R. Ahlrichs, Balanced basis sets of split valence, triple zeta valence and quadruple zeta valence quality for H to Rn: Design and assessment of accuracy, *Phys. Chem. Chem. Phys.*, 2005, **7**, 3297.

13. Scalmani G. and Frisch M. J. Continuous surface charge polarizable continuum models of solvation. I. General formalism, *J. Chem. Phys.*, 2010, **132**, 114110.

14. Rezsnyak C. E., Autschbach J., Atwood J. D. and Moncho S., Reactions of gold (III) complexes with alkenes in aqueous media: generation of bis-( $\beta$ -hydroxyalkyl) gold (III) complexes, *J. Coord. Chem.*, 2013, **66**, 1153.

15. Ciancaleoni G., Biasiolo L., Bistoni G., Macchioni A., Tarantelli F., Zuccaccia D. and Belpassi L., NHC-gold-alkyne complexes: Influence of the carbene backbone on the ion pair structure, *Organometallics*, 2013, **32**, 4444.

16. Scattolin T., Tzouras N. V., Falivene L., Cavallo L. and Nolan S. P., Using sodium acetate for the synthesis of [Au(NHC)X] complexes, *Dalton Trans.*, 2020, **49**, 9694.

17. Oberkofler J., Aikman B., Bonsignore R., Pöthig A., Platts J., Casini A. and Kühn F. E., Exploring the Reactivity and Biological Effects of Heteroleptic *N*-Heterocyclic Carbene Gold (I)-Alkynyl Complexes. *Eur. J. Inorg. Chem.*, 2020, **2020**, 1040.

### 3. Optimization conditions of **3a** complex synthesis

First of all, the formation of *N*-heterocyclic gold(I) alkynyl complex **3a** was studied. The influence of external parameters on the yield of target complex **3a** was investigated. To obtain IPr-Au-alkynyl complex **3a** the strong base route (KOH, *t*-BuOK, Entries 1-2 in Table S1) and the weak base route (Et<sub>3</sub>N, AcONa, Entries 3-4 in Table S1) were performed.

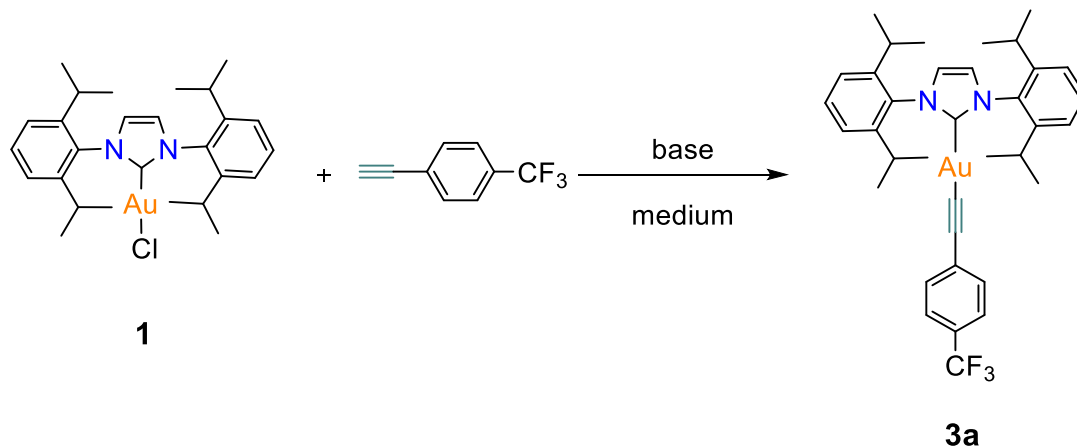

**Table S1.** Optimization of the model reaction conditions for the synthesis of the NHC-alkynyl gold(I) complex. Reaction conditions: 18 h, r.t., **1** (0.03 mmol), alkyne (0.03 mmol), base (0.1 mmol). Isolated yields reported.

| Entry    | Base              | Medium                                          | Yield of <b>3a</b> , % |
|----------|-------------------|-------------------------------------------------|------------------------|
| 1        | KOH               | EtOH: CH <sub>2</sub> Cl <sub>2</sub> = 1:1     | 19                     |
| 2        | <i>t</i> -BuOK    | EtOH: CH <sub>2</sub> Cl <sub>2</sub> = 1:1     | 44                     |
| 3        | Et <sub>3</sub> N | EtOH: CH <sub>2</sub> Cl <sub>2</sub> = 1:1     | 59                     |
| <b>4</b> | <b>AcONa</b>      | <b>EtOH: CH<sub>2</sub>Cl<sub>2</sub> = 1:1</b> | <b>75</b>              |
| 5        | Without base      | CH <sub>2</sub> Cl <sub>2</sub>                 | –                      |
| 6        | AcONa             | EtOH                                            | 35                     |
| 7        | AcONa             | MeOH: CH <sub>2</sub> Cl <sub>2</sub> = 1:1     | 57                     |
| 8        | AcONa             | MeOH                                            | 55                     |
| <b>9</b> | <b>AcONa</b>      | <b>CH<sub>2</sub>Cl<sub>2</sub></b>             | <b>74</b>              |
| 10       | AcONa             | THF                                             | 15                     |
| 11       | AcONa             | Benzene                                         | 27                     |

The formation of gold NPs and Au black in the case of the strong base route (Entries 1-2, Table S1) were discovered. At the same time, the yield of the target complex **3a** was not high. Therefore, the largest part of the gold(I) complexes was consumed into gold NPs and Au black formation. After that the influence of weak base route was investigated. Replacing *O*-containing base with an *N*-containing base did not result in an increase in conversion (Entry 3, Table S1). The formation

of two gold(I) complexes was established by NMR, ESI-HRMS and X-ray diffraction study (Entries 6-8, Table S1) when AcONa was used as a base. The reaction between equimolar amounts of IPrAuCl **1** and appropriate alkyne without any base did not occur by  $^1\text{H}$  NMR monitoring (Entry 5, Table S1).

After that the solvents effect was investigated (Entries 6-11, Table S1). Replacing the solvent with a less polar solvent did not increase the conversion and the yield of target complex **3a** (Entries 6-8, 10-11, Table S1). The yield of the complex **3a** increased by up to 74% when the solvent was switched out for the less polar solvent  $\text{CH}_2\text{Cl}_2$  (Entry 9, Table S1). Following that, complex **3a** was synthesized in a  $\text{CH}_2\text{Cl}_2$  medium using AcONa as a base. However, IPrAuCl **1** was not fully converted. After that the  $^1\text{H}$  NMR spectra of reaction mixtures were compared with  $^1\text{H}$  NMR spectrum started alkyne. It was stand that when reaction was carried out in DCM only did not full conversion were observed. The 3.20 ppm NMR shift (in  $\text{CDCl}_3$  as a solvent) which corresponds to initial alkyne was fixed in  $^1\text{H}$  NMR spectrum of DCM reaction mixture. At the same time, in DCM:EtOH mixture almost none 3.20 ppm NMR shift was established. The full conversion in DCM was not observed, probably, due to the poor solubility of AcONa in dichloromethane. In the case of DCM:EtOH mixture the partial solubility of AcONa was stand. Therefore, AcONa as the base and  $\text{CH}_2\text{Cl}_2/\text{EtOH}$  as the medium have been chosen for the synthesis of Au(I) complexes **3a-f**.

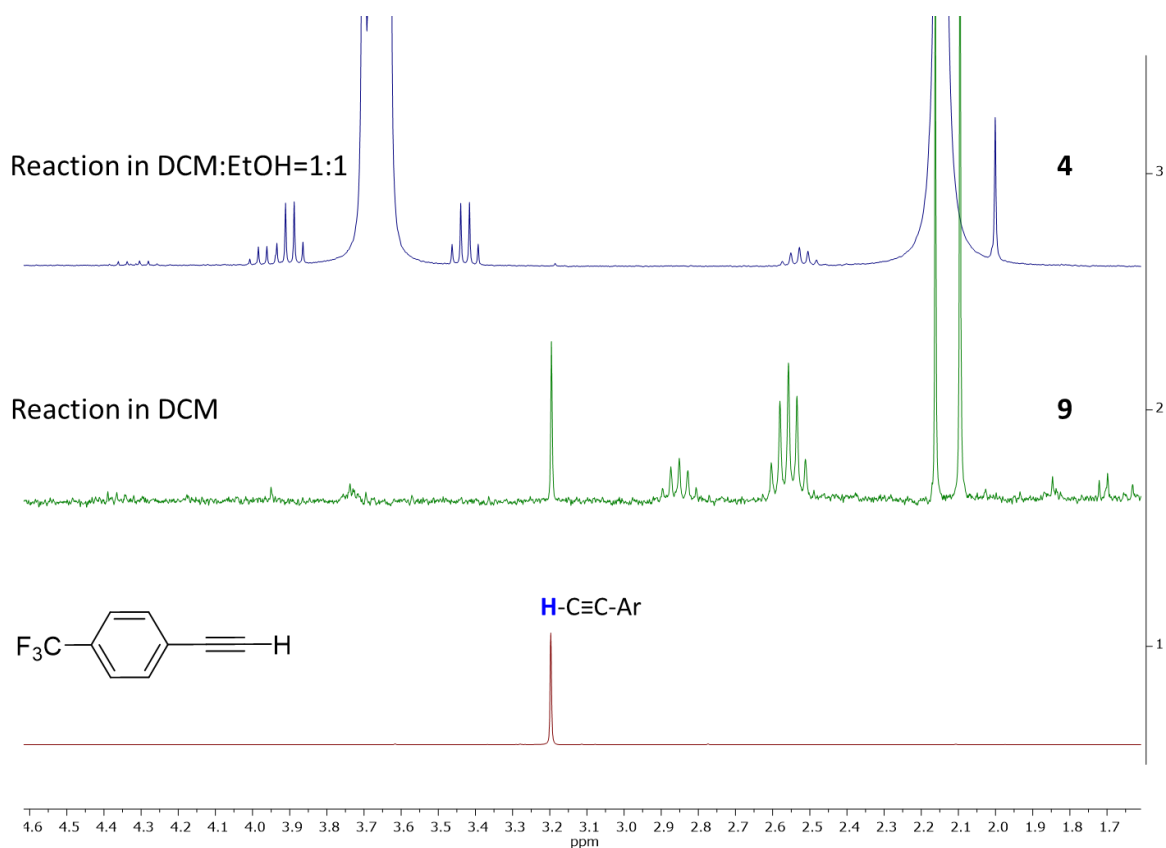

**Scheme S1.**  $^1\text{H}$  NMR spectra of investigated reactions, solvent  $\text{CDCl}_3$ , 300 MHz of initial alkyne and studied reaction in: **4**) DCM:EtOH=1:1 (v/v); **9**) DCM.

## 4. Product characterization

(1,3-bis(2,6-diisopropylphenyl)-2,3-dihydro-1H-imidazol-2-yl)((4-(trifluoromethyl)phenyl)ethynyl)gold (**3a**). Yield 70% (Yield 55% when base=*t*-BuOK), white powder.

$^1\text{H}$  NMR ( $\text{CDCl}_3$ , 300 MHz):  $\delta$  7.55 – 7.47 (t,  $J = 7.8$  Hz, 2H), 7.39 – 7.32 (m, 4H), 7.30 (d,  $J = 7.8$  Hz, 4H), 7.13 (s, 2H), 2.60 (sept,  $J = 6.9$  Hz, 4H), 1.38 (d,  $J = 6.9$  Hz, 12H), 1.22 (d,  $J = 6.9$  Hz, 12H).

$^{13}\text{C}\{^1\text{H}\}$  NMR ( $\text{CD}_2\text{Cl}_2$ , 126 MHz):  $\delta$  190.7, 146.4, 134.8, 134.3, 132.5, 131.1, 130.80 (d,  $J_{\text{C-F}} = 1.4$  Hz), 127.60 (q,  $J_{\text{C-F}} = 32.2$  Hz), 125.21 (q,  $J_{\text{C-F}} = 3.8$  Hz), 125.0 ( $\text{CF}_3$ , q,  $J_{\text{C-F}} = 271.5$  Hz), 124.8, 124.1, 102.5, 29.4, 24.9, 24.2.

$^{19}\text{F}\{^1\text{H}\}$  NMR ( $\text{CDCl}_3$ , 282 MHz):  $\delta$  -65.60.

ESI-(+)HRMS,  $m/z$ : 755.2890, calcd for  $\text{C}_{36}\text{H}_{40}\text{AuF}_3\text{N}_2$ : 755.2882 [ $\text{M}+\text{H}$ ] $^+$ , ( $\Delta = 1.06$  ppm).

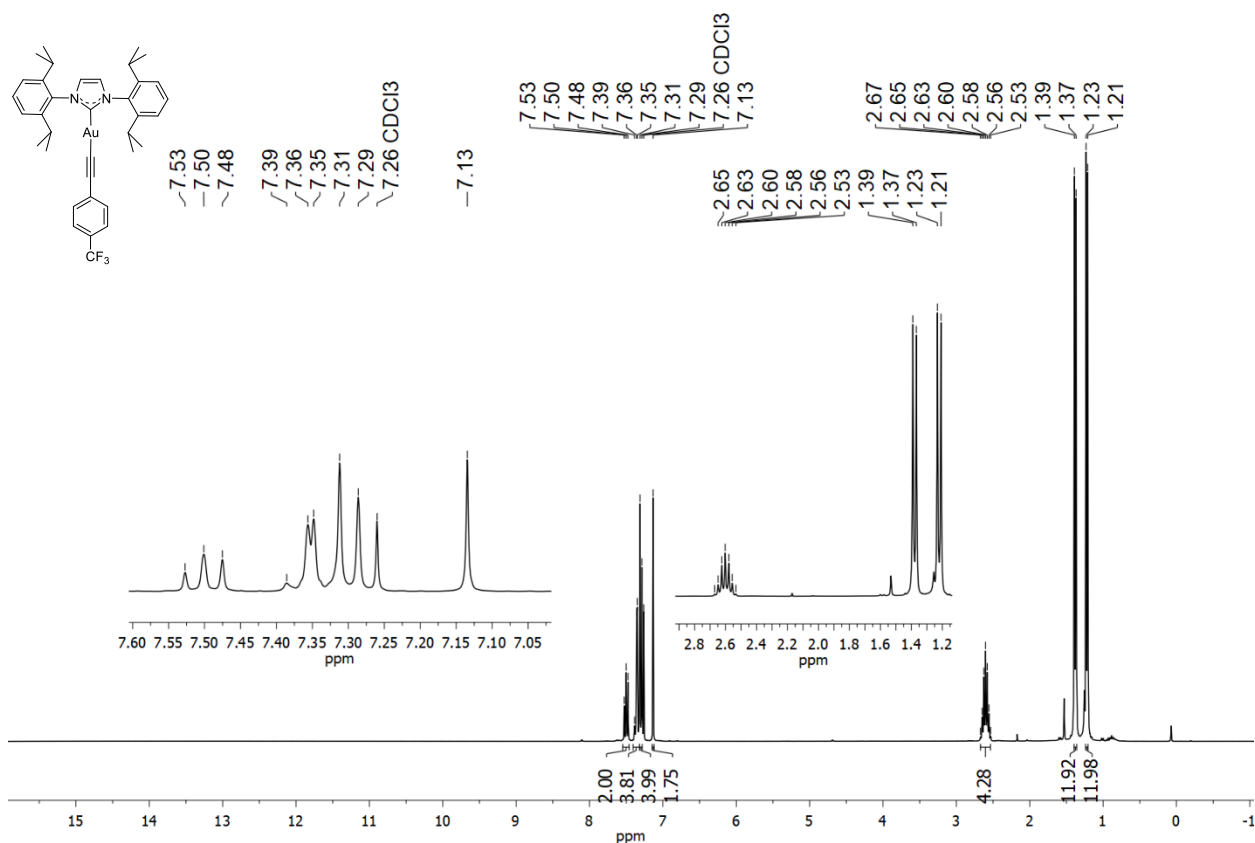

**Figure S1.**  $^1\text{H}$  NMR spectrum of compound **3a** ( $\text{CDCl}_3$ , 300 MHz).

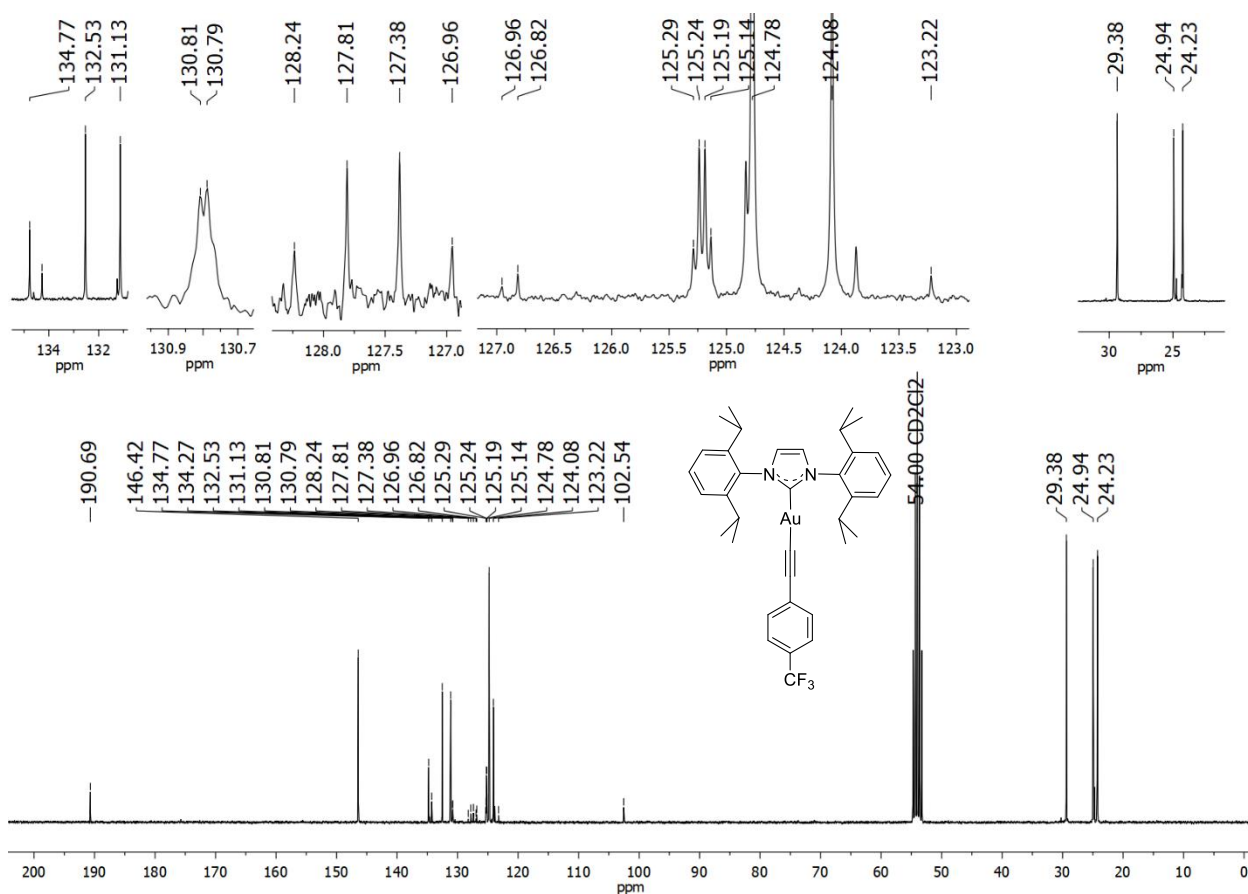

**Figure S2.**  $^{13}\text{C}\{^1\text{H}\}$  NMR spectrum of compound **3a** ( $\text{CD}_2\text{Cl}_2$ , 126 MHz).

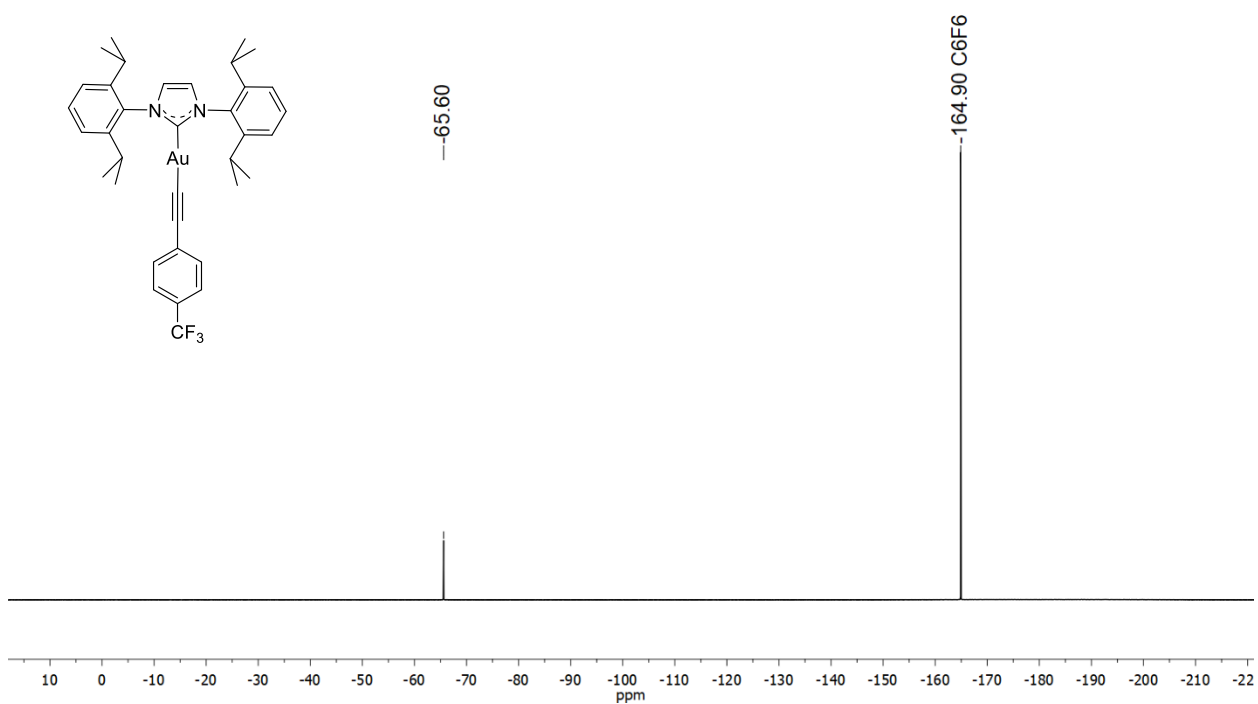

**Figure S3.**  $^{19}\text{F}\{^1\text{H}\}$  NMR spectrum of compound **3a** ( $\text{CDCl}_3$ , 282 MHz). Standard:  $\text{C}_6\text{F}_6$  with respect to  $\text{CFCl}_3$ .



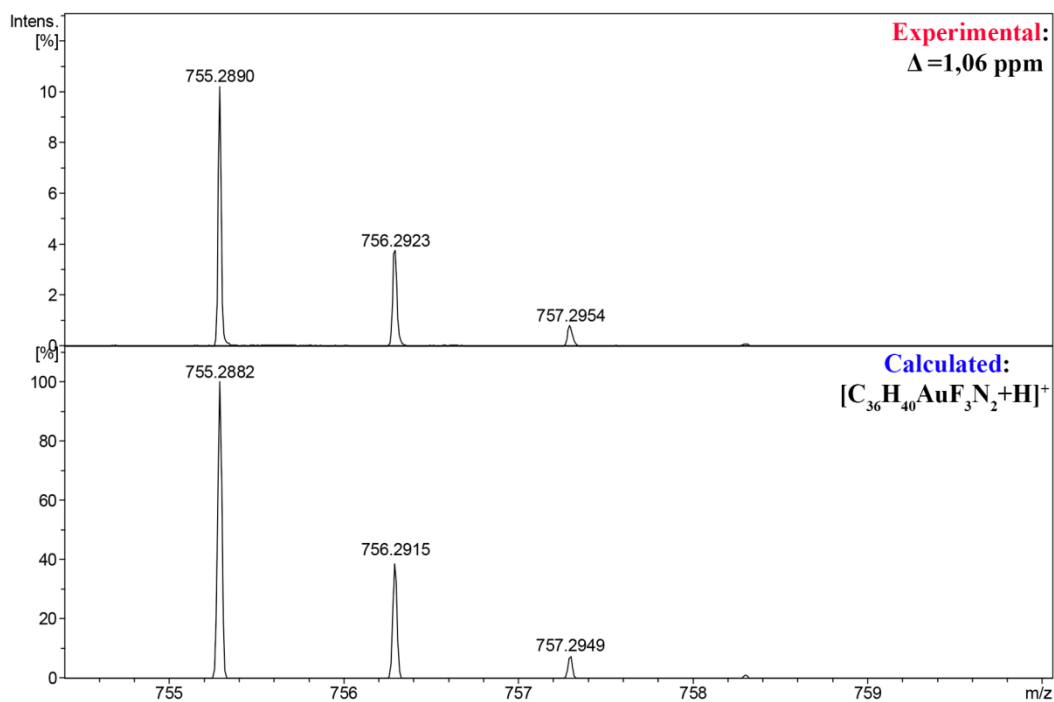

**Figure S4.** Experimental and theoretical ESI-(+)HRMS spectrum of **3a** in CH<sub>3</sub>CN solution: experimental peak [M+H]<sup>+</sup> = 755.2890 Da, calculated for C<sub>36</sub>H<sub>40</sub>AuF<sub>3</sub>N<sub>2</sub> = 755.2882, Δ = 1.06 ppm.

**(1,3-bis(2,6-diisopropylphenyl)-2,3-dihy(1,3-bis(2,6-diisopropylphenyl)-2,3-dihydro-1H-imidazol-2-yl)((4-(dimethylamino)phenyl)ethynyl)gold (3b).** Yield 78% (Yield 57% when base = *t*-BuOK), white powder.

$^1\text{H}$  NMR ( $\text{CDCl}_3$ , 300 MHz):  $\delta$  7.48 (t,  $J = 7.7$  Hz, 2H), 7.28 (d,  $J = 7.8$  Hz, 4H), 7.19 (d,  $J = 8.7$  Hz, 2H), 7.10 (s, 2H), 6.48 (d,  $J = 8.7$  Hz, 2H), 2.86 (s, 2H), 2.60 (sept,  $J = 6.6$  Hz, 4H), 1.38 (d,  $J = 6.8$  Hz, 12H), 1.20 (d,  $J = 6.9$  Hz, 12H).

$^{13}\text{C}\{^1\text{H}\}$  NMR ( $\text{CDCl}_3$ , 76 MHz):  $\delta$  191.6, 148.8, 145.8, 134.6, 133.3, 130.6, 124.4, 124.3, 123.3, 114.0, 111.9, 104.4, 40.6, 29.0, 24.8, 24.2.

ESI-(+)HRMS,  $m/z$ : 730.3447, calcd for  $\text{C}_{37}\text{H}_{46}\text{AuN}_3$ : 730.3430  $[\text{M}+\text{H}]^+$ , ( $\Delta = 2,32$  ppm).

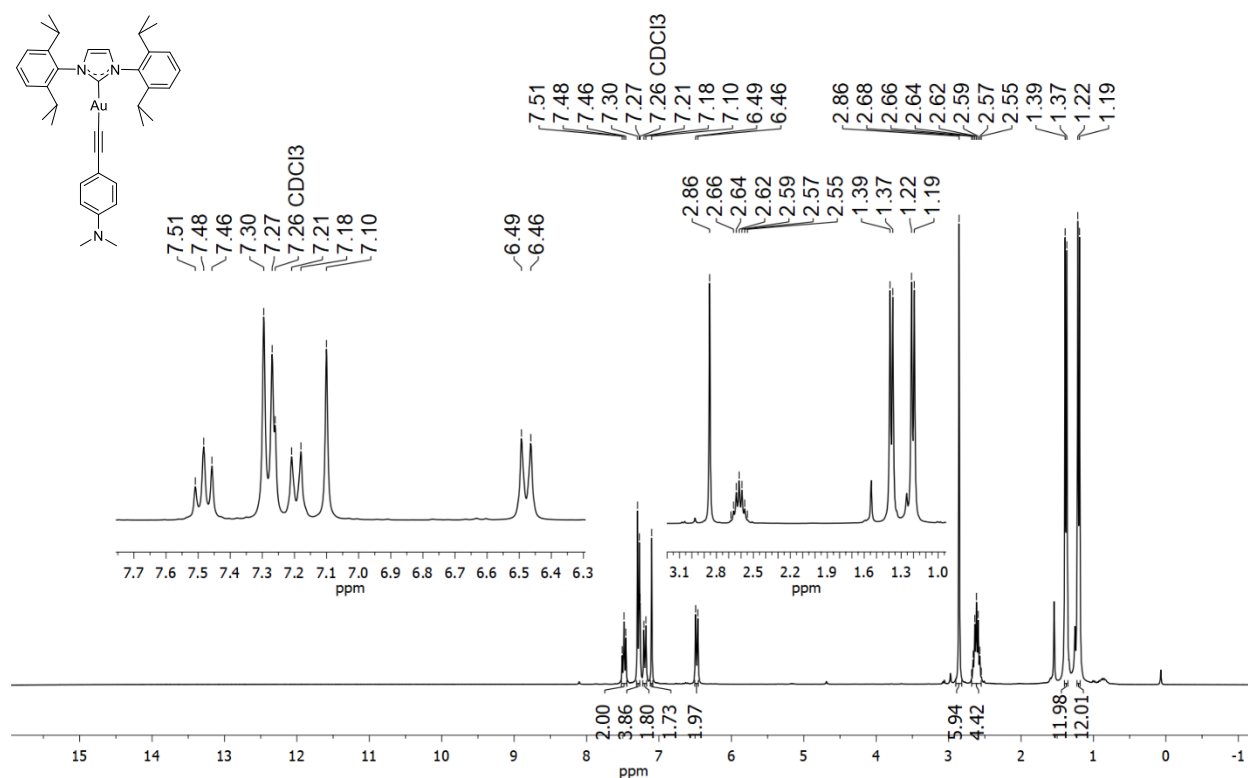

**Figure S5.**  $^1\text{H}$  NMR spectrum of compound **3b** ( $\text{CDCl}_3$ , 300 MHz).

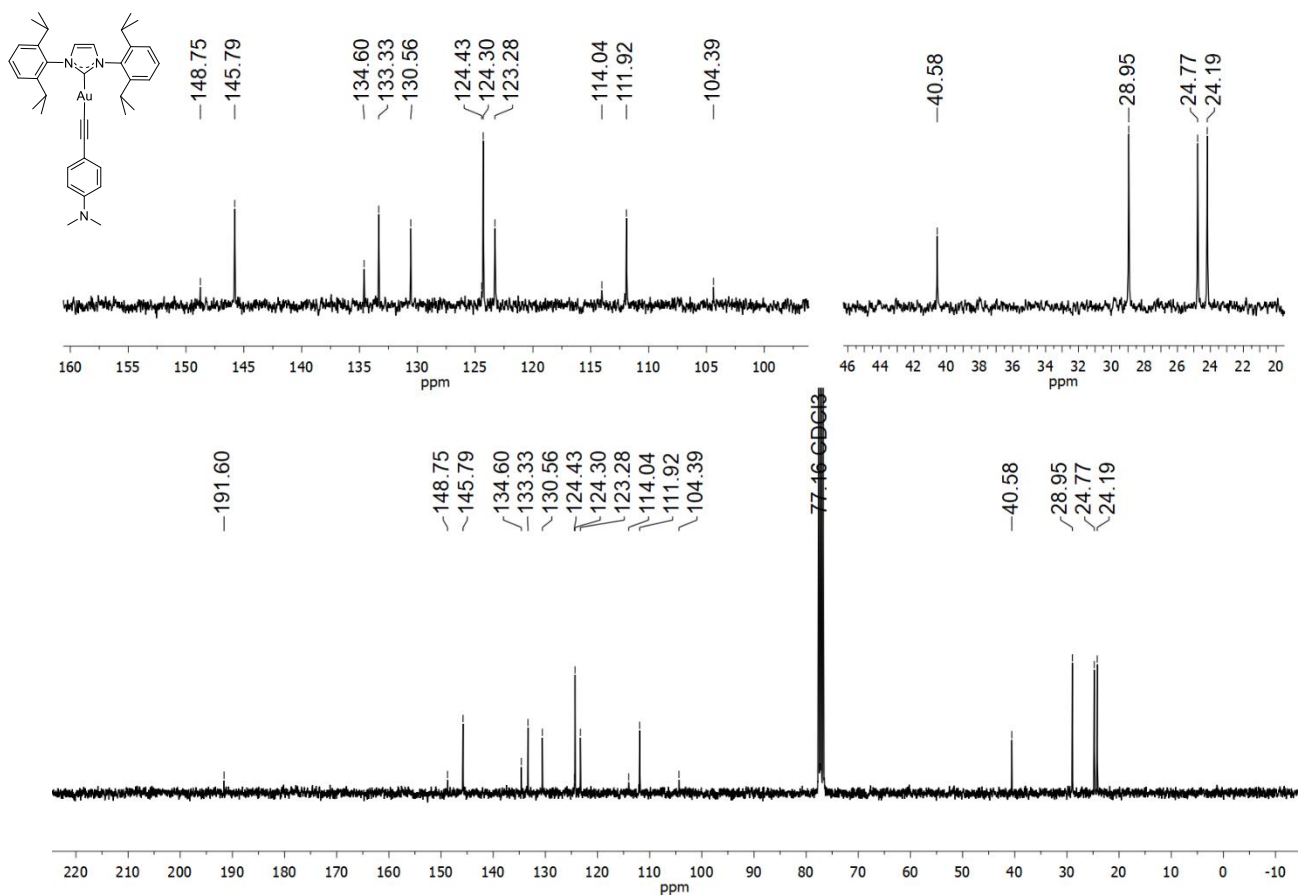

**Figure S6.**  $^{13}\text{C}\{^1\text{H}\}$  NMR spectrum of compound **3b** ( $\text{CDCl}_3$ , 76 MHz).

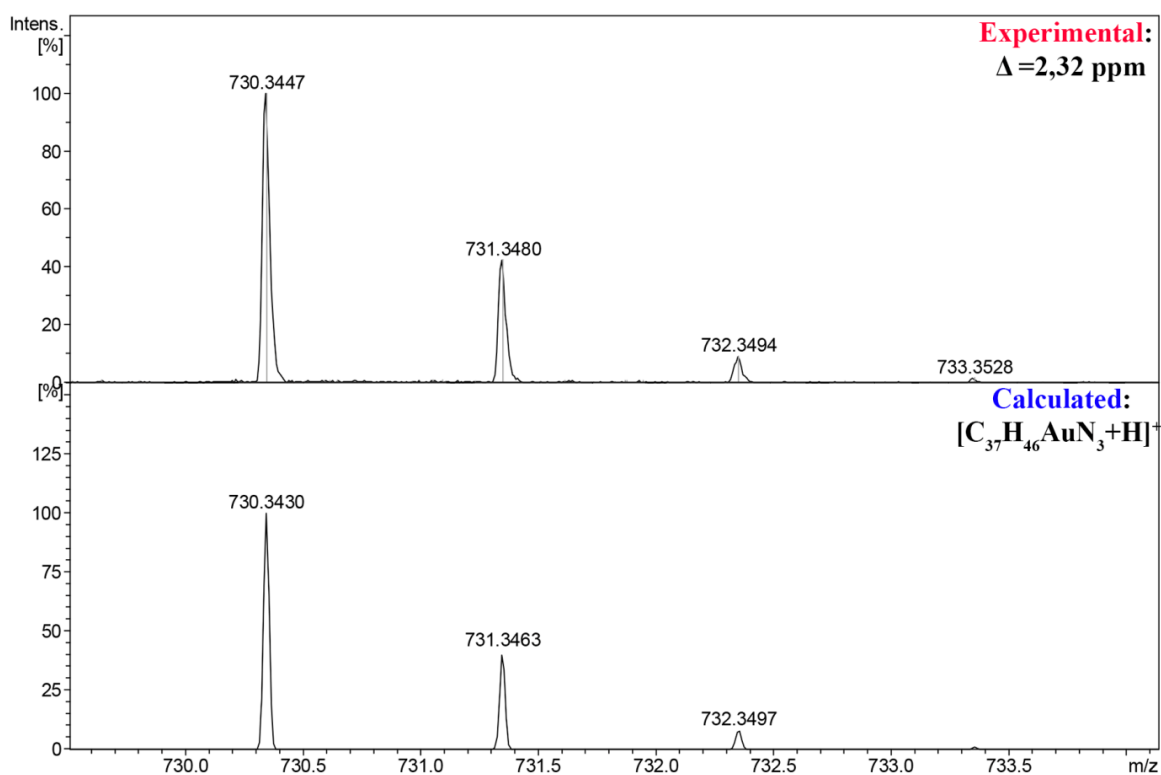

**Figure S7.** Experimental and theoretical ESI-(+)HRMS spectrum of **3b** in  $\text{CH}_3\text{CN}$  solution: experimental peak  $[\text{M}+\text{H}]^+ = 730.3447$  Da, calculated for  $\text{C}_{37}\text{H}_{46}\text{AuN}_3 = 730.3430$ ,  $\Delta = 2.32$  ppm.

**(1,3-bis(2,6-diisopropylphenyl)-2,3-dihydro-1H-imidazol-2-yl)((4-ethoxyphenyl)ethynyl)gold (3c).** Yield 77% (Yield 57% when base = *t*-BuOK), white powder.

$^1\text{H}$  NMR ( $\text{CDCl}_3$ , 300 MHz):  $\delta$  7.49 (t,  $J = 7.8$  Hz, 2H), 7.28 (d,  $J = 7.8$  Hz, 4H), 7.25 – 7.19 (m, 2H), 7.11 (s, 2H), 6.66 – 6.60 (m, 2H), 3.93 (q,  $J = 7.0$  Hz, 2H), 2.61 (sept,  $J = 6.9$  Hz, 4H), 1.38 (d,  $J = 6.9$  Hz, 12H), 1.33 (t,  $J = 7.1$  Hz, 3H), 1.21 (d,  $J = 6.9$  Hz, 12H).

$^{13}\text{C}\{^1\text{H}\}$  NMR ( $\text{CDCl}_3$ , 76 MHz):  $\delta$  191.3, 157.2, 145.8, 134.5, 133.6, 130.6, 127.0, 124.3, 123.3, 118.4, 113.8, 103.5, 63.3, 28.9, 24.8, 24.2, 14.9.

ESI-(+)HRMS,  $m/z$ : 731.3280, calcd for  $\text{C}_{37}\text{H}_{45}\text{N}_2\text{AuO}$ : 731.3270  $[\text{M}+\text{H}]^+$ , ( $\Delta = 1.37$  ppm).

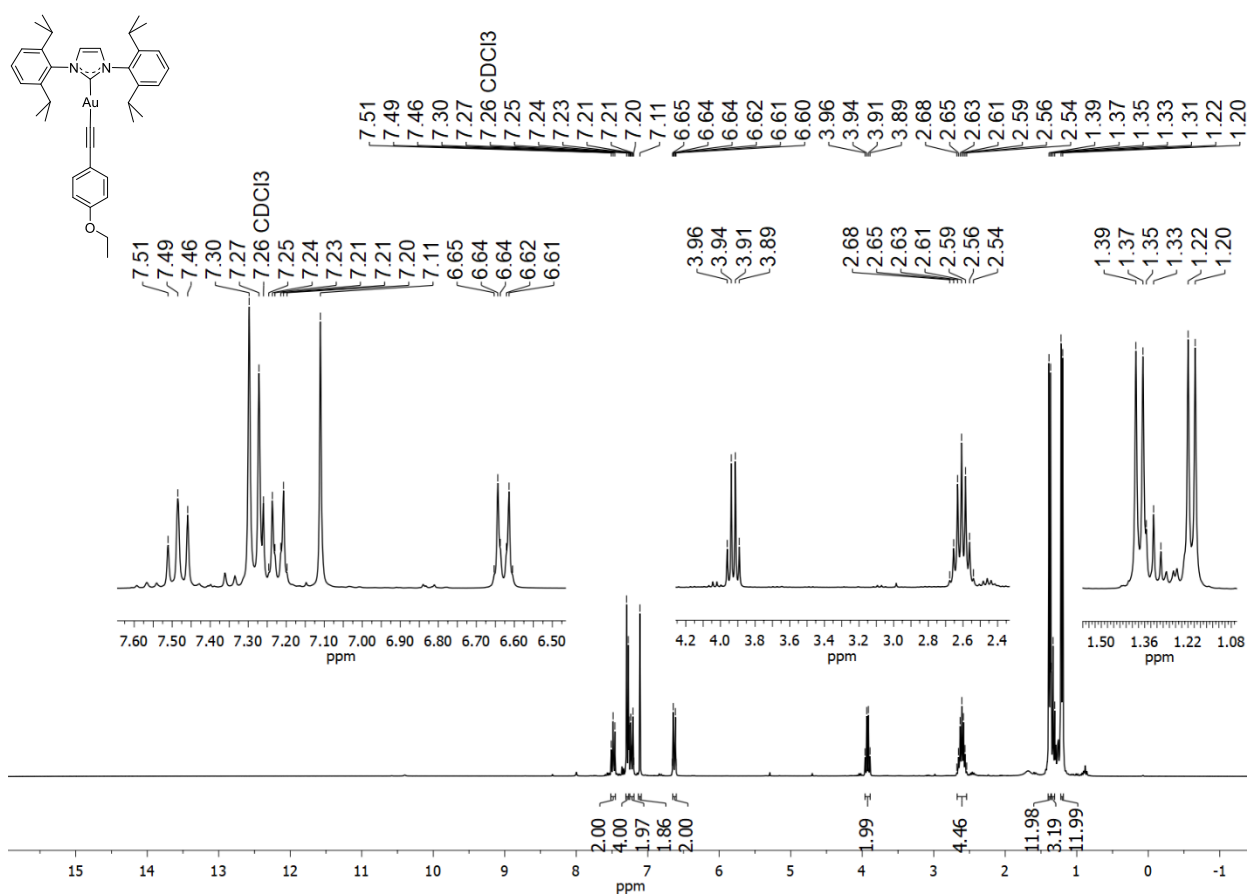

**Figure S8.**  $^1\text{H}$  NMR spectrum of compound 3c ( $\text{CDCl}_3$ , 300 MHz).

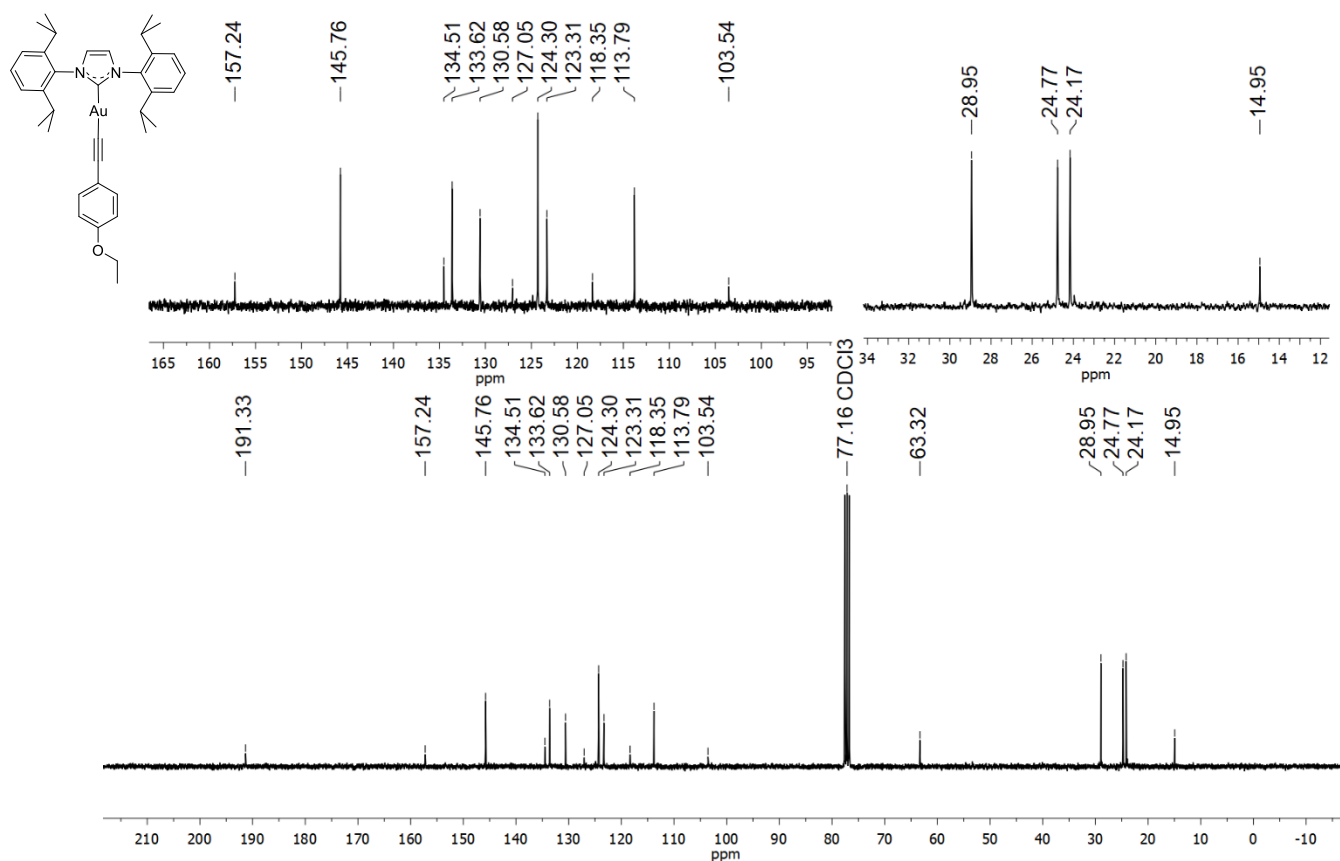

**Figure S9.**  $^{13}\text{C}\{^1\text{H}\}$  NMR spectrum of compound **3c** ( $\text{CDCl}_3$ , 76 MHz).

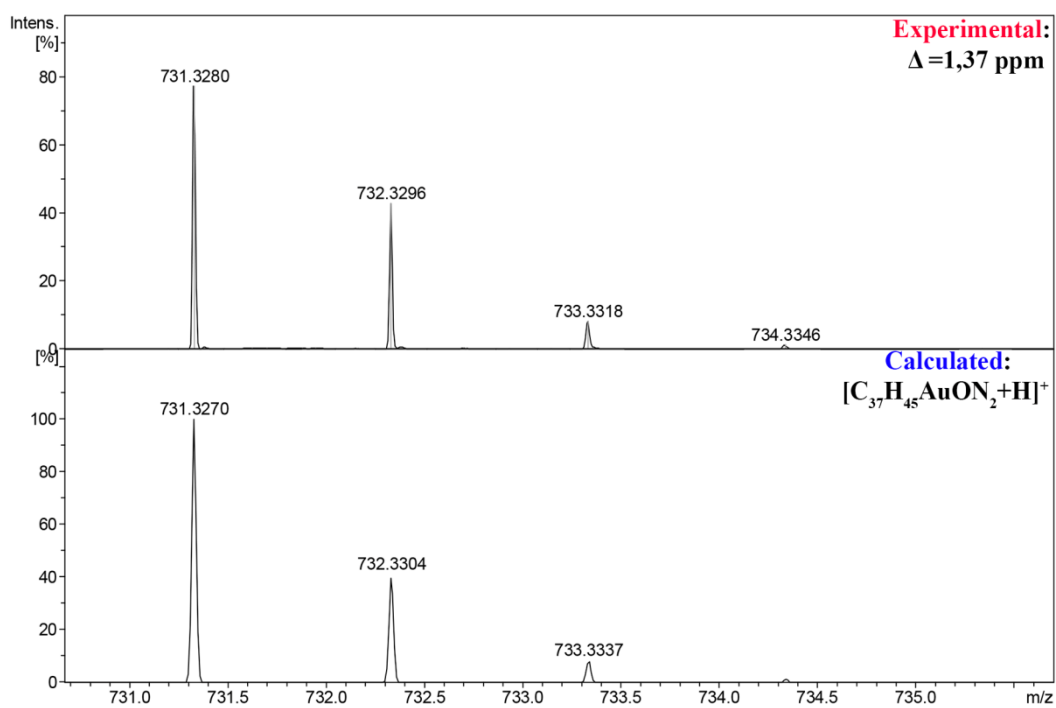

**Figure S10.** Experimental and theoretical ESI-(+)-HRMS spectrum of **3c** in  $\text{CH}_3\text{CN}$  solution: experimental peak  $[\text{M}+\text{H}]^+ = 731.3280$  Da, calculated for  $\text{C}_{37}\text{H}_{45}\text{N}_2\text{AuO} = 731.3270$ ,  $\Delta = 1,37$  ppm.

**(1,3-bis(2,6-diisopropylphenyl)-2,3-dihydro-1H-imidazol-2-yl)(pent-1-yn-1-yl)gold (3d).**

Yield 54%, white powder.

$^1\text{H}$  NMR ( $\text{CDCl}_3$ , 300 MHz):  $\delta$  7.47 (t,  $J = 7.8$  Hz, 2H), 7.26 (d,  $J = 7.8$  Hz, 4H), 7.07 (s, 2H), 2.59 (sept,  $J = 6.9$  Hz, 4H), 2.16 (t,  $J = 7.4$  Hz, 2H), 1.48 – 1.38 (m, 2H), 1.35 (d,  $J = 6.9$  Hz, 12H), 1.19 (d,  $J = 6.9$  Hz, 12H), 0.83 (t,  $J = 7.3$  Hz, 3H).

$^{13}\text{C}\{^1\text{H}\}$  NMR ( $\text{CDCl}_3$ , 76 MHz):  $\delta$  191.7, 145.7, 134.6, 130.5, 124.3, 123.2, 115.8, 104.5, 28.9, 24.7, 24.1, 23.7, 22.5, 13.9.

ESI-(+)HRMS,  $m/z$ : 653.3179, calcd for  $\text{C}_{32}\text{H}_{43}\text{AuN}_2$ : 653.3165  $[\text{M}+\text{H}]^+$ , ( $\Delta = 2.14$  ppm).

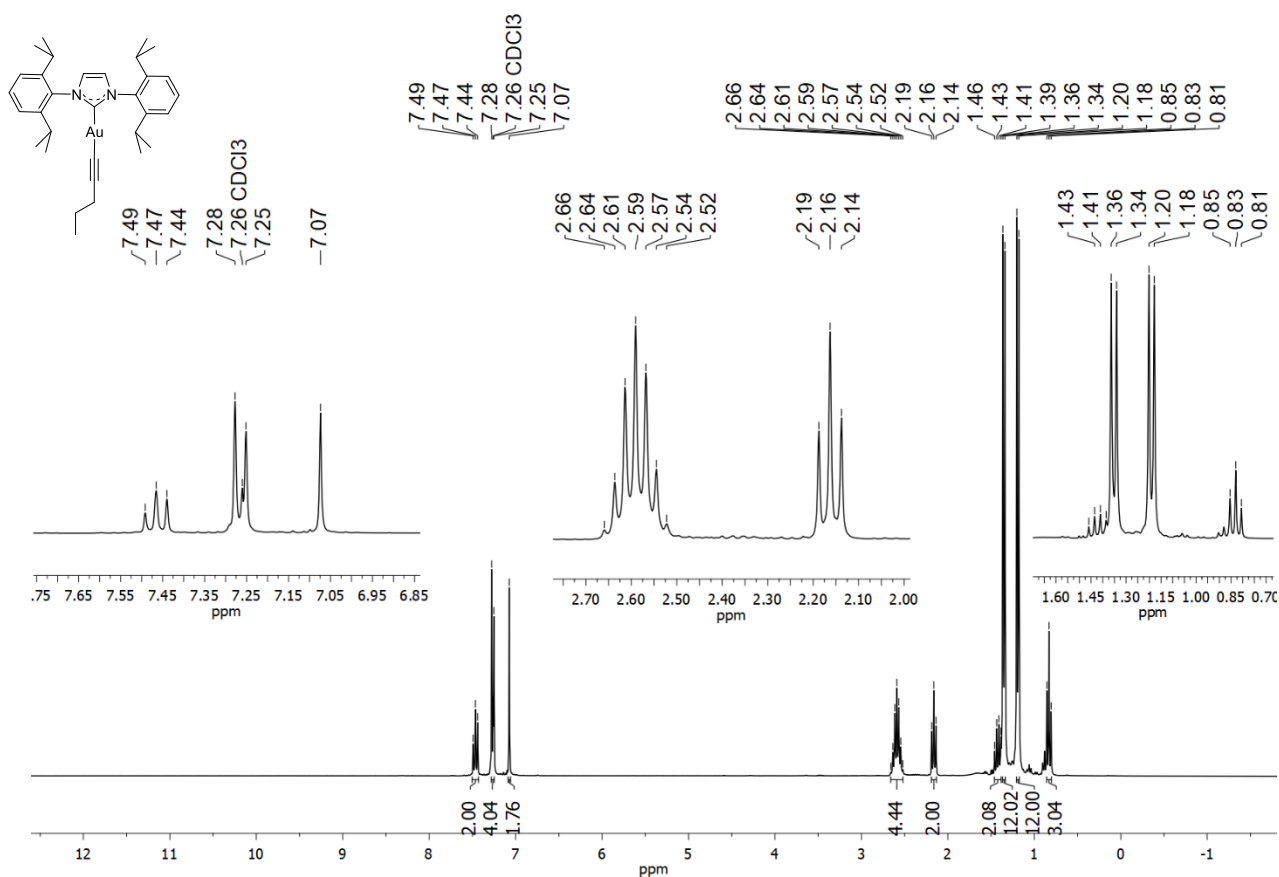

**Figure S11.**  $^1\text{H}$  NMR spectrum of compound **3d** ( $\text{CDCl}_3$ , 300 MHz).

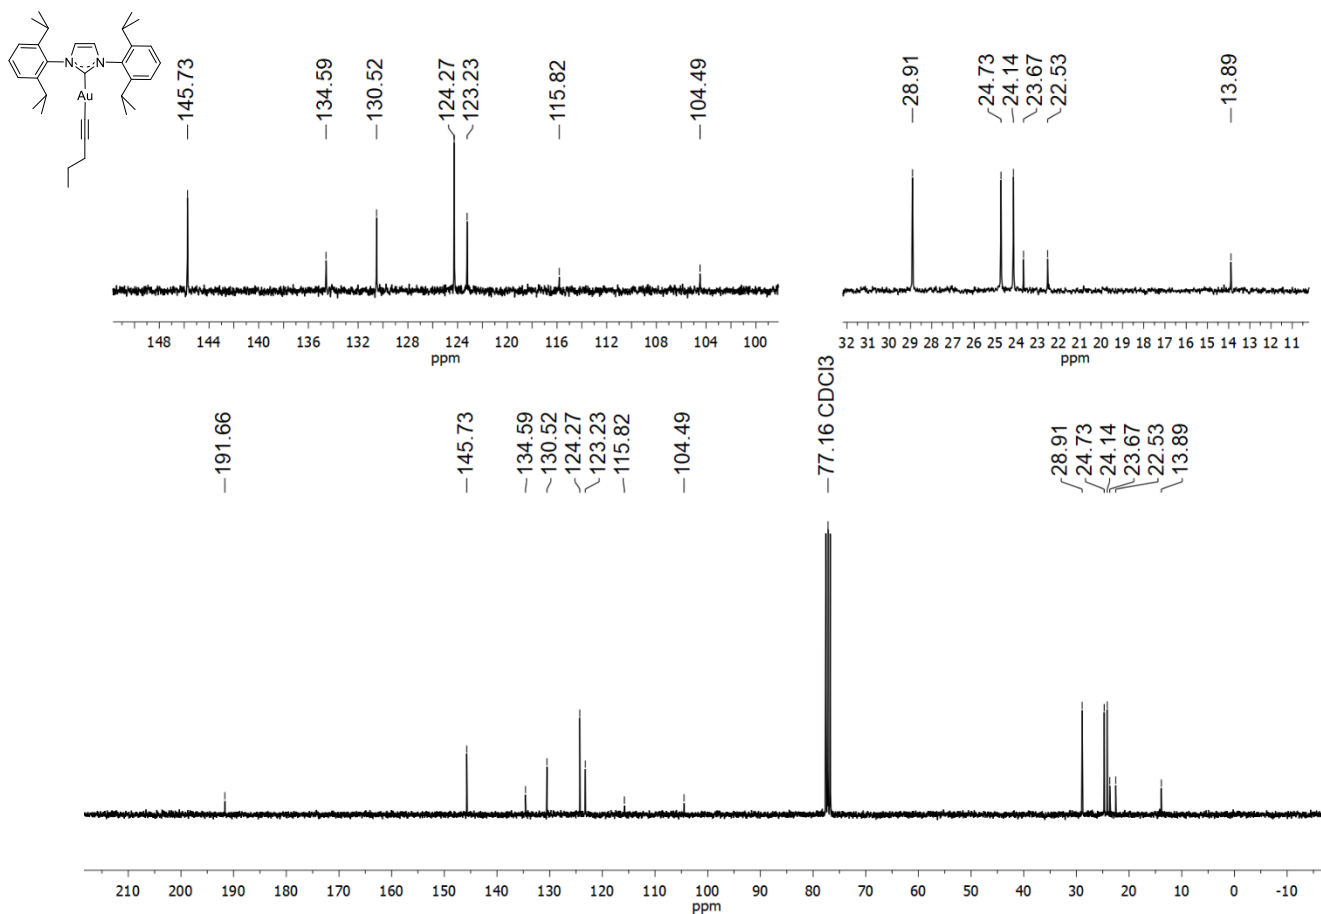

**Figure S12.**  $^{13}\text{C}\{^1\text{H}\}$  NMR spectrum of compound **3d** ( $\text{CDCl}_3$ , 76 MHz).

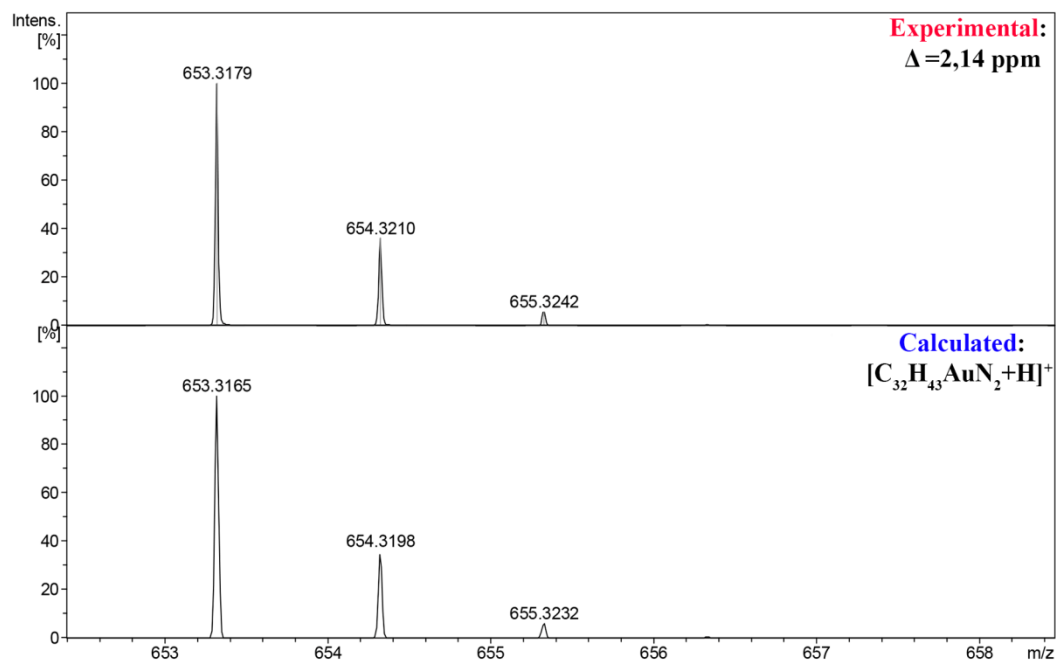

**Figure S13.** Experimental and theoretical ESI-(+)HRMS spectrum of **3d** in  $\text{CH}_3\text{CN}$  solution: experimental peak  $[\text{M}+\text{H}]^+ = 653.3179$  Da, calculated for  $\text{C}_{32}\text{H}_{43}\text{AuN}_2 = 653.3165$ ,  $\Delta = 2.14$  ppm.

**(1,3-bis(2,6-diisopropylphenyl)-2,3-dihydro-1H-imidazol-2-yl)(pyridin-2-ylethynyl)gold (3e)**. Yield 22%, off-white powder.

$^1\text{H}$  NMR ( $\text{CD}_2\text{Cl}_2$ , 300 MHz):  $\delta$  8.33 (d,  $J = 4.1$  Hz, 1H), 7.58 (t,  $J = 7.7$  Hz, 2H), 7.44 (t,  $J = 7.6$  Hz, 1H), 7.37 (d,  $J = 7.7$  Hz, 4H), 7.22 (s, 2H), 7.13 (d,  $J = 7.8$  Hz, 1H), 7.01 – 6.91 (m, 1H), 2.58 (sept,  $J = 6.6$  Hz, 4H), 1.38 (d,  $J = 6.8$  Hz, 12H), 1.24 (d,  $J = 6.8$  Hz, 12H).

$^{13}\text{C}\{^1\text{H}\}$  NMR ( $\text{CD}_2\text{Cl}_2$ , 151 MHz):  $\delta$  190.8, 149.8, 146.4, 145.8, 135.8, 134.7, 131.9, 131.1, 127.2, 124.7, 124.0, 121.1, 103.4, 29.4, 24.9, 24.3.

ESI-(+)HRMS,  $m/z$ : 688.2961, calcd for  $\text{C}_{34}\text{H}_{40}\text{AuN}_3$ : 688.2961 [ $\text{M}+\text{H}$ ] $^+$ , ( $\Delta = 0$  ppm).

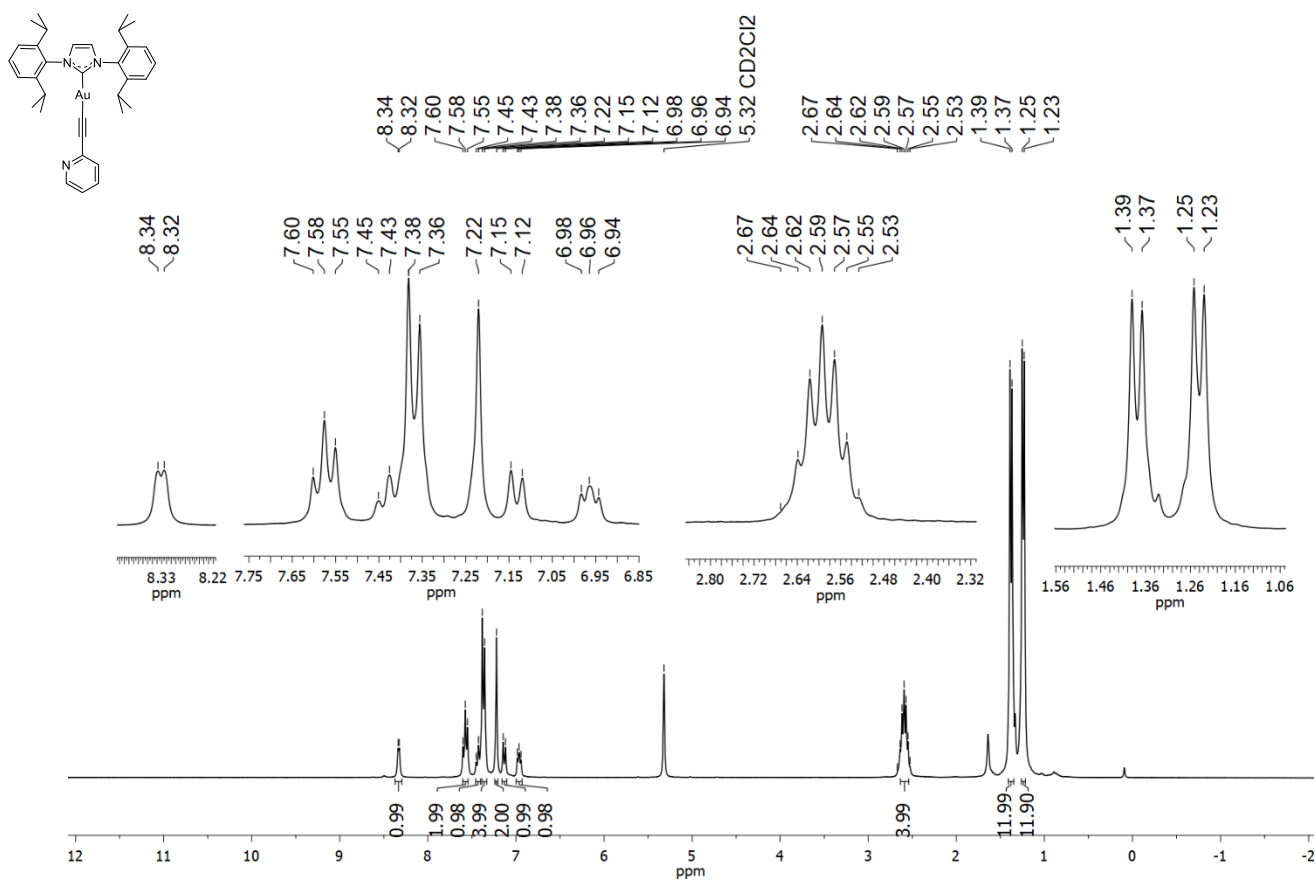

**Figure S14.**  $^1\text{H}$  NMR spectrum of compound **3e** ( $\text{CD}_2\text{Cl}_2$ , 300 MHz).



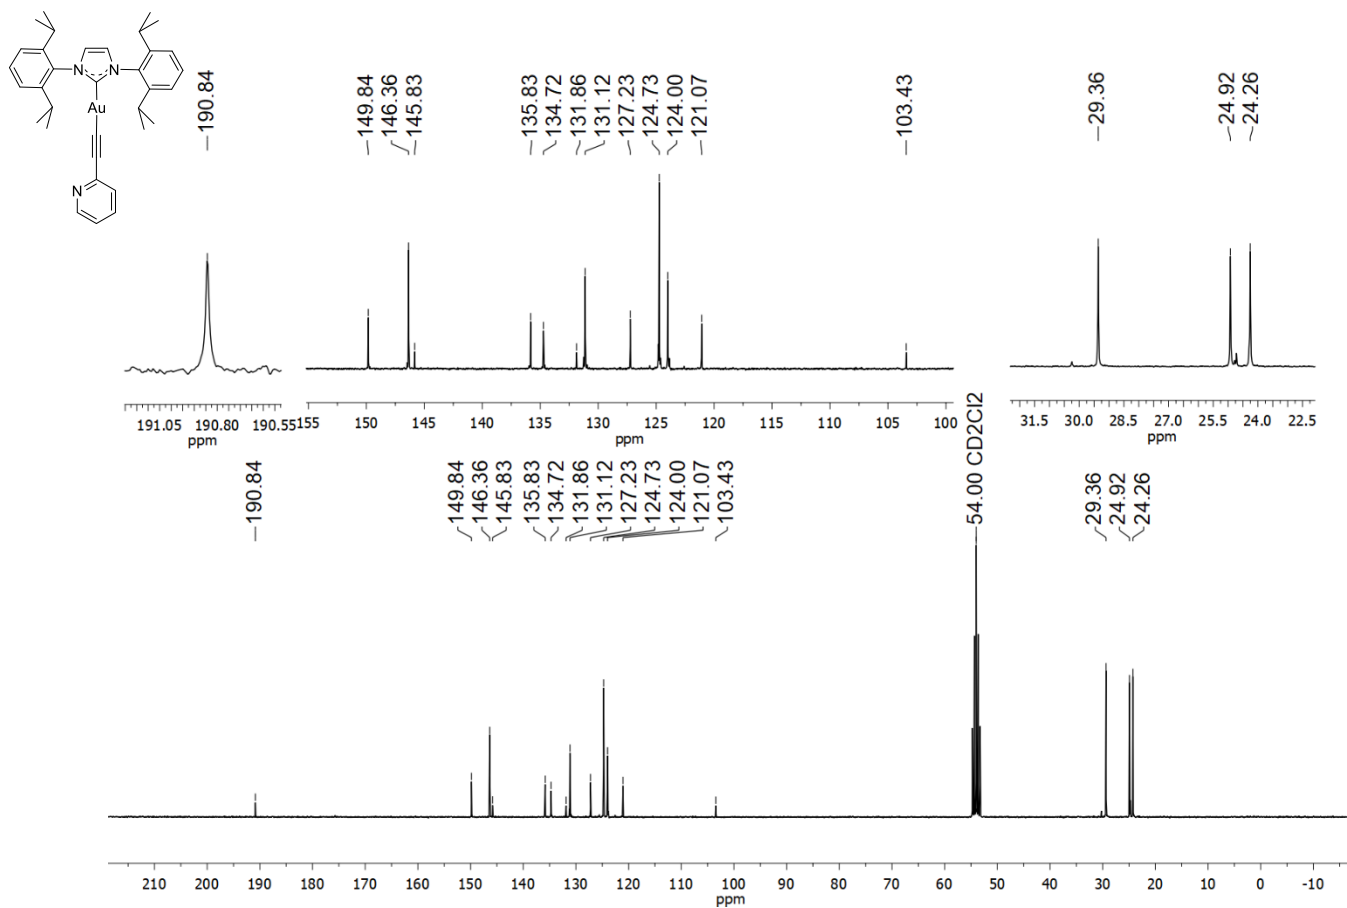

**Figure S15.**  $^{13}\text{C}\{^1\text{H}\}$  NMR spectrum of compound **3e** ( $\text{CD}_2\text{Cl}_2$ , 151 MHz).

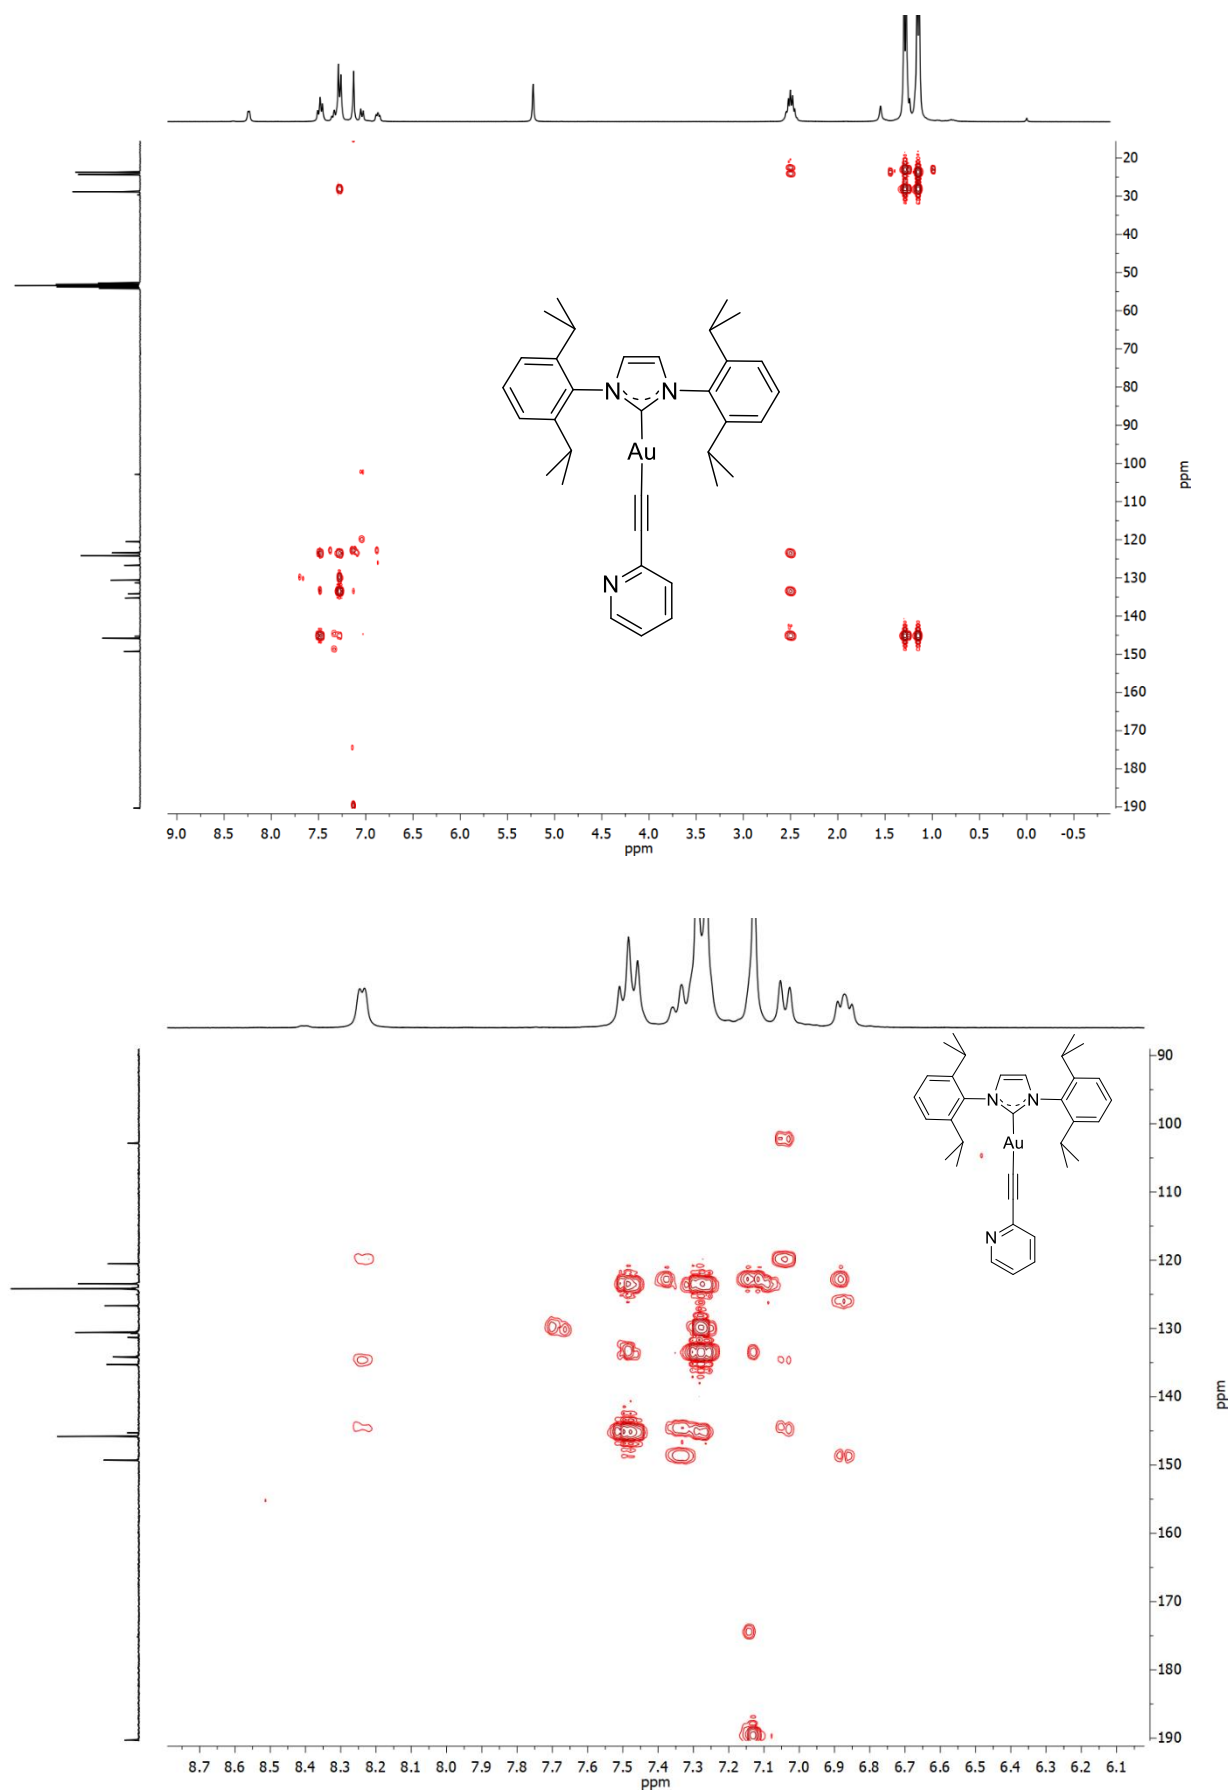

**Figure S16.**  $^1\text{H}$ - $^{13}\text{C}$  HMBC spectra of compound **3e** (400 MHz,  $\text{CD}_2\text{Cl}_2$ ).

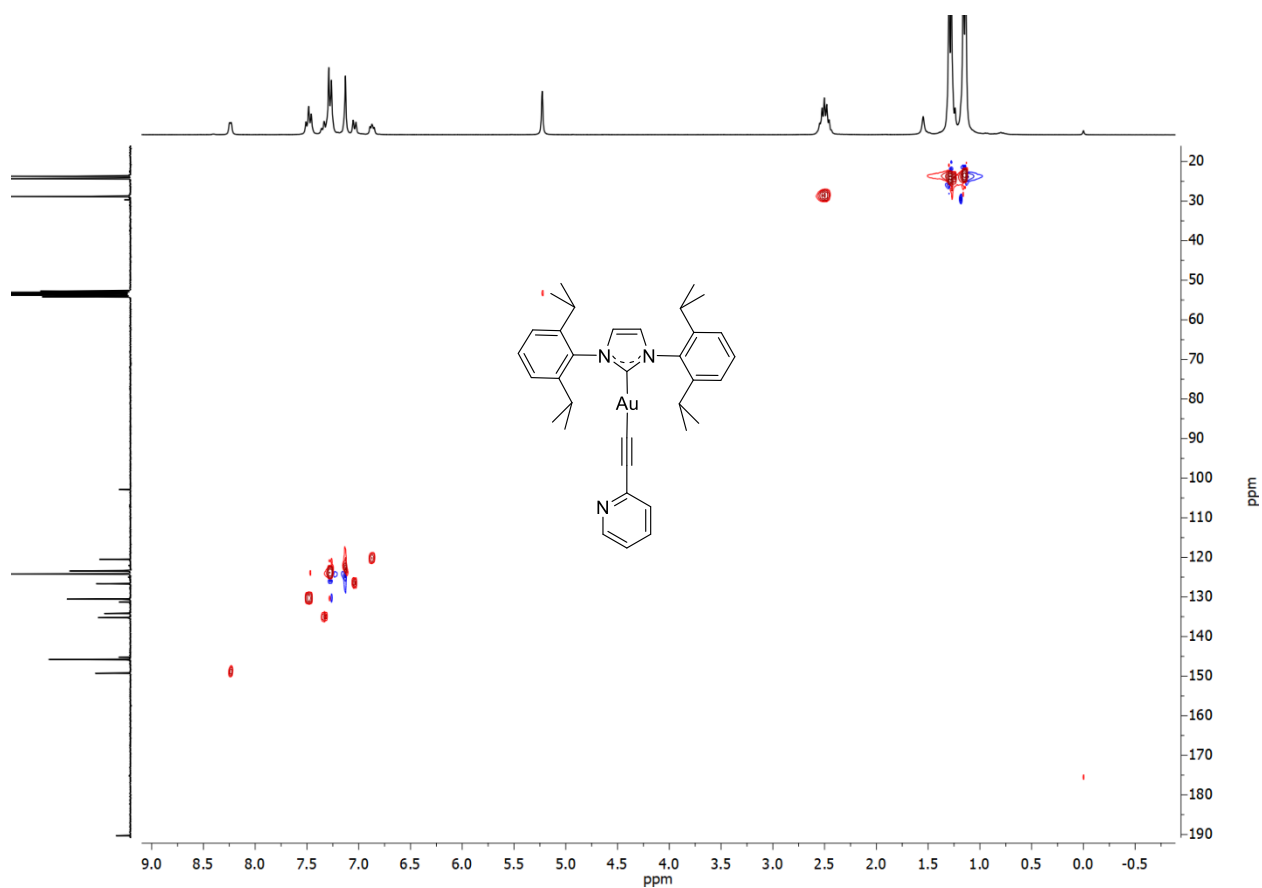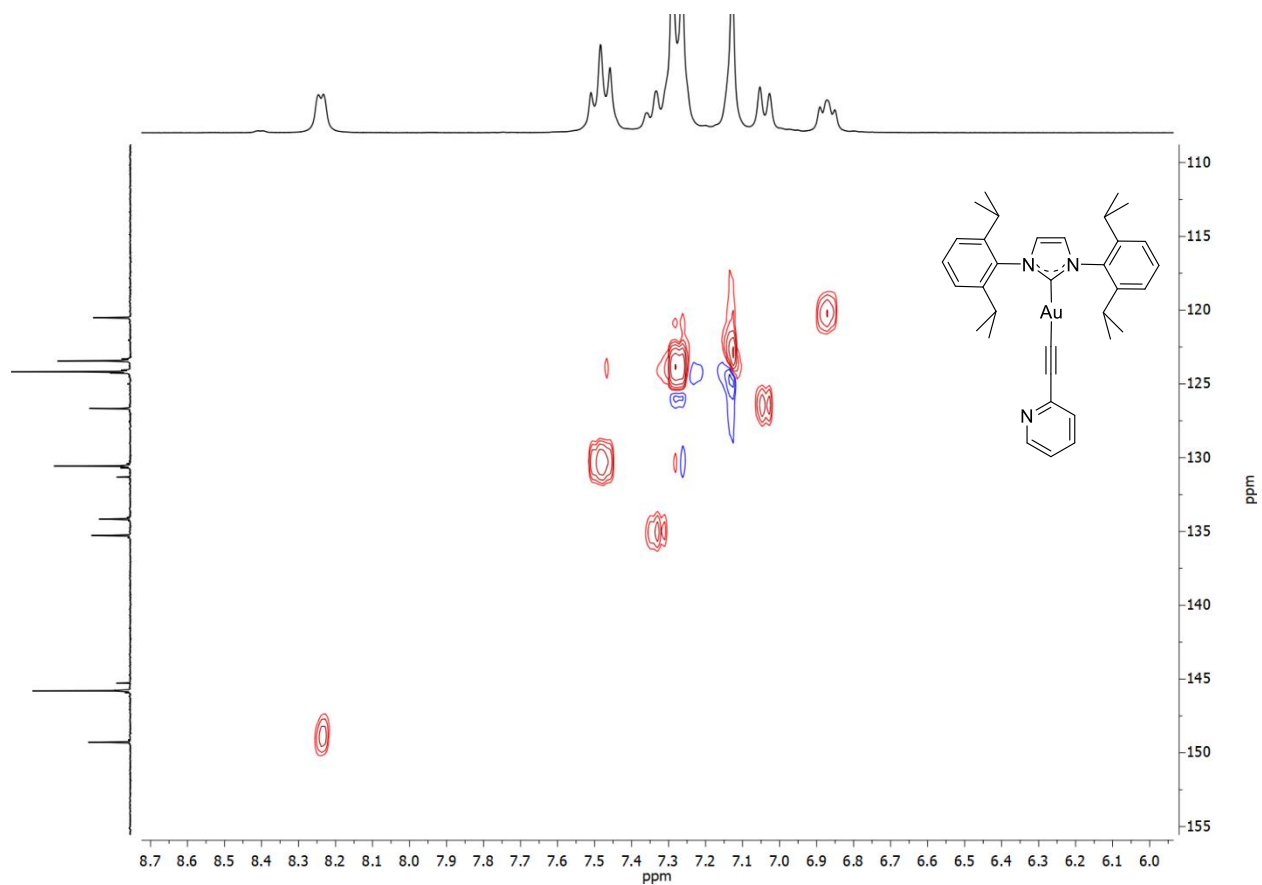

**Figure S17.**  $^1\text{H}$ - $^{13}\text{C}$  HSQC spectra of compound **3e** (400 MHz,  $\text{CD}_2\text{Cl}_2$ ).

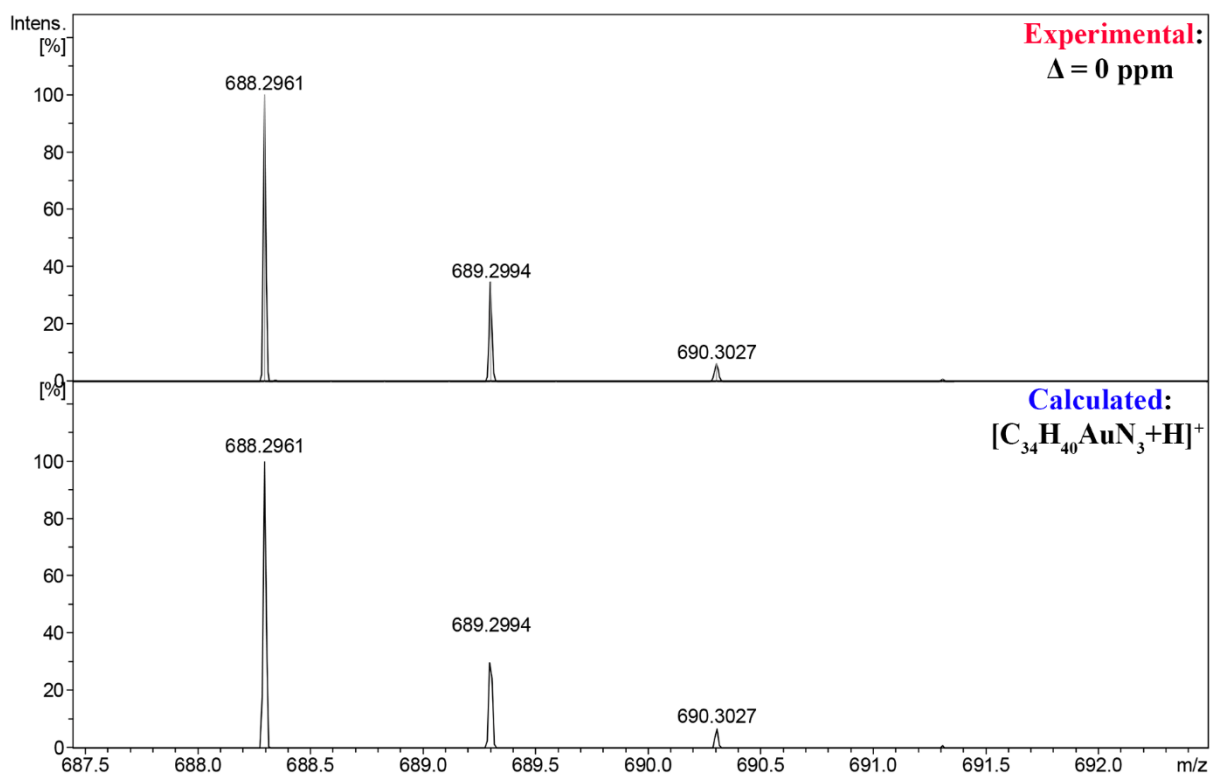

**Figure S18.** Experimental and theoretical ESI-(+)HRMS spectrum of **3e** in CH<sub>3</sub>CN solution: experimental peak  $[M+H]^+ = 688.2961$  Da, calculated for  $C_{34}H_{40}AuN_3 = 688.2961$ ,  $\Delta = 0$  ppm.

**1,3-bis(2,6-diisopropylphenyl)-1H-imidazol-3-ium bis((4-(trifluoromethyl)phenyl)ethynyl)aurate(I) (4a).**

Yield 42%, yellowish or white powder.

$^1\text{H}$  NMR ( $\text{CD}_2\text{Cl}_2$ , 300 MHz):  $\delta$  8.67 (s, 1H), 7.95 (s, 2H), 7.63 (t,  $J = 7.8$  Hz, 2H), 7.40 (d,  $J = 7.6$  Hz, 4H), 7.36 (d,  $J = 8.1$  Hz, 4H), 7.30 (d,  $J = 8.1$  Hz, 4H), 2.41 (sept,  $J = 6.4$  Hz, 4H), 1.28 (d,  $J = 6.7$  Hz, 12H), 1.21 (d,  $J = 6.8$  Hz, 12H).

$^{13}\text{C}\{^1\text{H}\}$  NMR ( $\text{CD}_2\text{Cl}_2$ , 126 MHz):  $\delta$  145.5, 139.9, 137.1, 133.2, 132.4, 131.8 (d,  $J_{\text{C-F}} = 1.4$  Hz), 129.9, 127.0 (q,  $J_{\text{C-F}} = 32.7$  Hz), 126.9, 125.7, 125.21 (q,  $J_{\text{C-F}} = 3.8$  Hz), 125.15 (q,  $J_{\text{C-F}} = 271.4$  Hz), 102.1, 29.8, 24.9, 24.1.

$^{19}\text{F}\{^1\text{H}\}$  NMR ( $\text{CDCl}_3$ , 282 MHz):  $\delta$  -65.54 ( $\text{CF}_3$ ).

ESI(-)-HRMS,  $m/z$ : 535.0201, calcd for  $\text{C}_{18}\text{H}_8\text{AuF}_6$ : 535.0190 [ $\text{M}$ ] $^-$ , ( $\Delta = 2.06$  ppm).

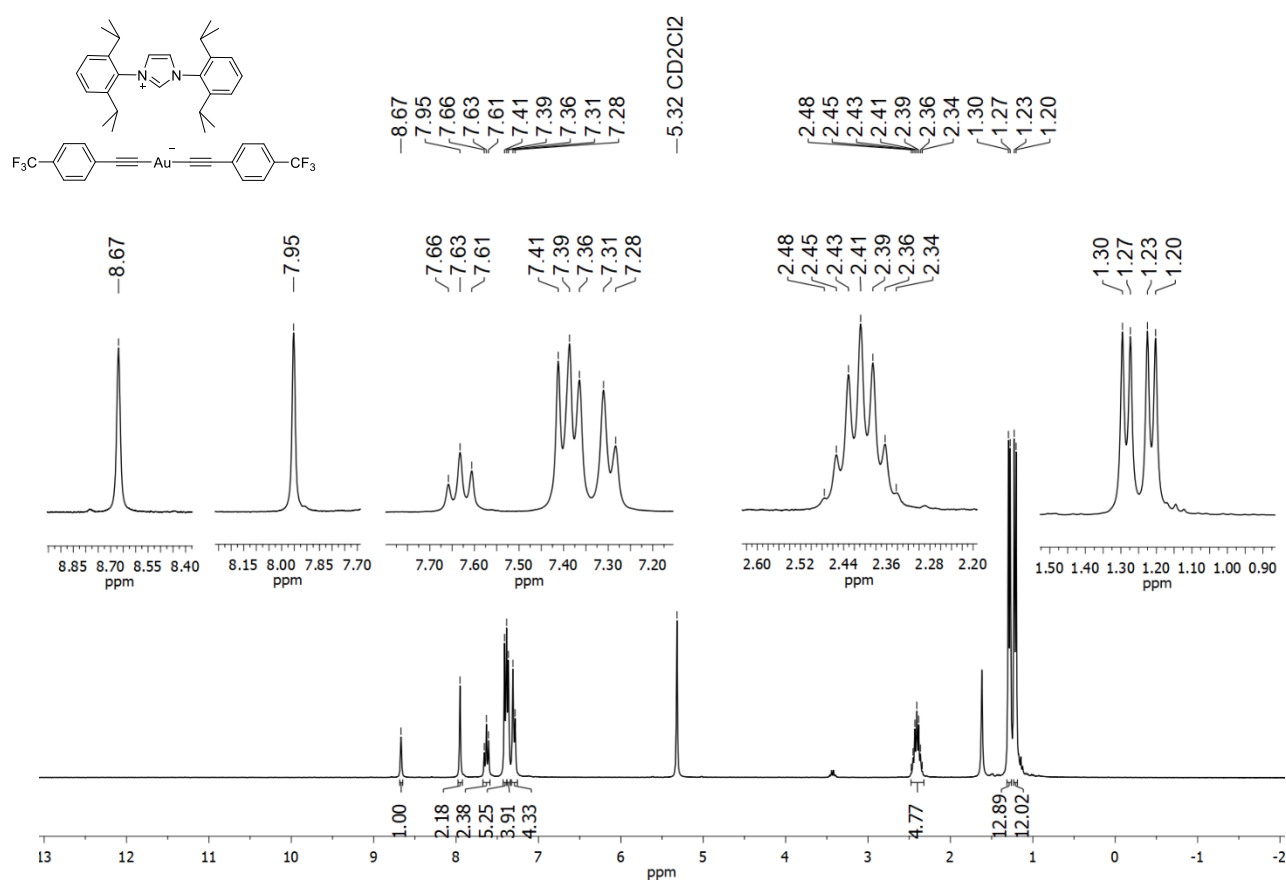

**Figure S19.**  $^1\text{H}$  NMR spectrum of compound 4a ( $\text{CD}_2\text{Cl}_2$ , 300 MHz).

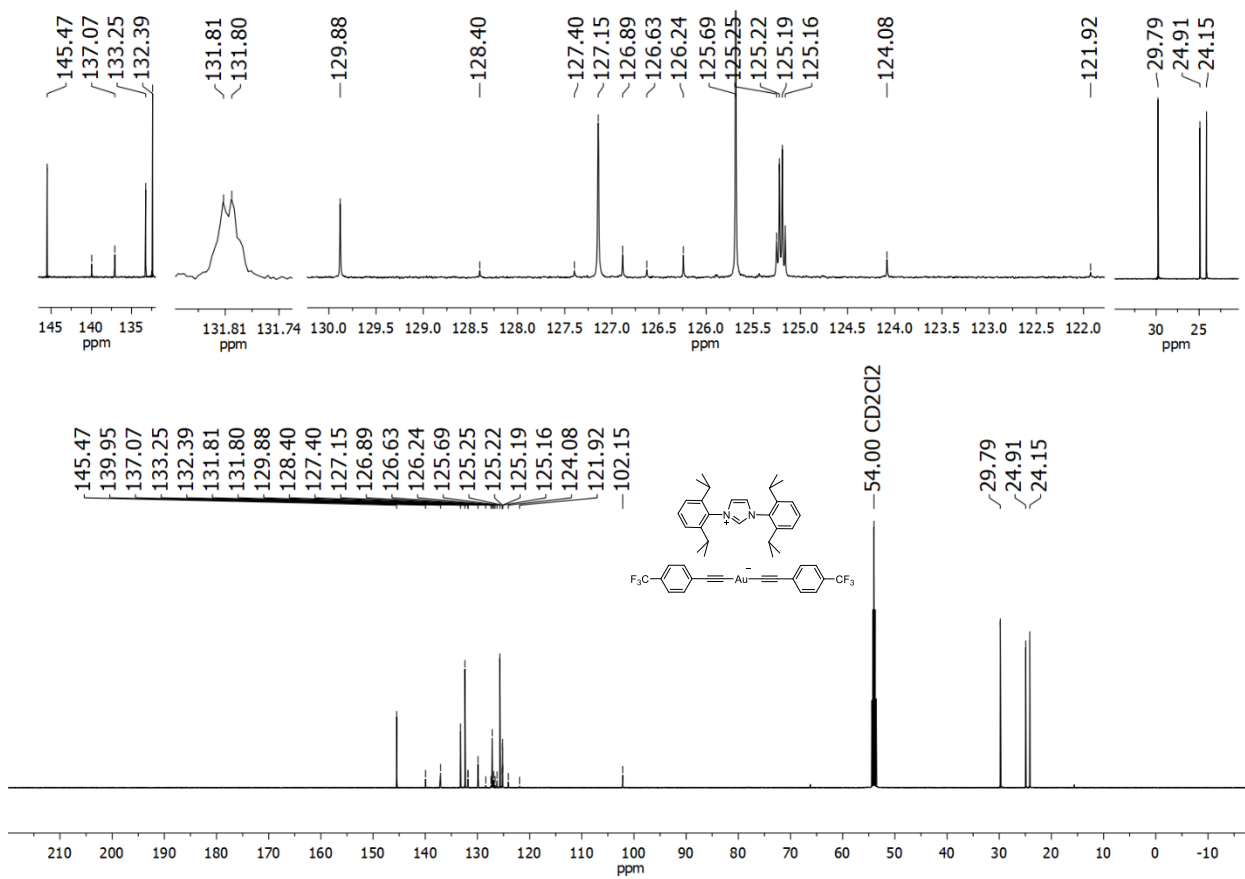

**Figure S20.**  $^{13}\text{C}\{^1\text{H}\}$  NMR spectrum of compound **4a** ( $\text{CD}_2\text{Cl}_2$ , 126 MHz).

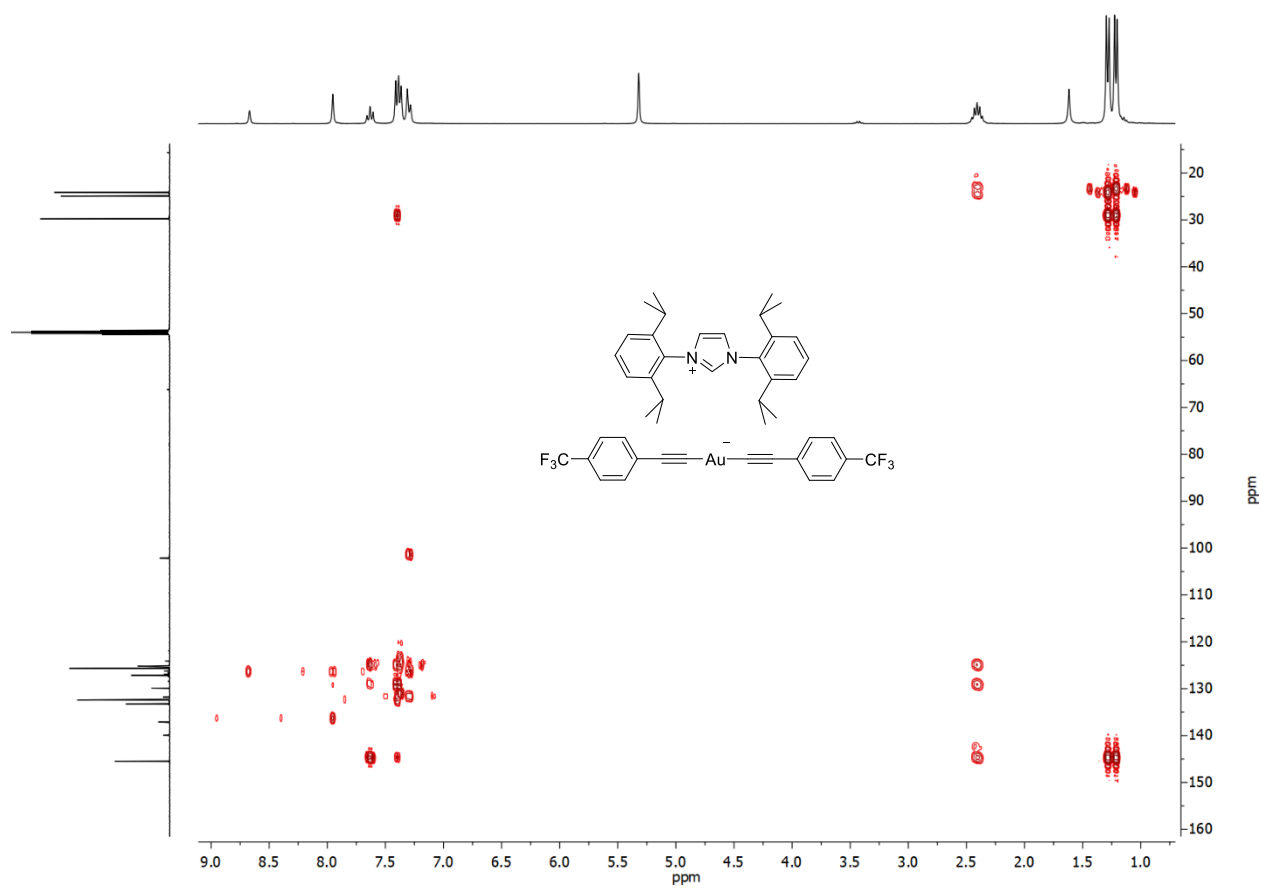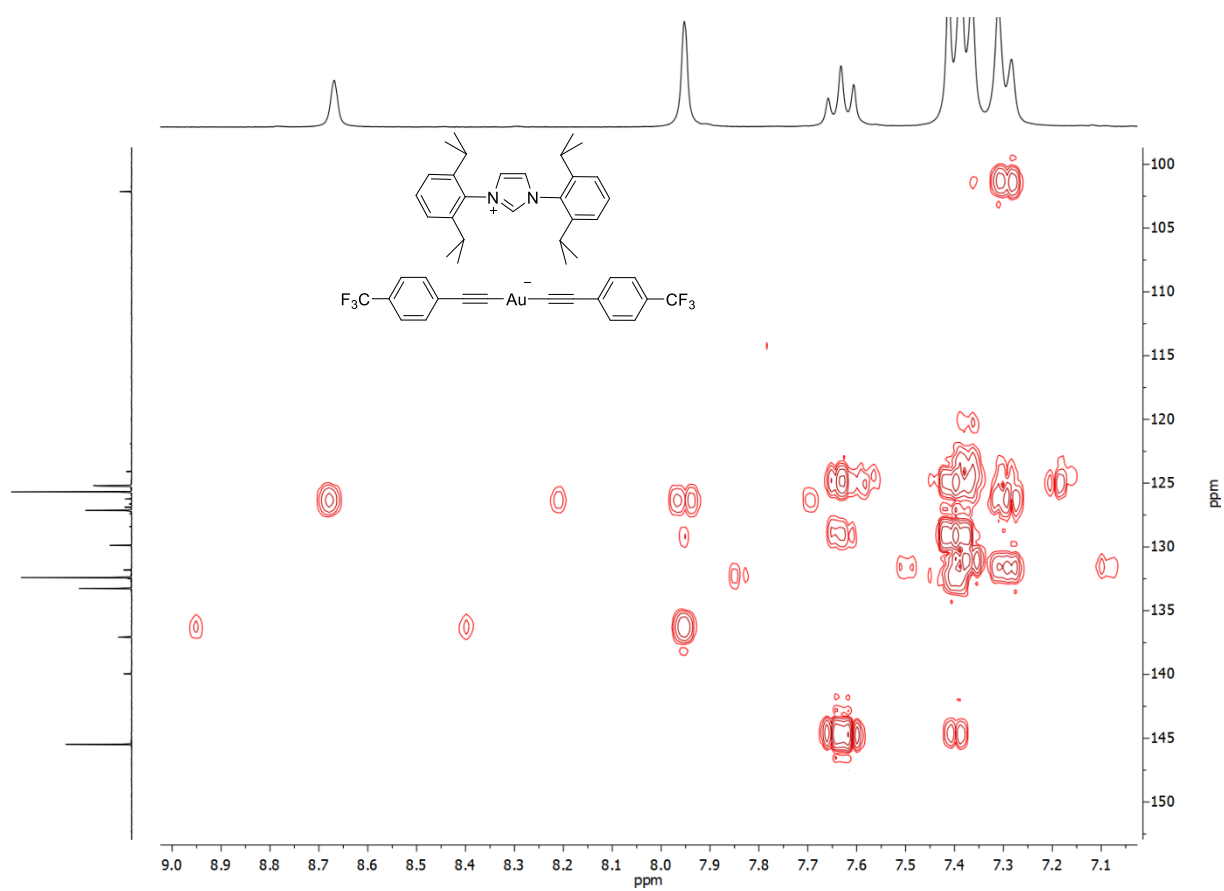

Figure S21.  $^1\text{H}$ - $^{13}\text{C}$  HMBC spectra of compound **4a** (400 MHz,  $\text{CD}_2\text{Cl}_2$ ).

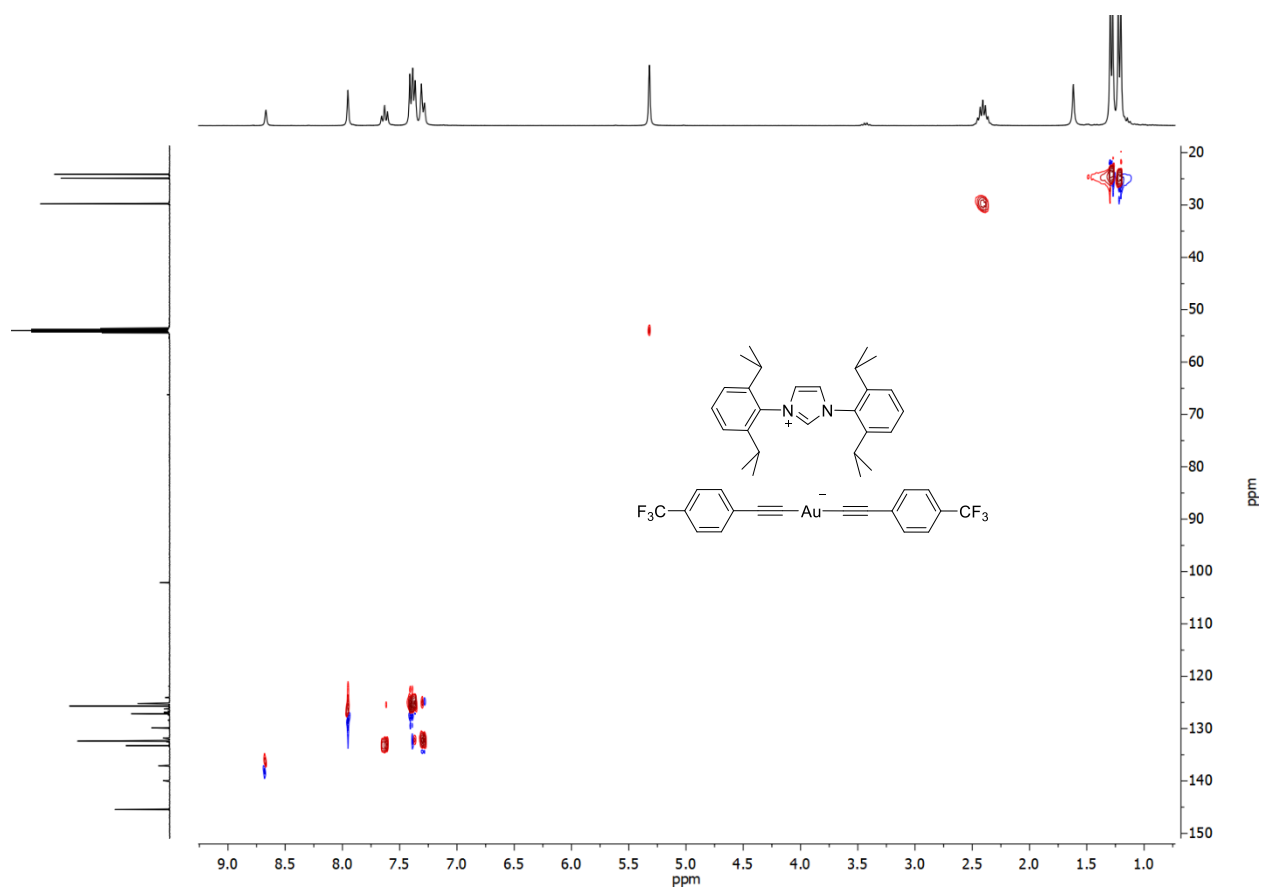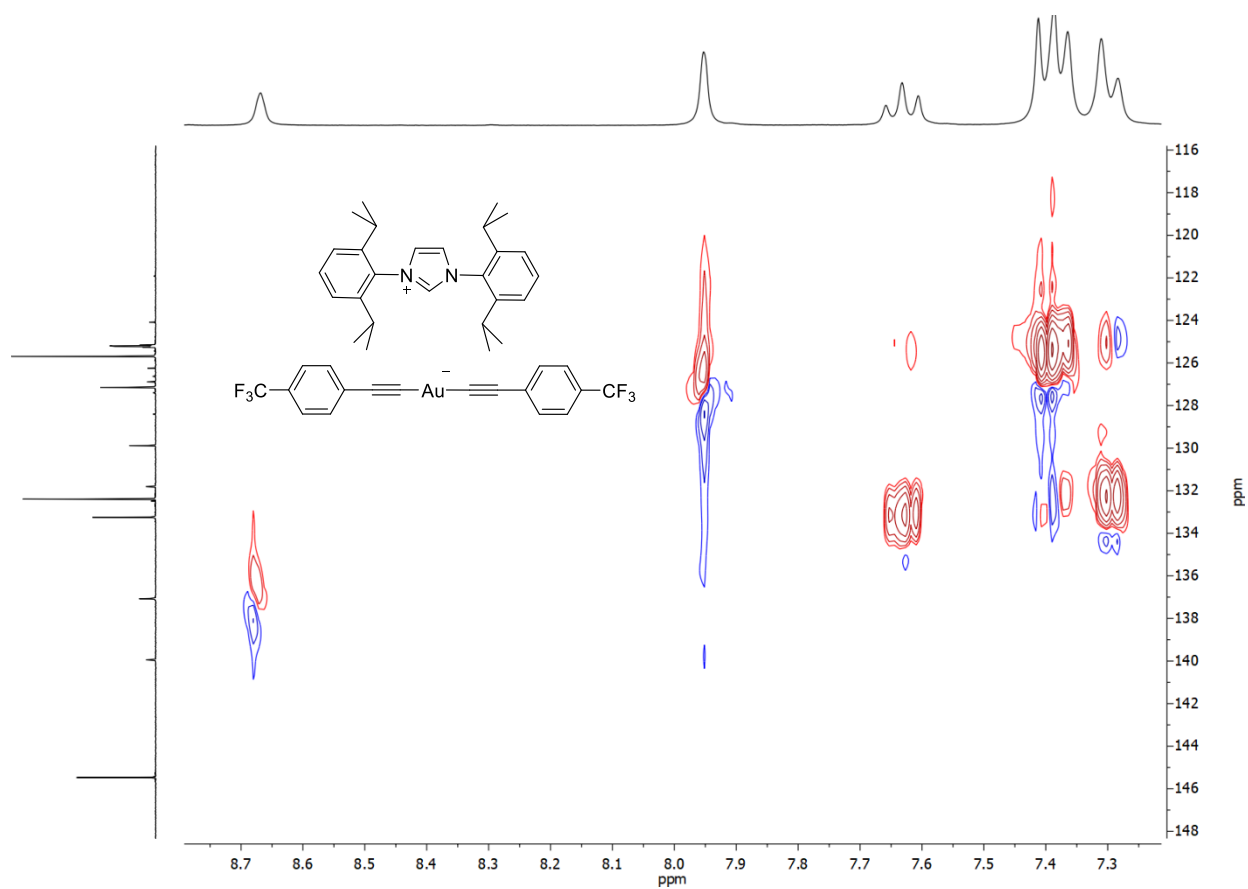

**Figure S22.**  $^1\text{H}$ - $^{13}\text{C}$  HSQC spectra of compound **4a** (400 MHz,  $\text{CD}_2\text{Cl}_2$ ).



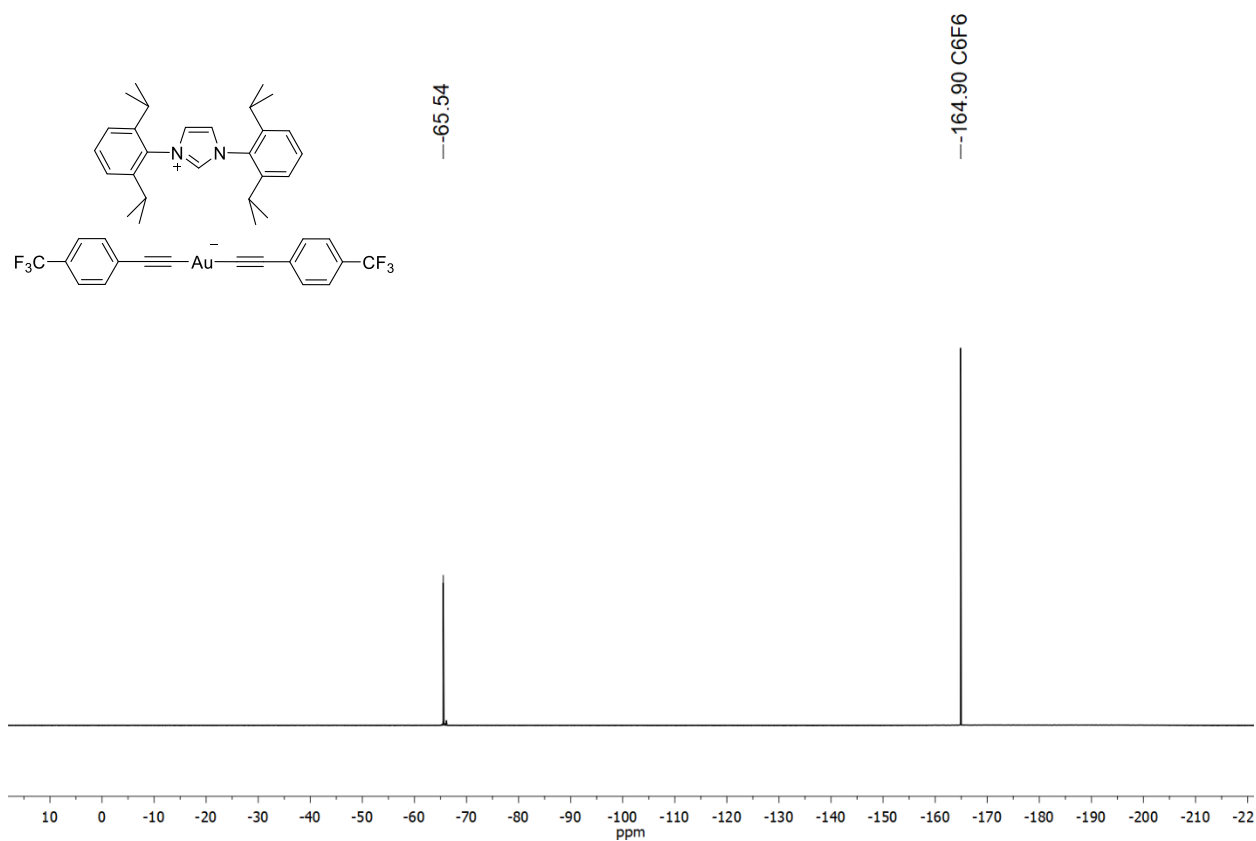

**Figure S23.**  $^{19}\text{F}\{^1\text{H}\}$  NMR spectrum of compound **4a** ( $\text{CDCl}_3$ , 282 MHz). Standard:  $\text{C}_6\text{F}_6$  with respect to  $\text{CFCl}_3$ .

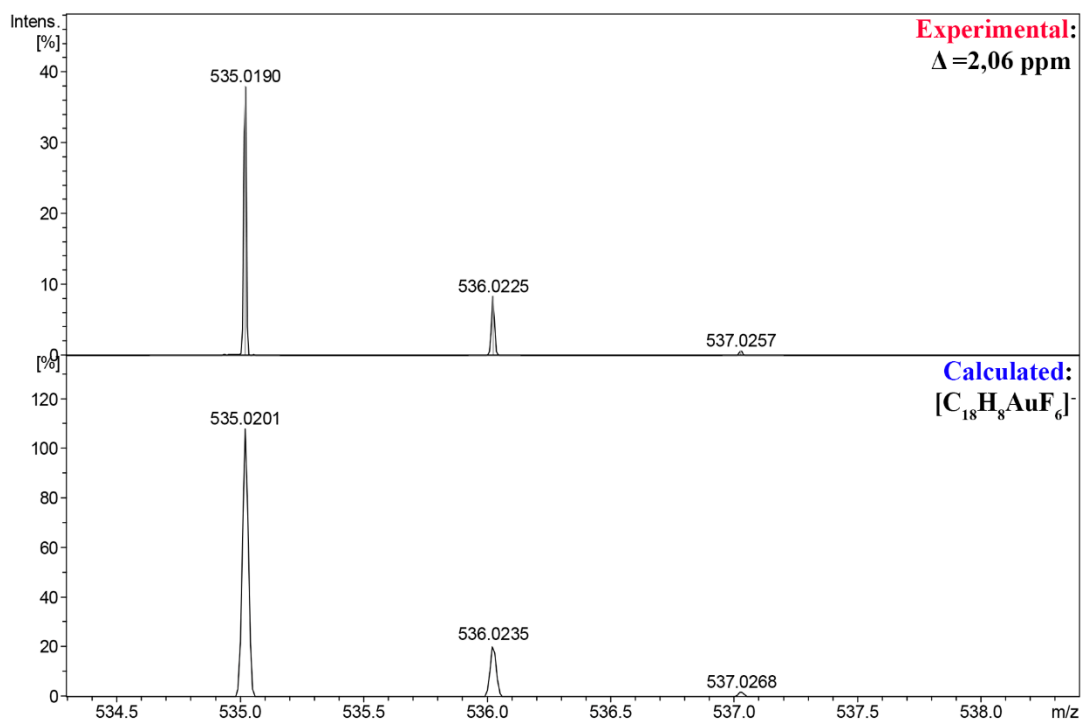

**Figure S24.** Experimental and theoretical ESI(-)HRMS spectrum of **4a** in  $\text{CH}_3\text{CN}$  solution: experimental peak  $[\text{M}]^- = 535.0201$  Da, calculated for  $\text{C}_{18}\text{H}_8\text{AuF}_6 = 535.0190$ ,  $\Delta = 2.06$  ppm.

## 5. Study of contaminated commercial reagents

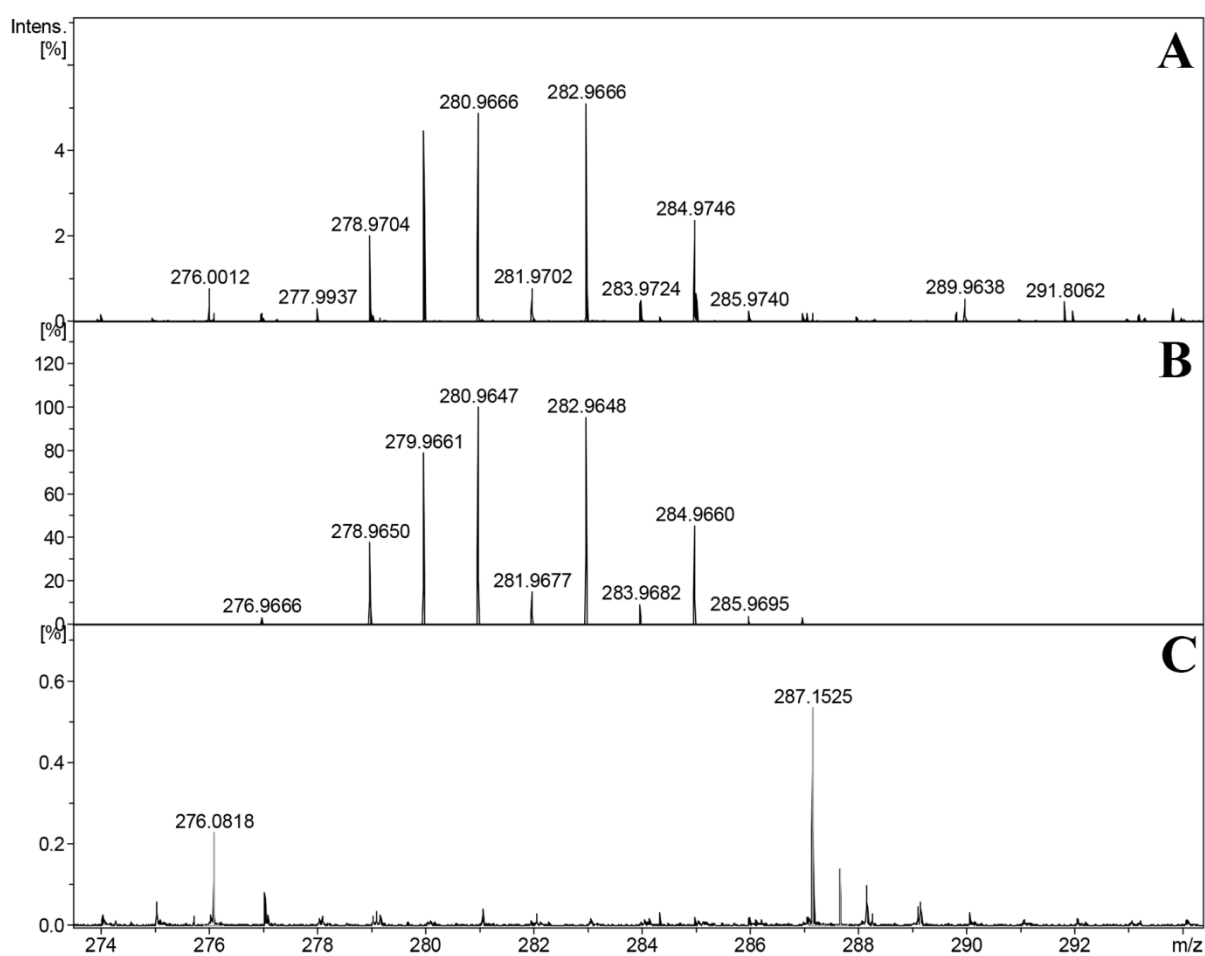

**Figure S25.** Experimental (A) and theoretical (B) ESI-(+)HRMS spectrum of THT-AuCl from commercial source contaminated with Pd for the  $[(C_4H_7S)_2PdH]^+$  ion; and experimental ESI-(+)HRMS spectrum (C) of the THT-AuCl prepared by ourselves, the same region.

## 6. SEM/DFSTEM and EDX investigation of Au particles and nanoparticles

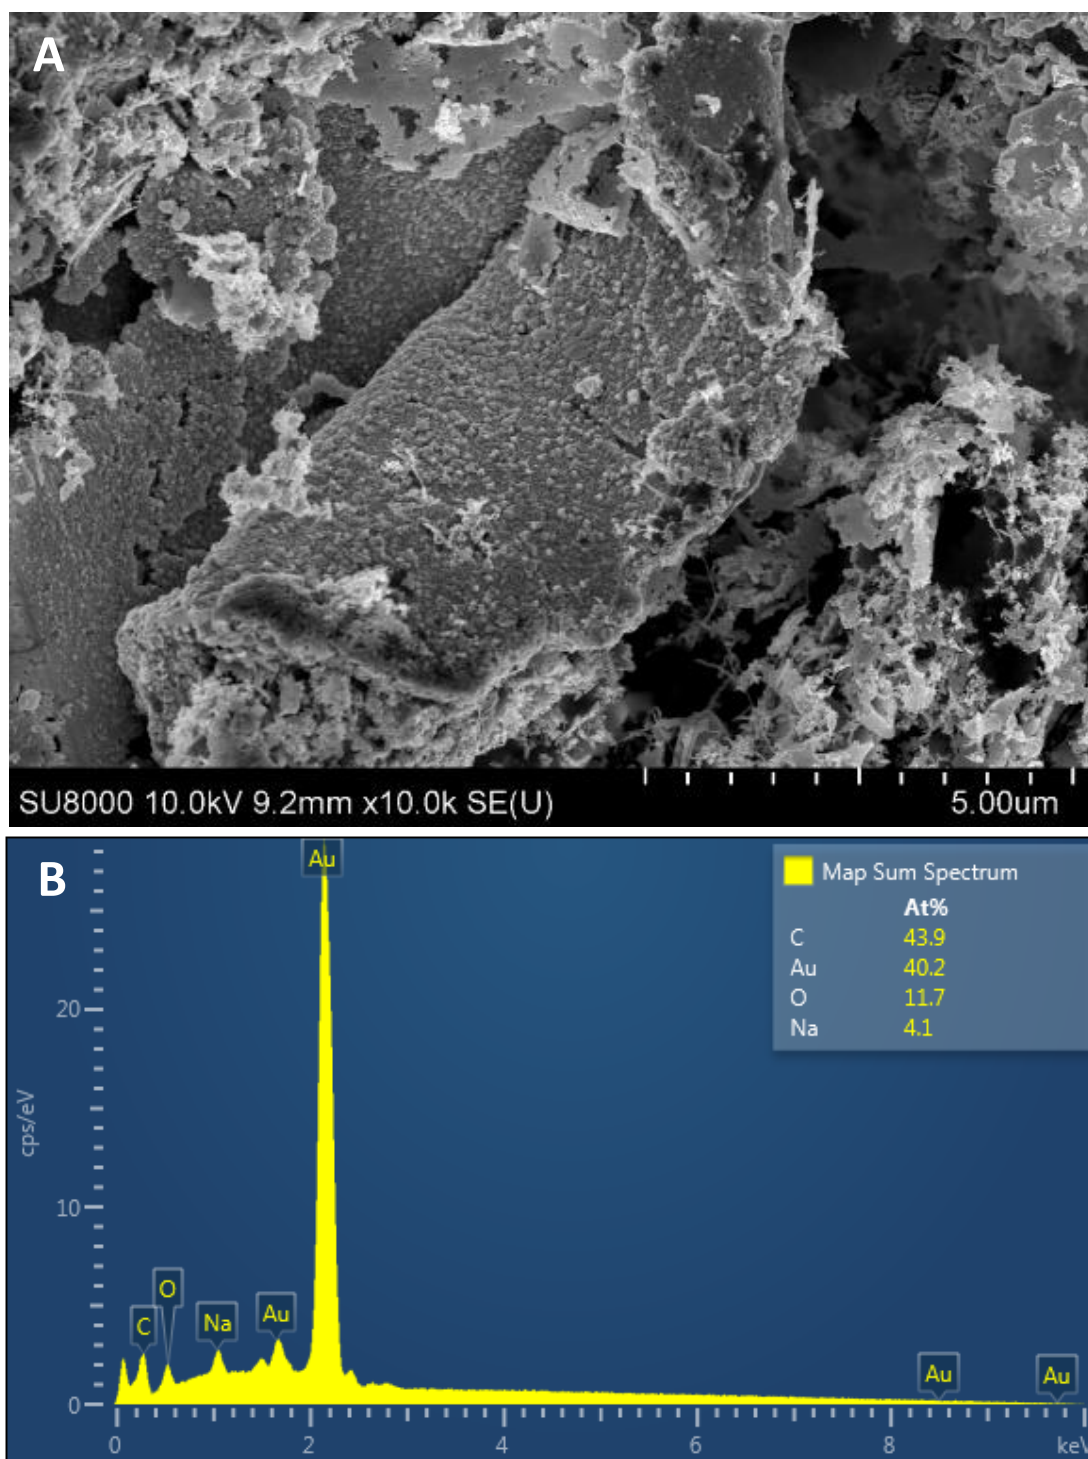

**Figure S26.** A) SEM image of the gold plaque under magnetic stirrer anchor obtained from reaction between IPrAuCl **1** and AcONa after 1 week at r.t.; B) EDX spectrum of the gold plaque obtained from reaction between IPrAuCl **1** and AcONa after 1 week at r.t.

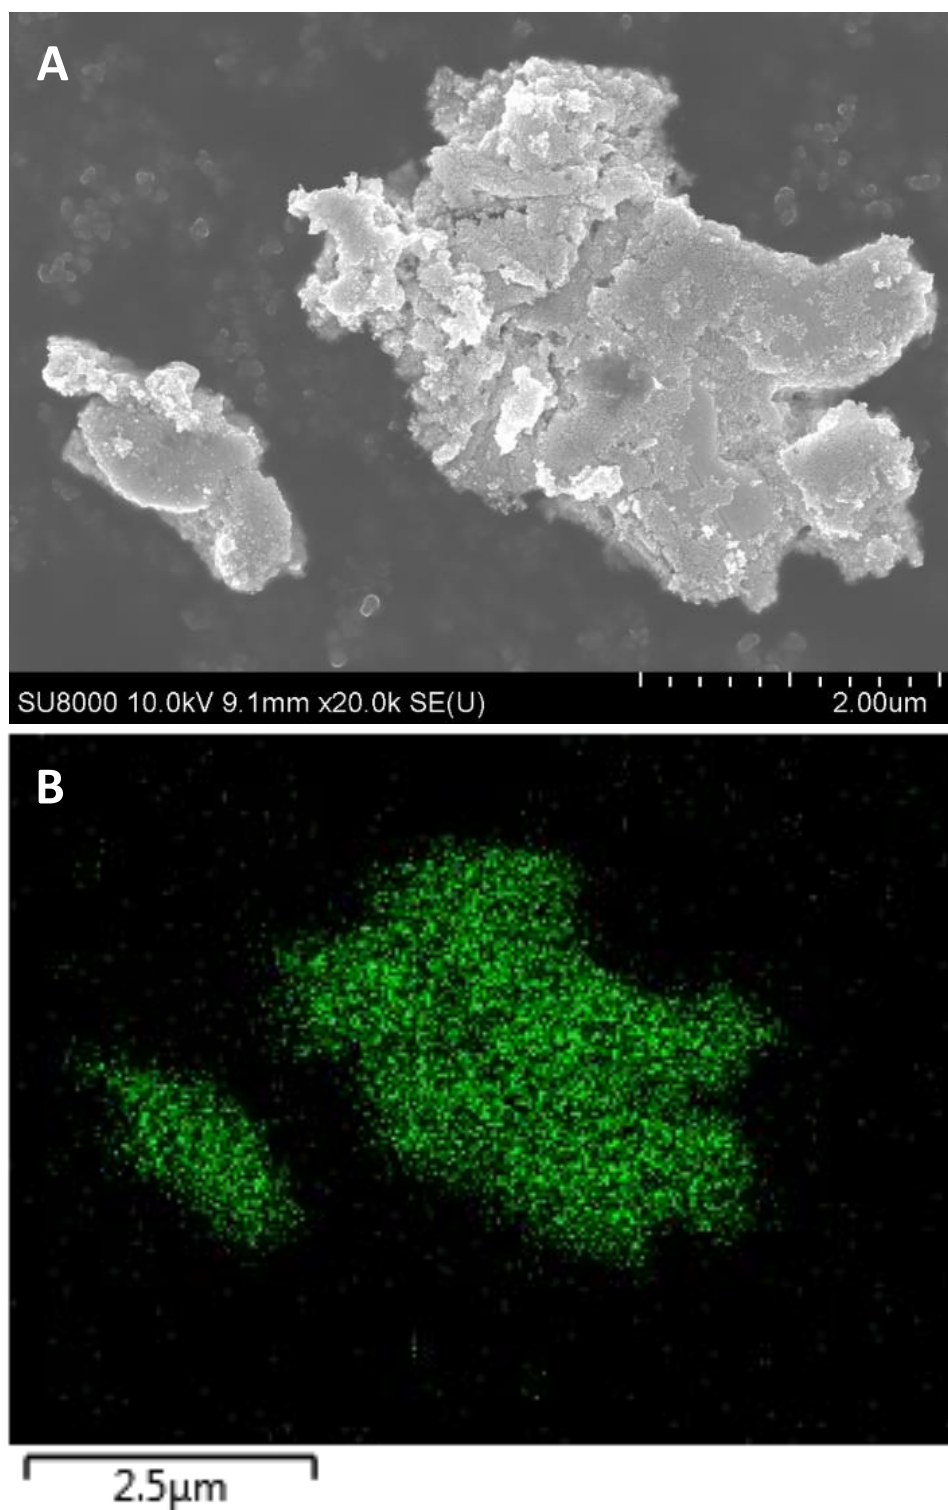

**Figure S27.** A) SEM image of gold plaque under glass vial obtained from synthesis of complex **3b** at r.t. B) EDX element mapping of gold plaque under glass vial obtained from synthesis of complex **3b** at r.t.

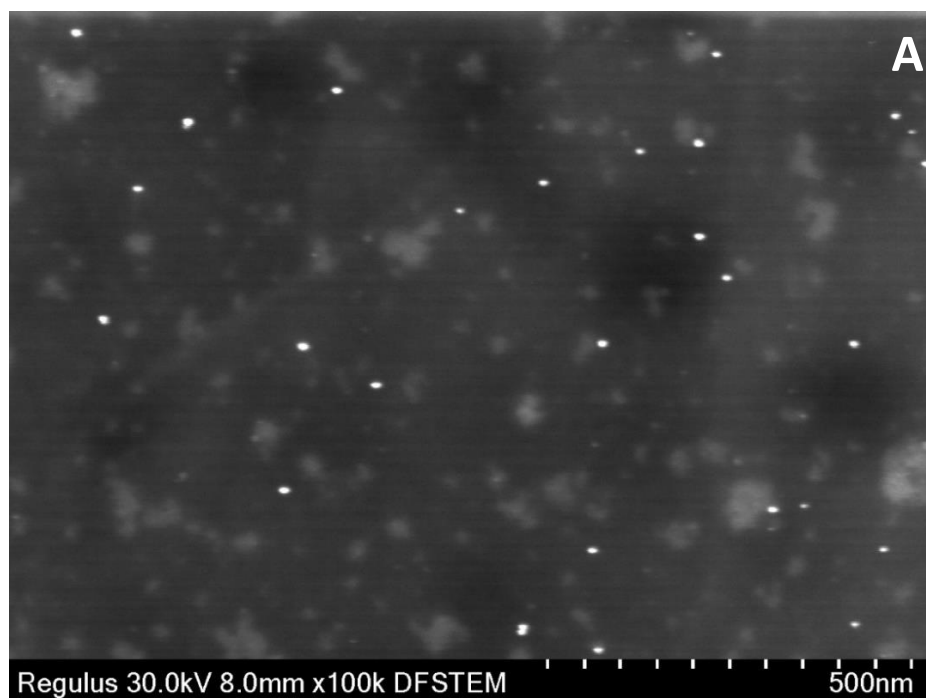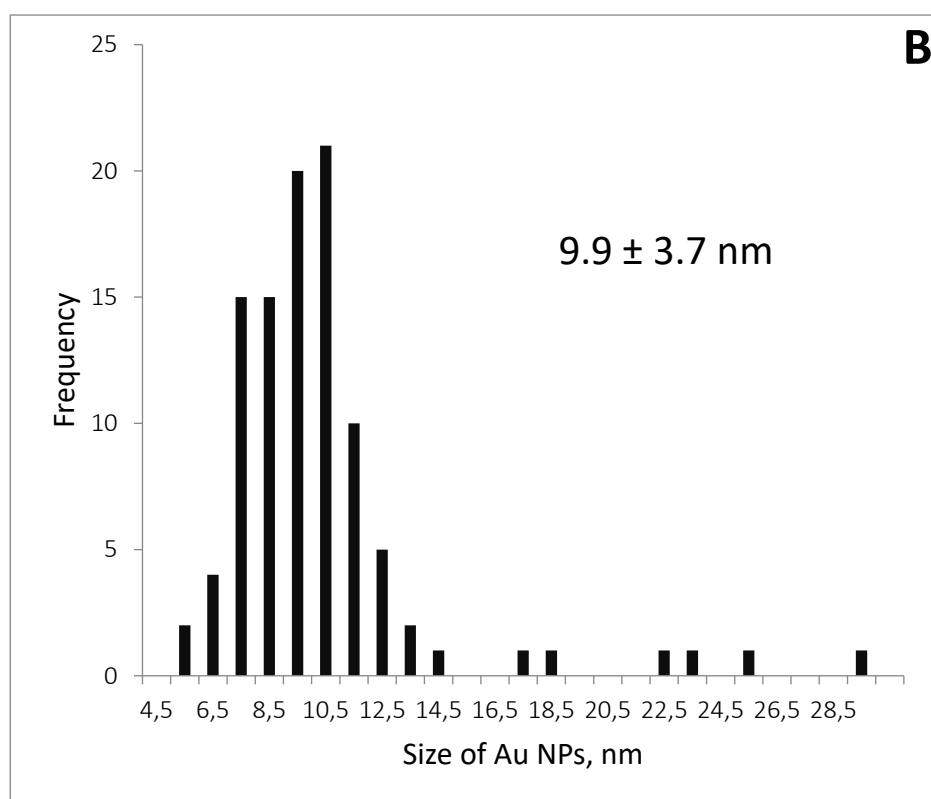

**Figure S28.** A) DFSTEM image of Au NPs obtained after heating of complex **3g** at 120°C in DMF-*d*<sub>7</sub> for 30 min; B) Au NPs size distribution histogram obtained from DFSTEM micrographs after heating complex **3g** at 120°C in DMF-*d*<sub>7</sub> for 30 min.

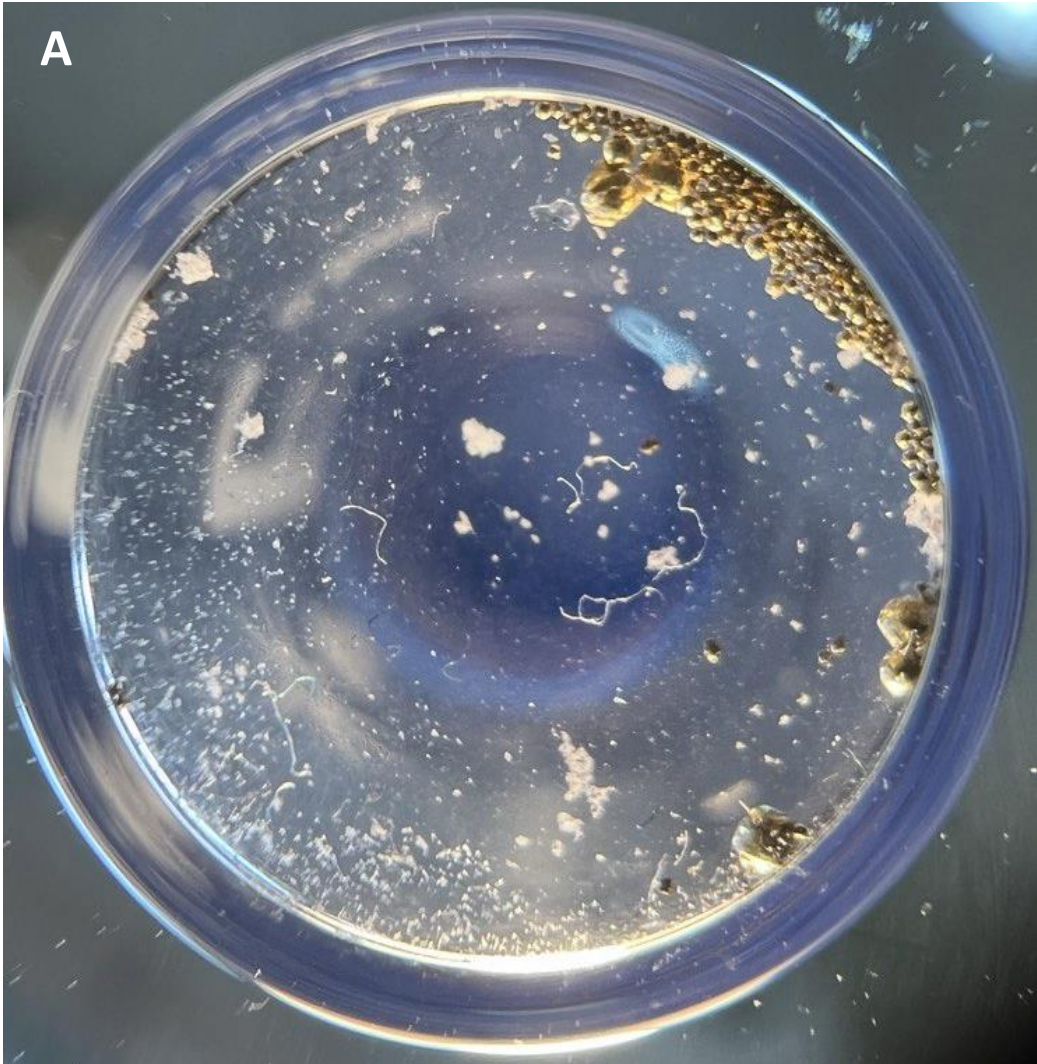



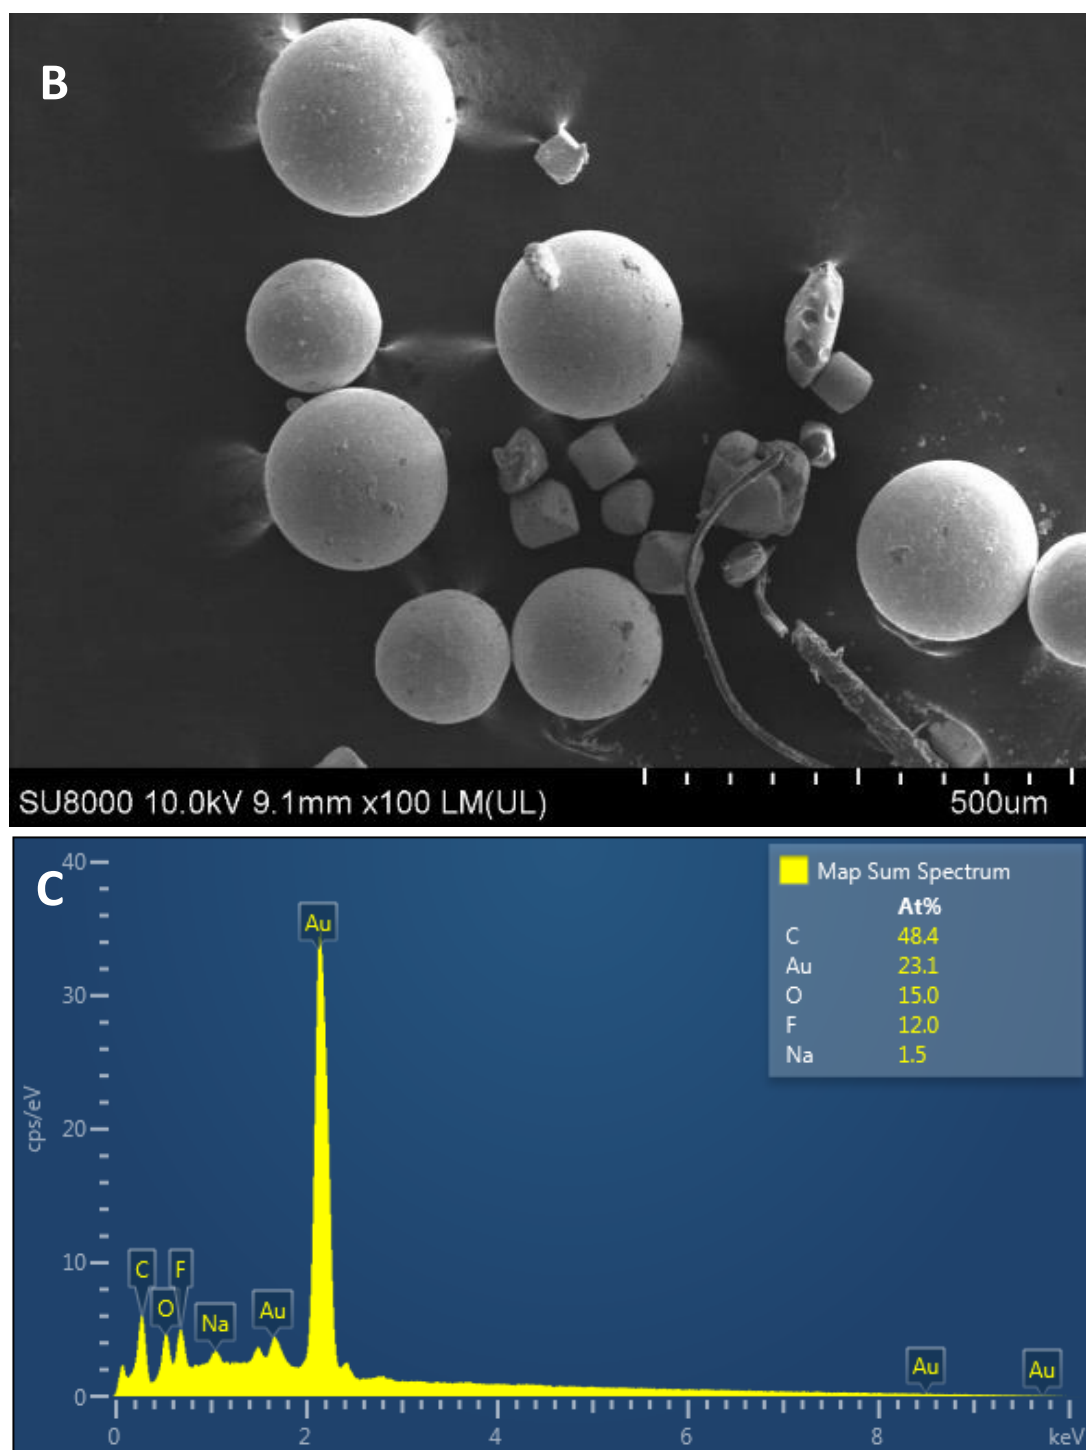

**Figure S29.** A) Picture of gold microspheres; B) SEM image of gold microspheres obtained from synthesis IPrAuCl **1** at r.t.; C) EDX spectrum of the gold microspheres obtained from synthesis of complex **1**.

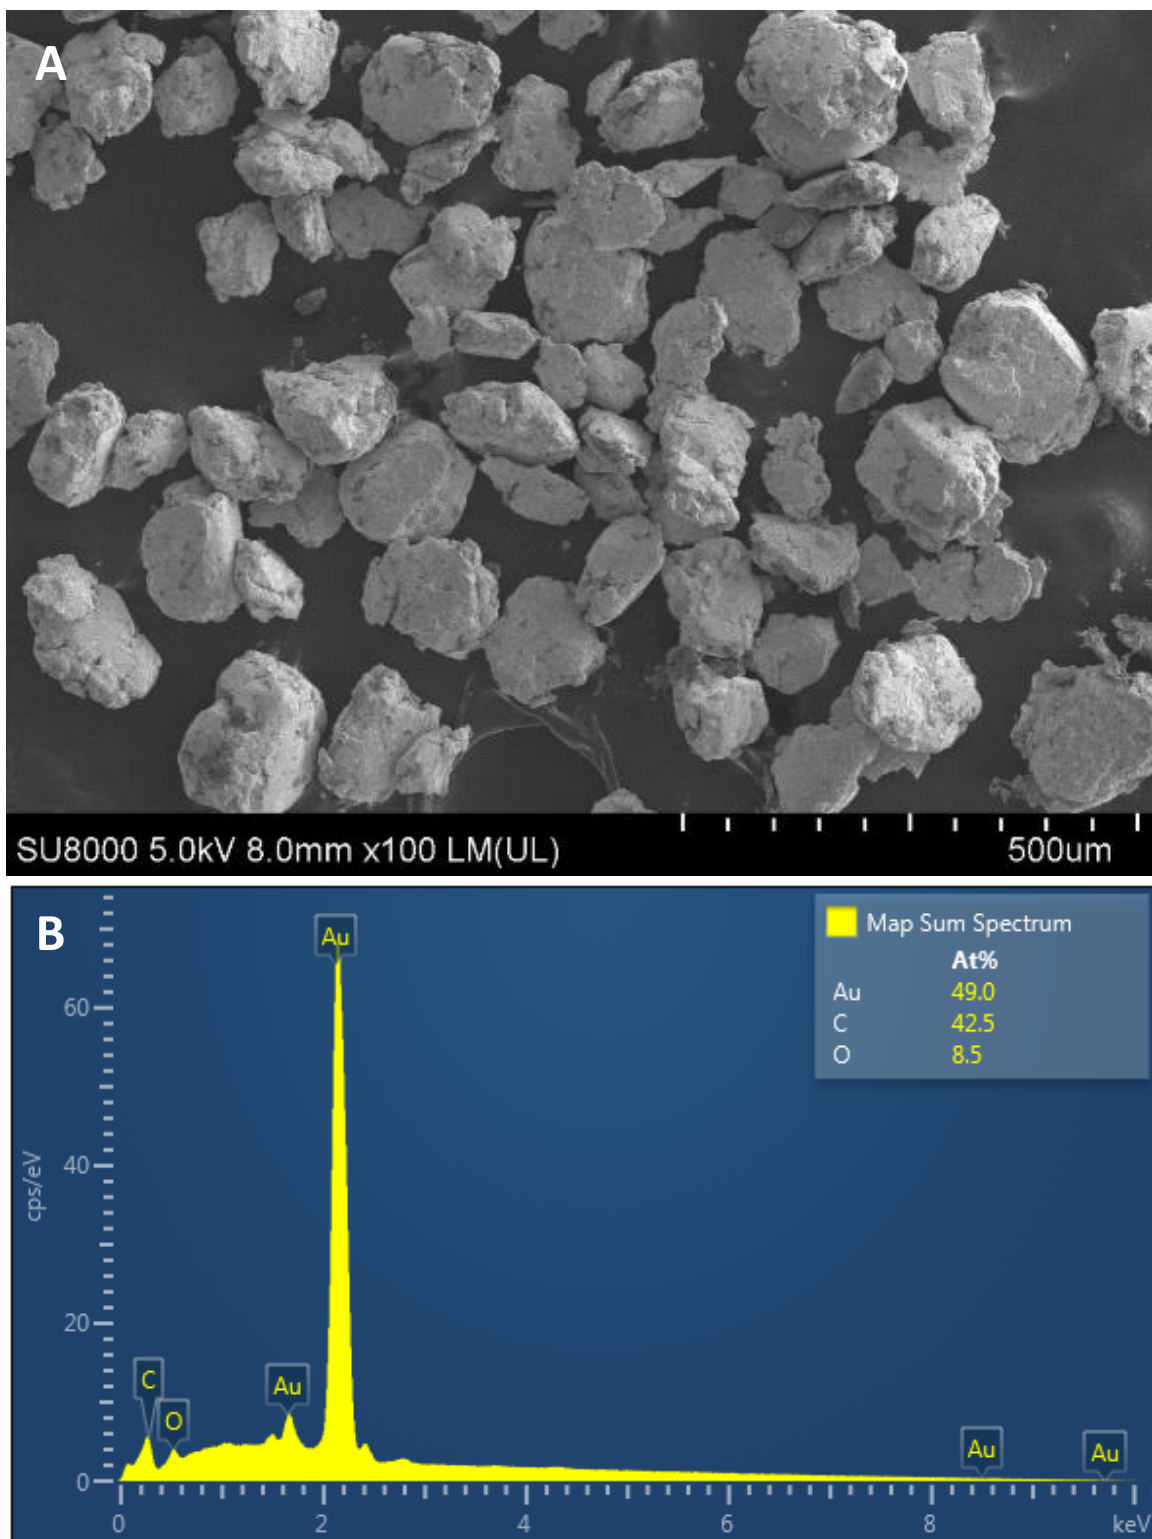

**Figure S30.** A) SEM image of gold microparticles obtained from synthesis IPrAuCl **1** at r.t.; B) EDX spectrum of the gold particles obtained from synthesis of complex **1**.



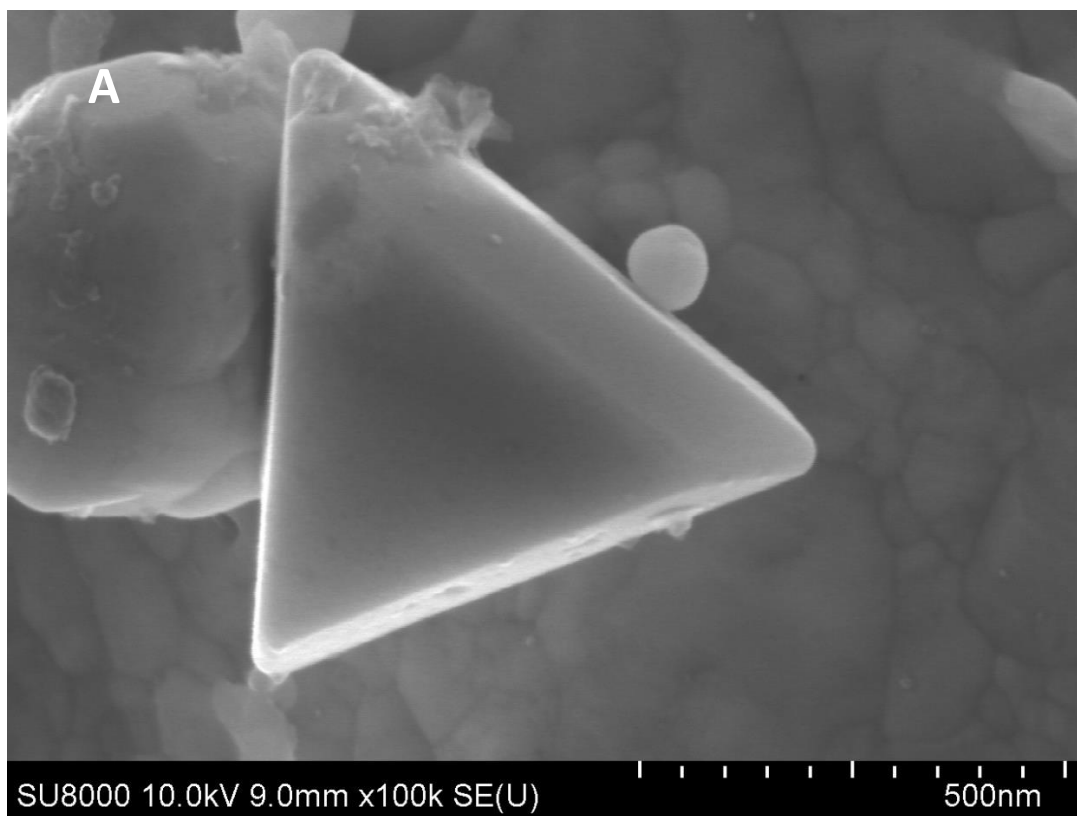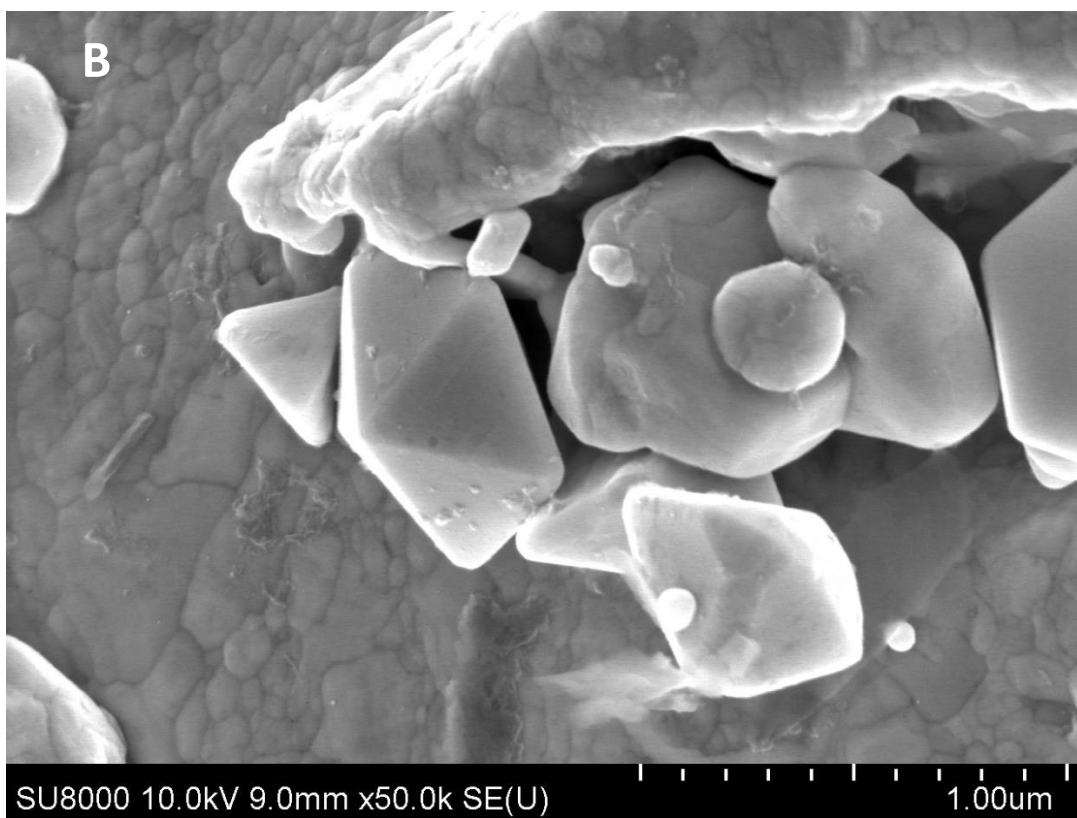

**Figure S31.** SEM images of gold triangle shape crystals obtained from synthesis IPrAuCl **1** at r.t.

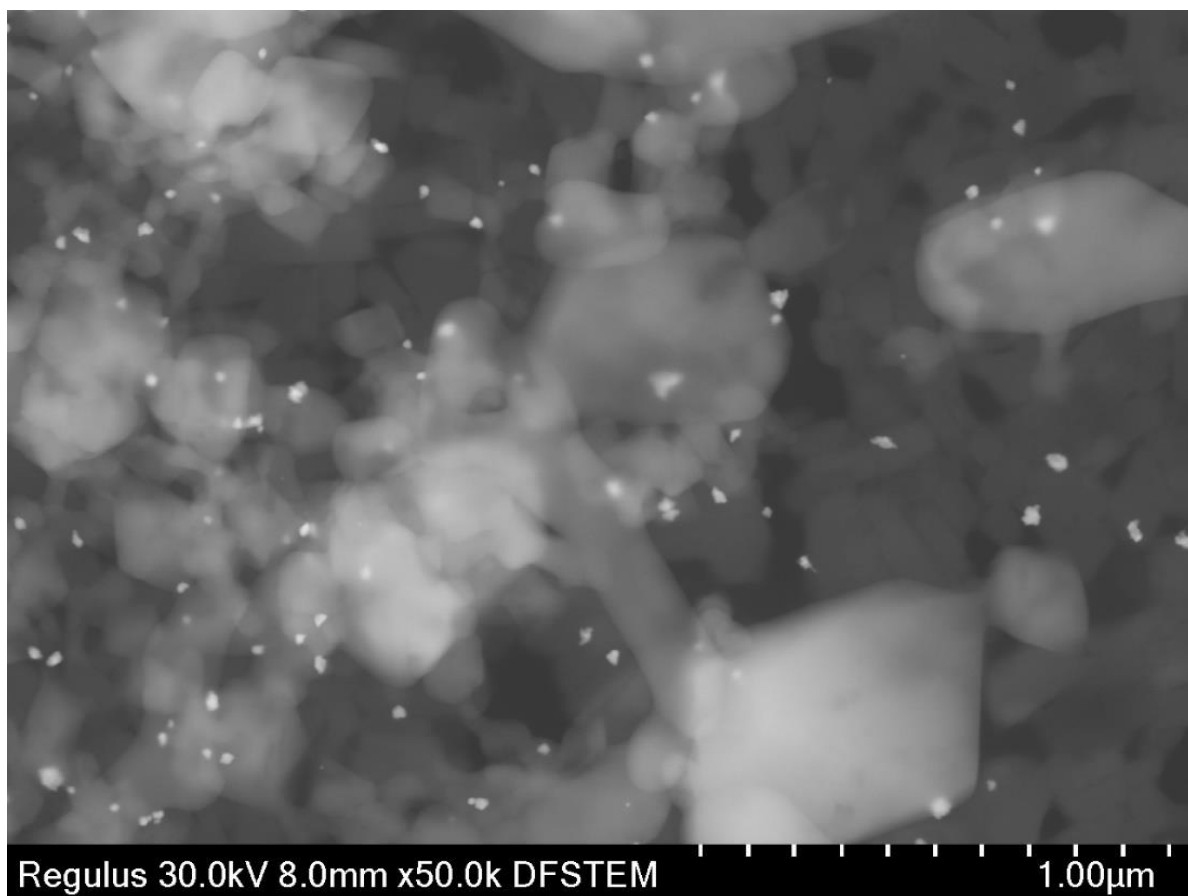

**Figure S32.** DFSTEM image of Au NPs obtained from tranformation complex **2** to complex **1** in acetone- $d_6$  at 60°C for 15 minutes.

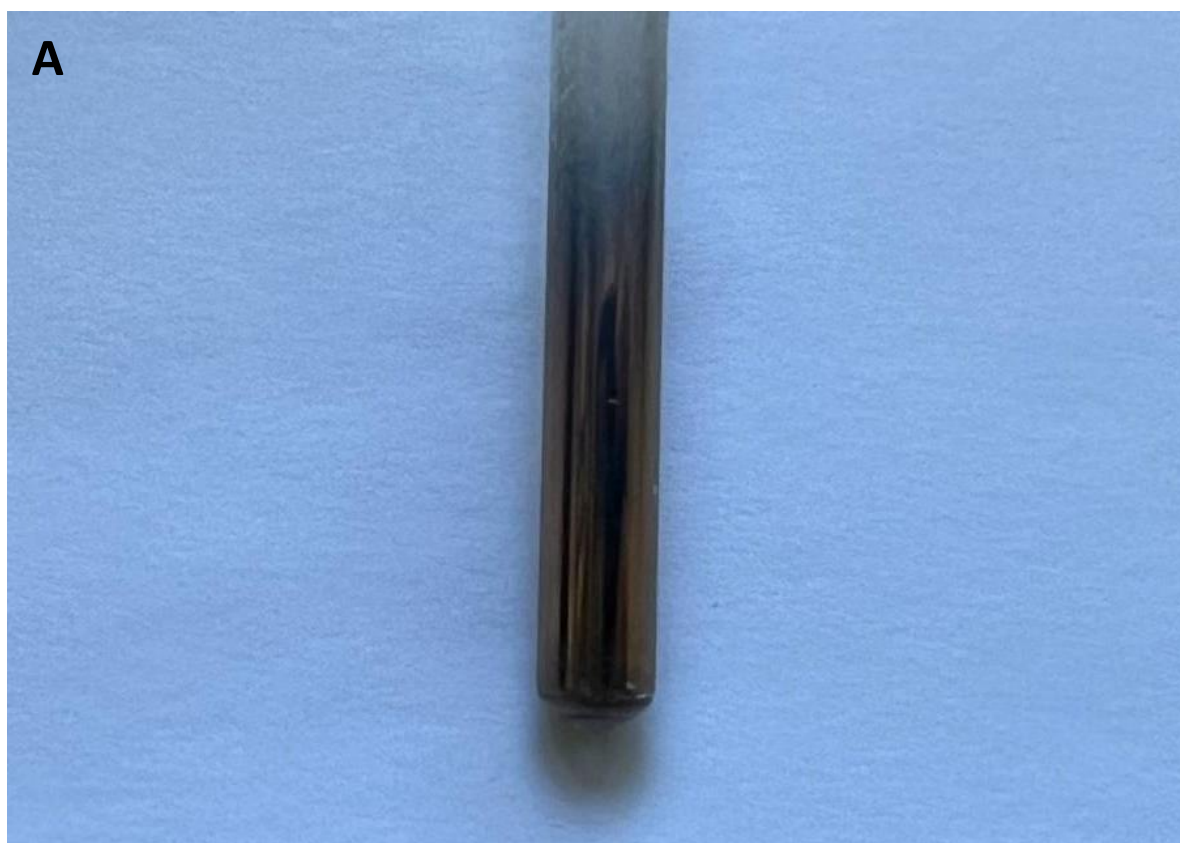

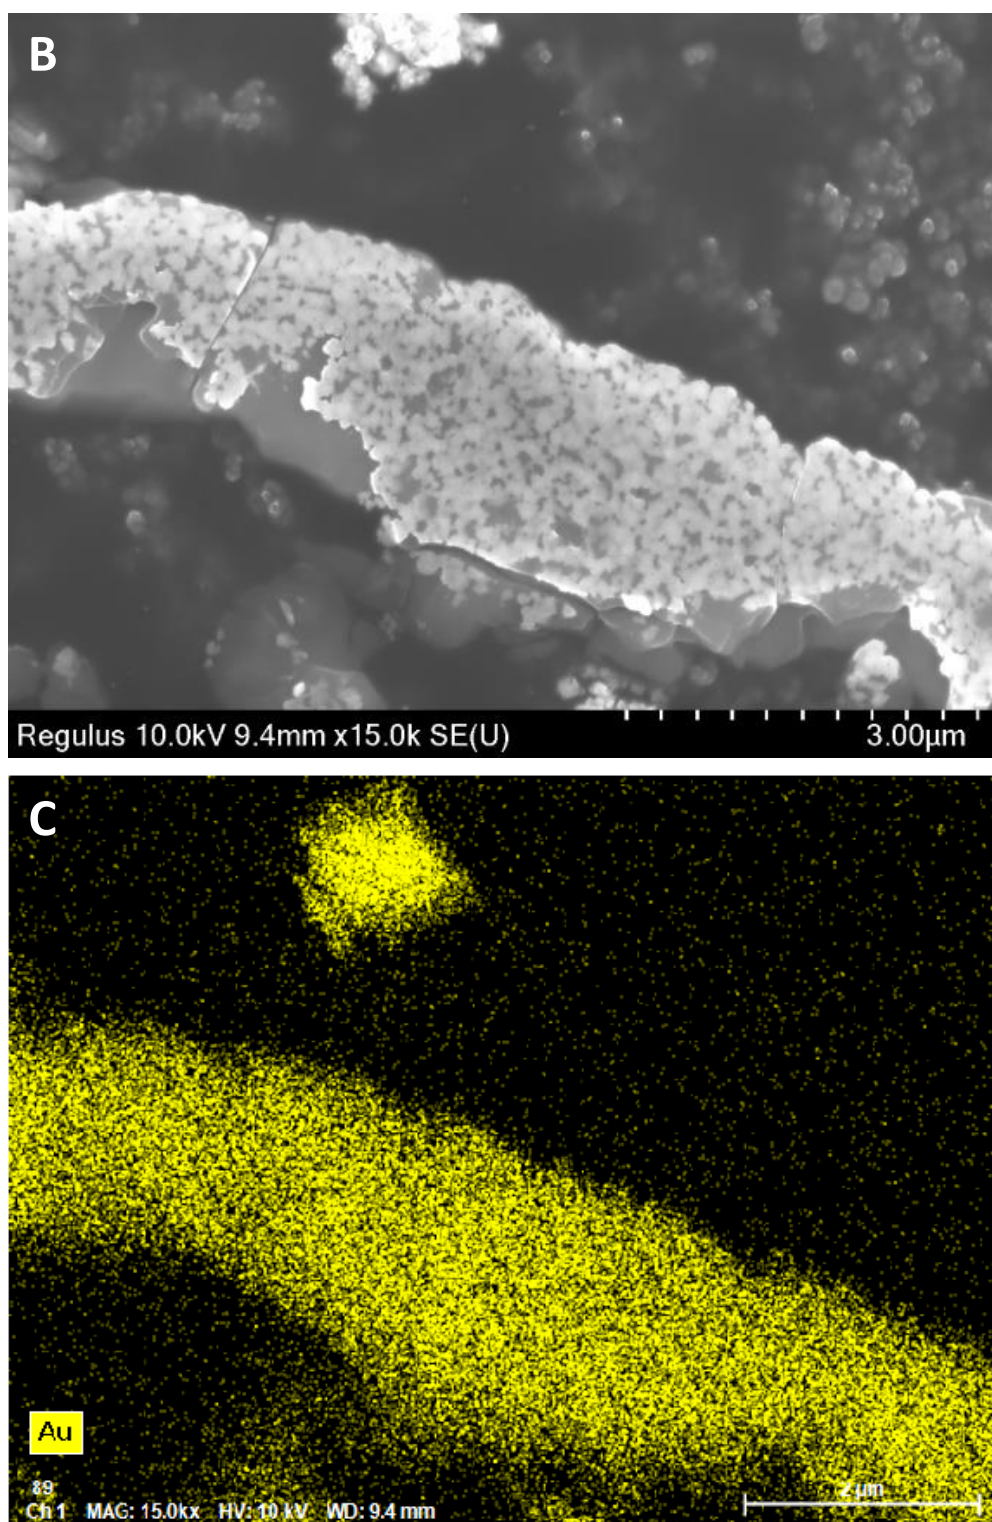

**Figure S33.** A) Picture of the gold plaque under NMR tube surface after reaction between complex **3g** and 1 eq.  $\text{SO}_2\text{Cl}_2$  at r.t.; B) SEM image of gold plaque under NMR tube obtained from reaction of complex **3g** with 1 eq.  $\text{SO}_2\text{Cl}_2$  at r.t.; C) EDX element mapping of Au NPs obtained from gold plaque on the NMR tube surface after reaction of complex **3g** with 1 eq.  $\text{SO}_2\text{Cl}_2$  at r.t.

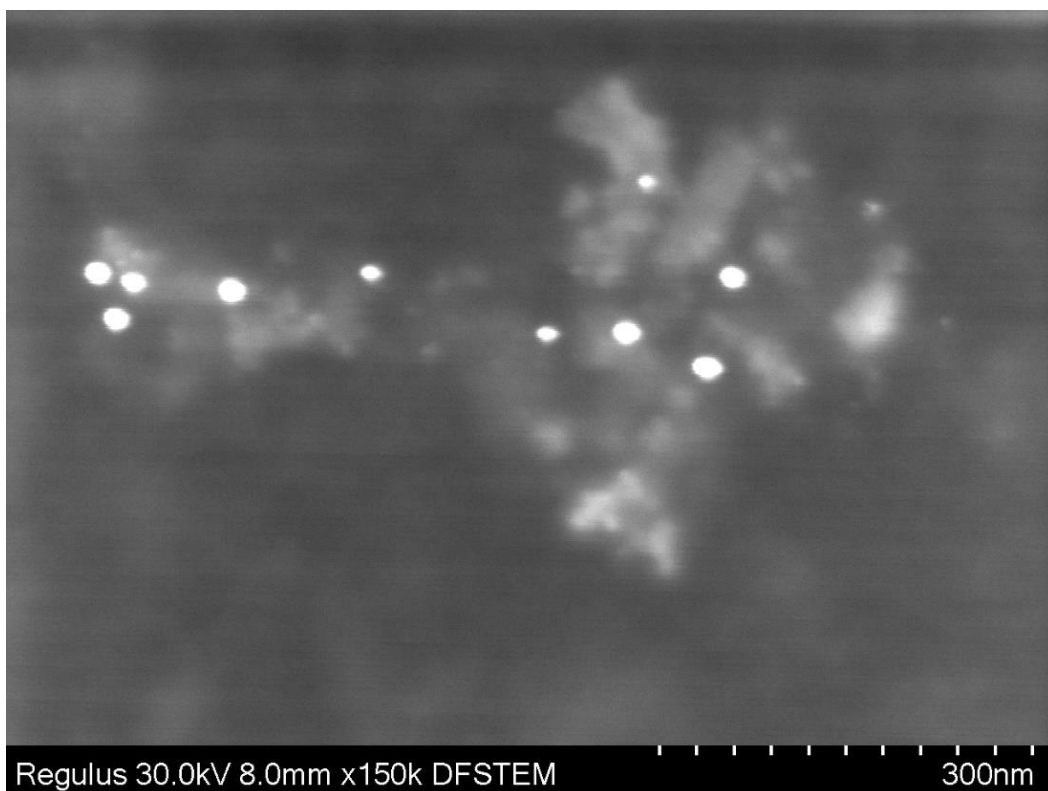

**Figure S34.** DFSTEM image of Au NPs obtained after heating of complex **4a** at 100 °C in DMSO- $d_6$  for 15 mins.

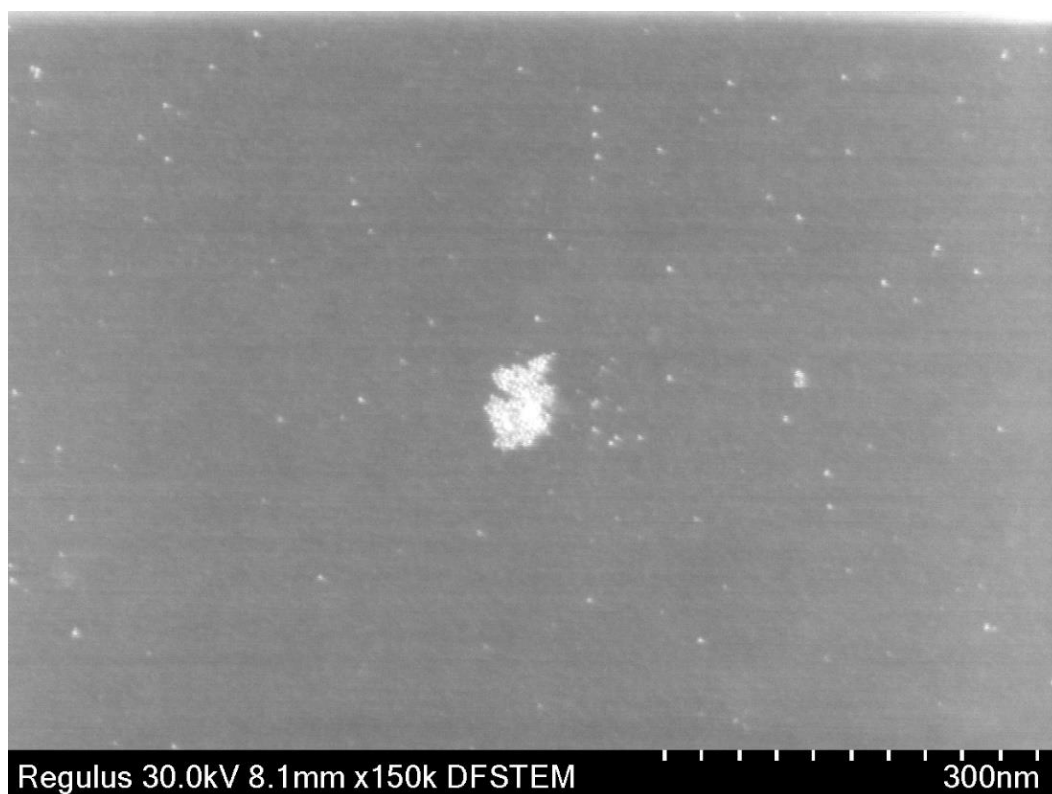

**Figure S35.** DFSTEM image of Au NPs obtained after degradation of complex **4a** in the presence of NaBH<sub>4</sub>/EtOH.

**Table S2.** The connection between molecular and ionic gold complexes and Au nano- and microparticles. <sup>a</sup> Detected via ESI-HRMS study; <sup>b</sup> Detected by NMR study; <sup>c</sup> Rationalized size of Au NPs obtained with size distribution histogram from SEM micrographs.

| Starting reagents                                                        |                                         | Products                                                                                                       |                                                                                      | Medium                                      | Temperature/<br>time |
|--------------------------------------------------------------------------|-----------------------------------------|----------------------------------------------------------------------------------------------------------------|--------------------------------------------------------------------------------------|---------------------------------------------|----------------------|
|                                                                          |                                         | Au complexes                                                                                                   | [Au] particles                                                                       |                                             |                      |
| IPrAuCl <b>1</b> (1 eq.)<br>+ alkyne (1.1 eq.)<br>+ AcONa (3 eq.)        |                                         | Complex <b>3b</b> <sup>a,b</sup>                                                                               | Au nano- and microparticles from 20 nm to 2 $\mu$ m<br>Gold plaque on the glass vial | CH <sub>2</sub> Cl <sub>2</sub> :EtOH = 1:1 | r.t.<br>12 h         |
| THT-Au-Cl (1 eq.)<br>+ IPr*HCl (1 eq.)<br>+ NaHCO <sub>3</sub> (4.1 eq.) |                                         | IPrAuCl <b>1</b> <sup>a,b</sup>                                                                                | Au microparticles<br>100-200 $\mu$ m                                                 | CH <sub>2</sub> Cl <sub>2</sub> :MeOH=5:1   | r.t.<br>3 days       |
| THT-Au-Cl (1 eq.)<br>+ IPr*HCl (1 eq.)<br>+ NaHCO <sub>3</sub> (4.1 eq.) |                                         | IPrAuCl <b>1</b> <sup>a,b</sup>                                                                                | Au microparticles<br>50-100 $\mu$ m                                                  | CH <sub>2</sub> Cl <sub>2</sub> :MeOH=5:1   | r.t.<br>3 days       |
| IPr[AuCl <sub>2</sub> ] <b>2</b>                                         |                                         | IPrAuCl <b>1</b> <sup>a,b</sup>                                                                                | Au NPs<br>50 nm and smaller                                                          | acetone- <i>d</i> <sub>6</sub>              | 60°C<br>15 min       |
| Complex <b>3g</b> (1 eq.)<br>+ SO <sub>2</sub> Cl <sub>2</sub> (2 eq.)   |                                         | [IMes <sub>2</sub> Au] <sup>+</sup> <sup>a</sup><br>+NHC-C (NHC-ethynyl) <sup>a</sup><br>+NHC-H <sup>a,b</sup> | Au NPs<br>100 nm<br>Gold plaque on the glass vial                                    | CDCl <sub>3</sub>                           | r.t.<br>2 week       |
| Complex <b>4a</b> (1 eq.)<br>+ NaBH <sub>4</sub> (1 eq.)                 |                                         | Diyne <sup>a,b</sup><br>+NHC-C (NHC-Me) <sup>a</sup><br>+NHC=O <sup>a</sup>                                    | Au NPs<br>~1 nm                                                                      | EtOH                                        | r.t.<br>15 min       |
| Complex <b>3g</b>                                                        |                                         | Complex <b>3g</b> <sup>a</sup>                                                                                 | Au NPs<br>(9.9 $\pm$ 3.7) nm <sup>c</sup>                                            | DMF- <i>d</i> <sub>7</sub>                  | 140 °C<br>30 min     |
| Complex <b>4a</b>                                                        |                                         | Complex <b>3a</b> <sup>a</sup>                                                                                 | Au NPs<br>10 nm                                                                      | DMSO- <i>d</i> <sub>6</sub>                 | 100 °C<br>15 min     |
| Complex <b>4a</b><br>+ PhI(OAc) <sub>2</sub> (2 eq.)                     |                                         | Complex <b>3a</b> <sup>a</sup>                                                                                 | Au NPs<br>(7.5 $\pm$ 1.2) nm <sup>c</sup>                                            | DMSO- <i>d</i> <sub>6</sub>                 | 120 °C<br>15 min     |
| IPrAuCl <b>1</b> (1 eq.)<br>+ AcONa (1 eq.)                              |                                         | IPrAuCl <b>1</b> <sup>a,b</sup>                                                                                | Au nano- and microparticles from 50 nm to 50 $\mu$ m<br>Au plaque on the anchor      | CH <sub>2</sub> Cl <sub>2</sub> :EtOH = 1:1 | r.t.<br>3 week       |
| Complex <b>3f</b><br>(1 eq.)                                             | + 2 eq. SO <sub>2</sub> Cl <sub>2</sub> | NHC-H <sup>a</sup><br>(IPr-H)                                                                                  | –                                                                                    | CDCl <sub>3</sub>                           | r.t.<br>1 h          |
|                                                                          | + 1 eq. KOH                             | NHC-H <sup>a</sup><br>(IPr-H)                                                                                  | –                                                                                    | DMSO- <i>d</i> <sub>6</sub>                 | r.t.<br>1 h          |
| Complex <b>3a</b> (1 eq.)                                                |                                         | +NHC=O <sup>a</sup>                                                                                            | –                                                                                    | 1,4-dioxane                                 | 120°C<br>1 h         |
| Au NPs<br>+ IMes*HCl (1 eq.)<br>+ <i>t</i> -BuOK (1 eq.)                 |                                         | [IMes <sub>2</sub> Au] <sup>+</sup> <sup>a</sup><br>+NHC=O <sup>a</sup>                                        | –                                                                                    | THF                                         | 90°C<br>1 h          |

## 7. ESI-HRMS and NMR study of the deuteration pathway of gold complexes

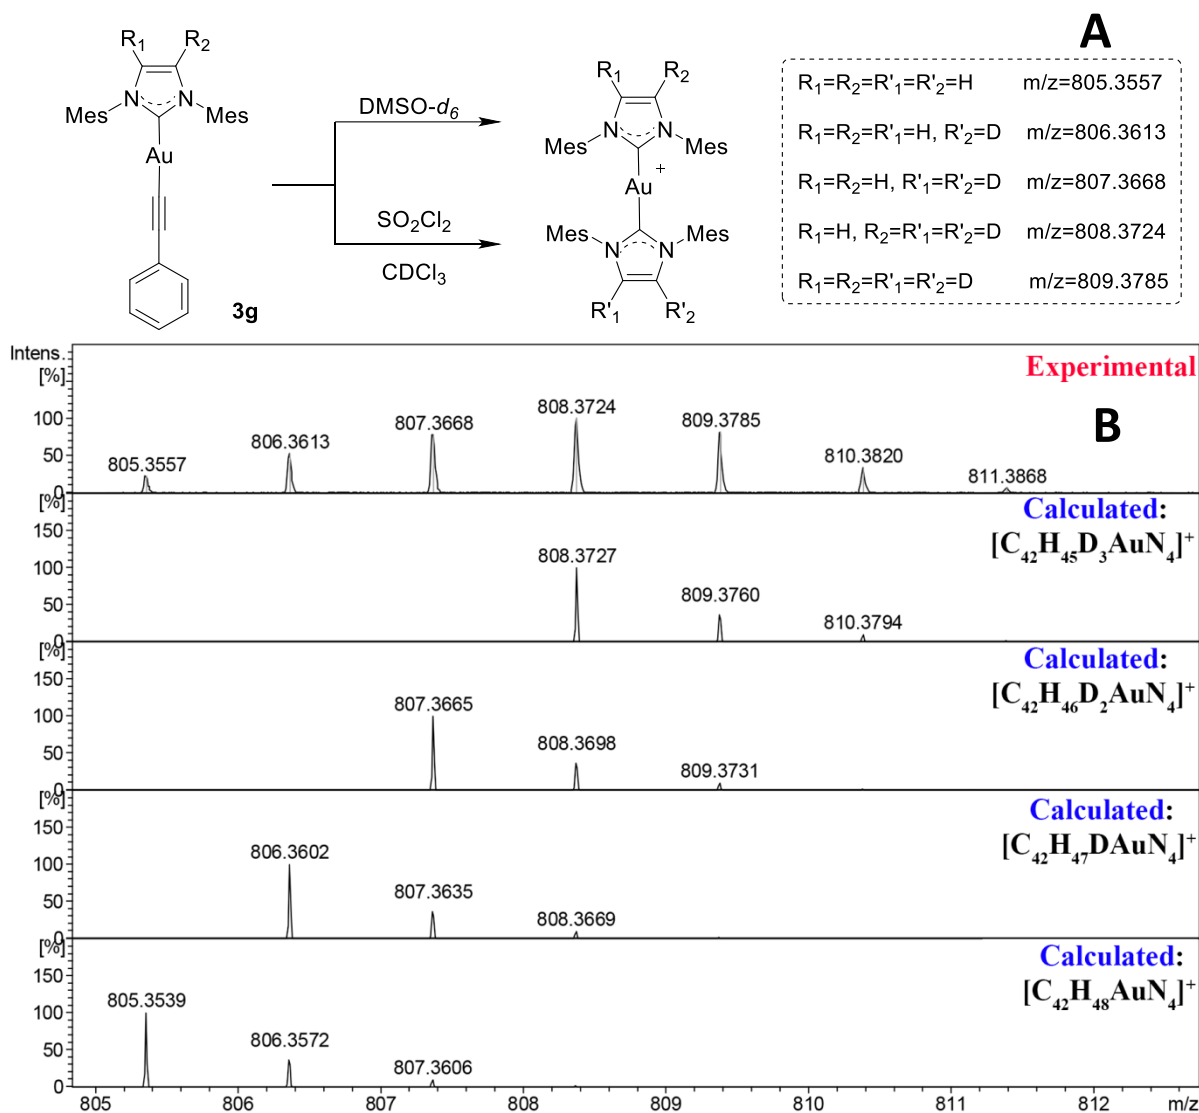

**Figure S36.** A) Scheme of the deuteration process of complex **3g**; B) Experimental and theoretical ESI-(+)HRMS spectrum of the reaction mixture after 1 h of the deuteration process of complex **3g** in DMSO-*d*<sub>6</sub>, expanded to the homoleptic bis-NHC gold(I) complex [IMes<sub>2</sub>Au+H]<sup>+</sup> region. Sample diluted in CH<sub>3</sub>CN.

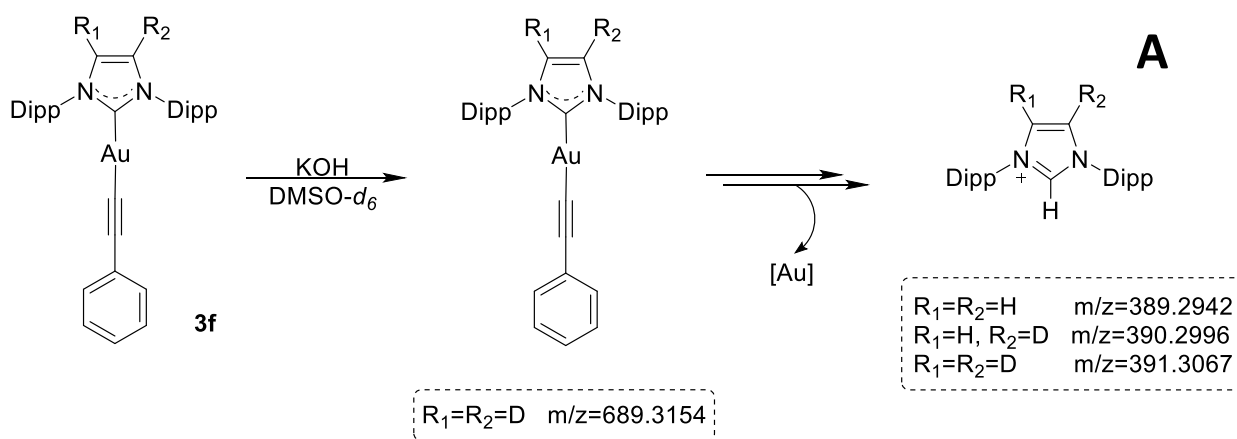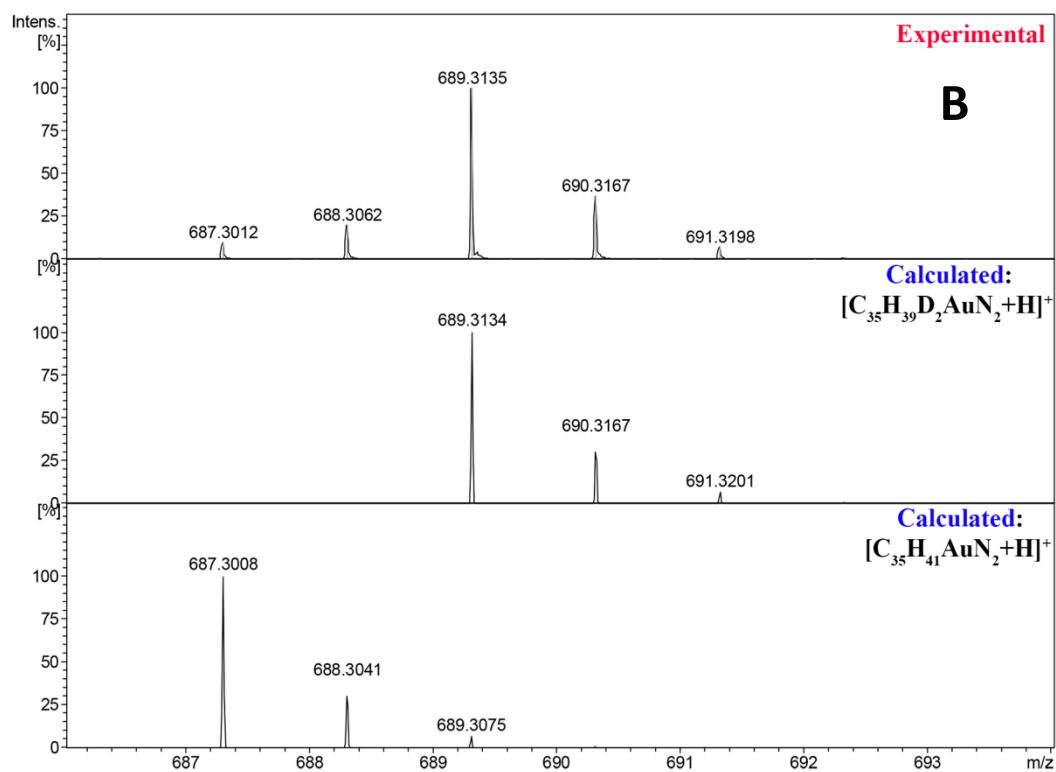



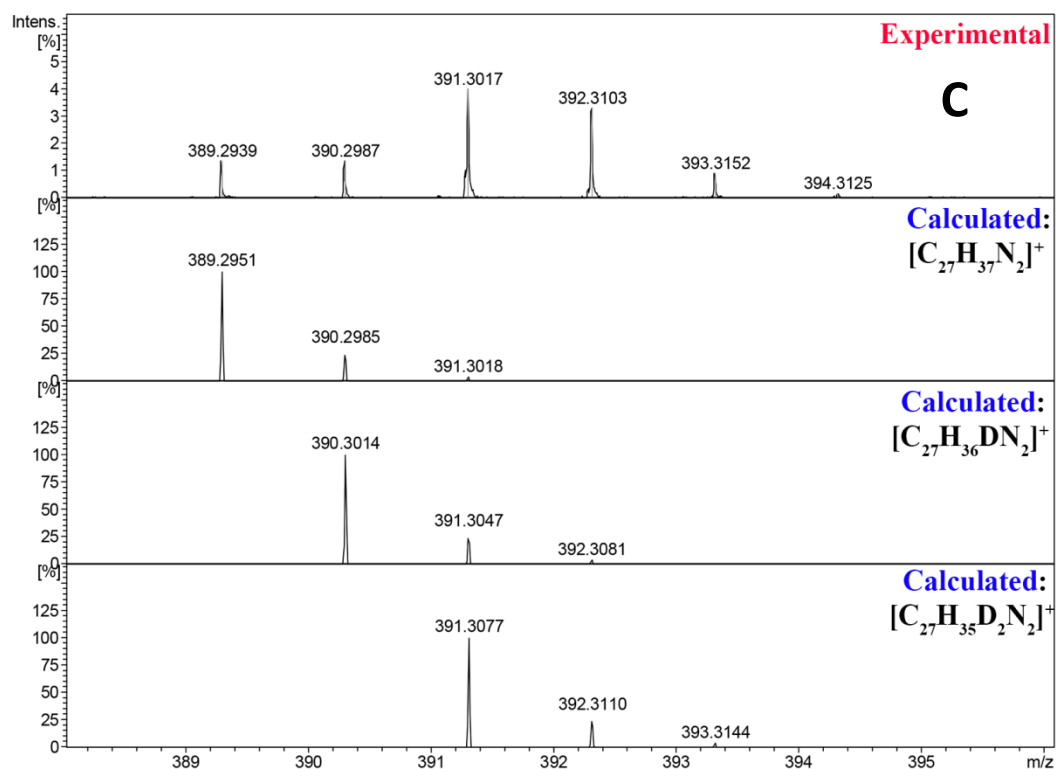

**Figure S37.** A) Scheme of the deuteration process of complex **3f**; B) Experimental and theoretical ESI-(+)-HRMS spectrum of the reaction mixture after 1 h of the deuteration process of complex **3f** in DMSO- $d_6$  catalyzed by KOH, expanded to the heteroleptic Au(I) complex [NHC-Au(I)-alkynyl+H] $^+$  region. Sample diluted in CH $_3$ CN; C) Experimental and theoretical ESI-(+)-HRMS spectrum of the reaction mixture after 1 h of the deuteration process of complex **3f** in DMSO- $d_6$  catalyzed by KOH, expanded to the [NHC+H] $^+$  region. Sample diluted in CH $_3$ CN.



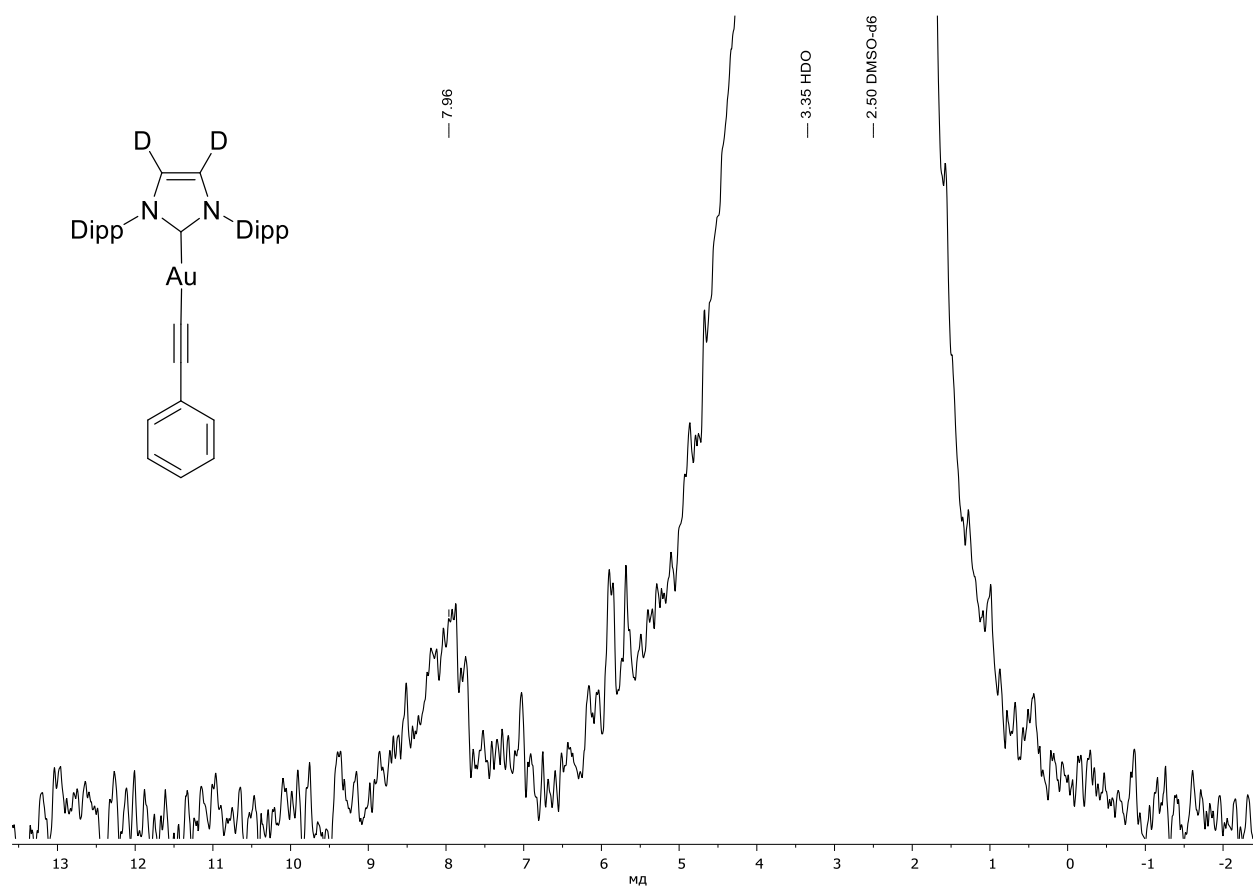

**Figure S38.** <sup>2</sup>H-NMR spectra of deuterated imidazolium fragment of NHC-Au(I) complex **3f** in DMSO-*d*<sub>6</sub> (61 MHz).

## 8. ESI-HRMS study of the dynamic behavior of gold complexes

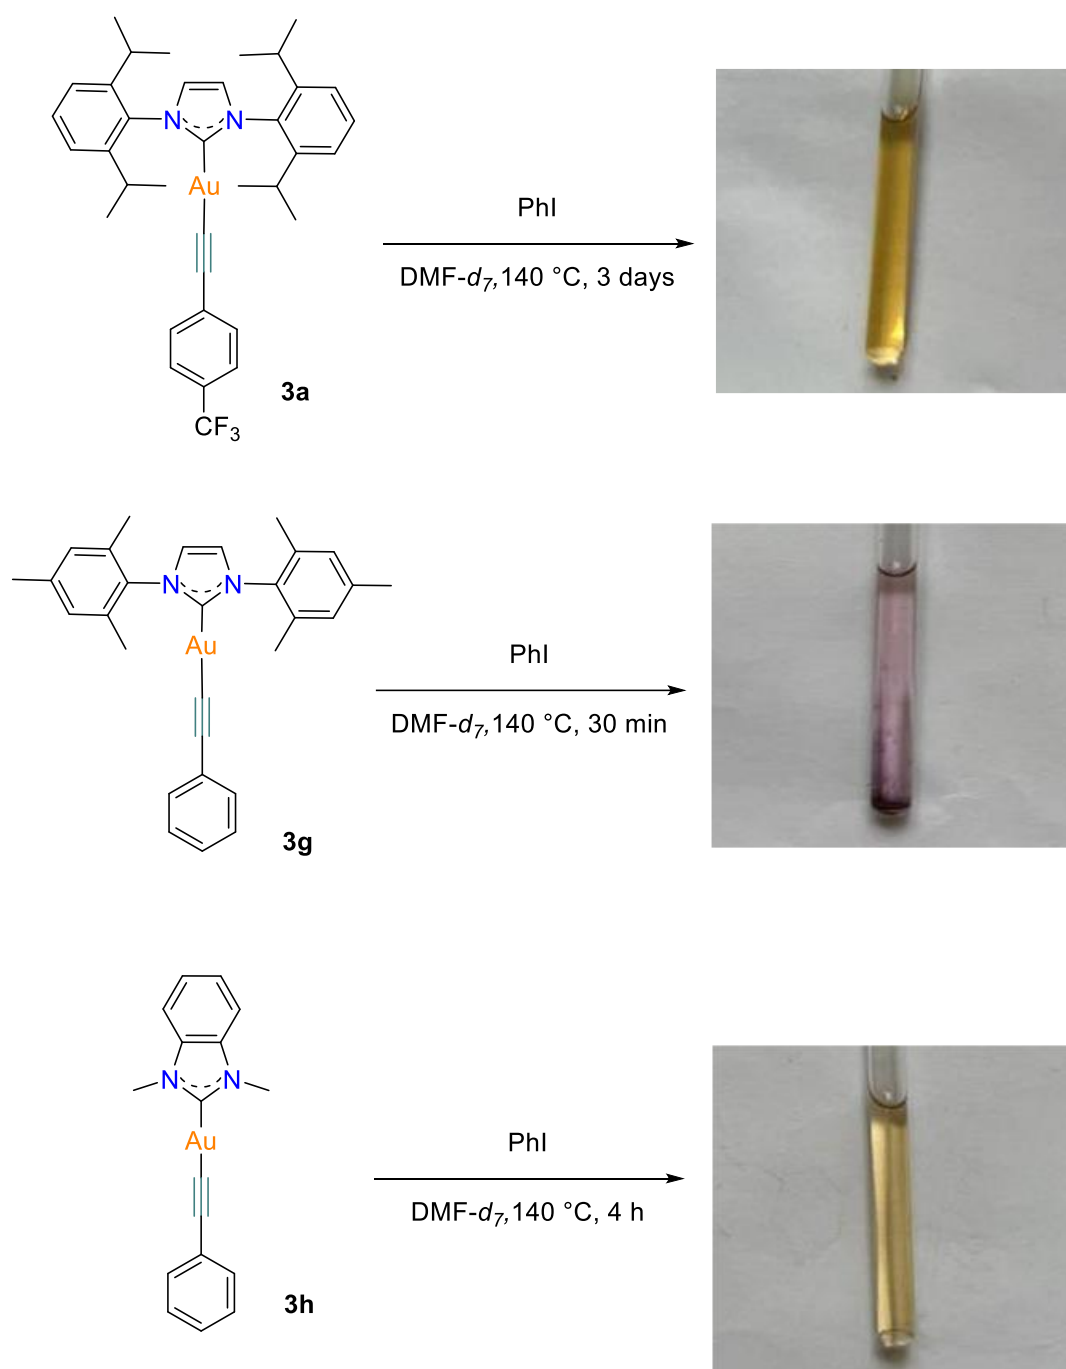

**Figure S39.** Study of the physical properties of NHC gold(I) alkynyl complexes with various NHC ligands by heating of appropriate NHC-Au(I) complexes with 1 eq. of PhI at 140 °C.

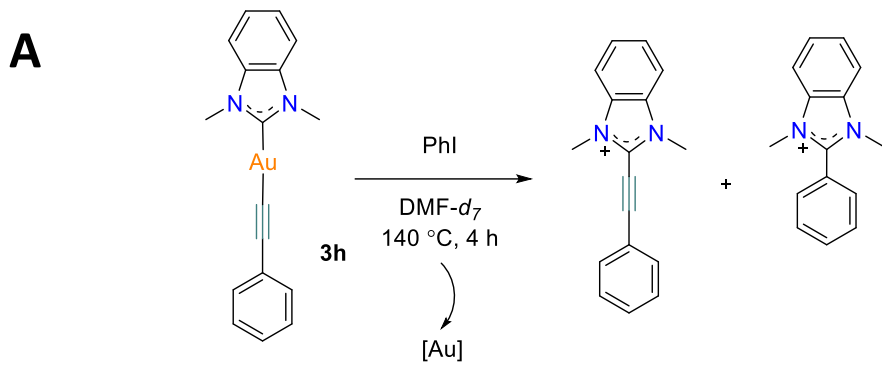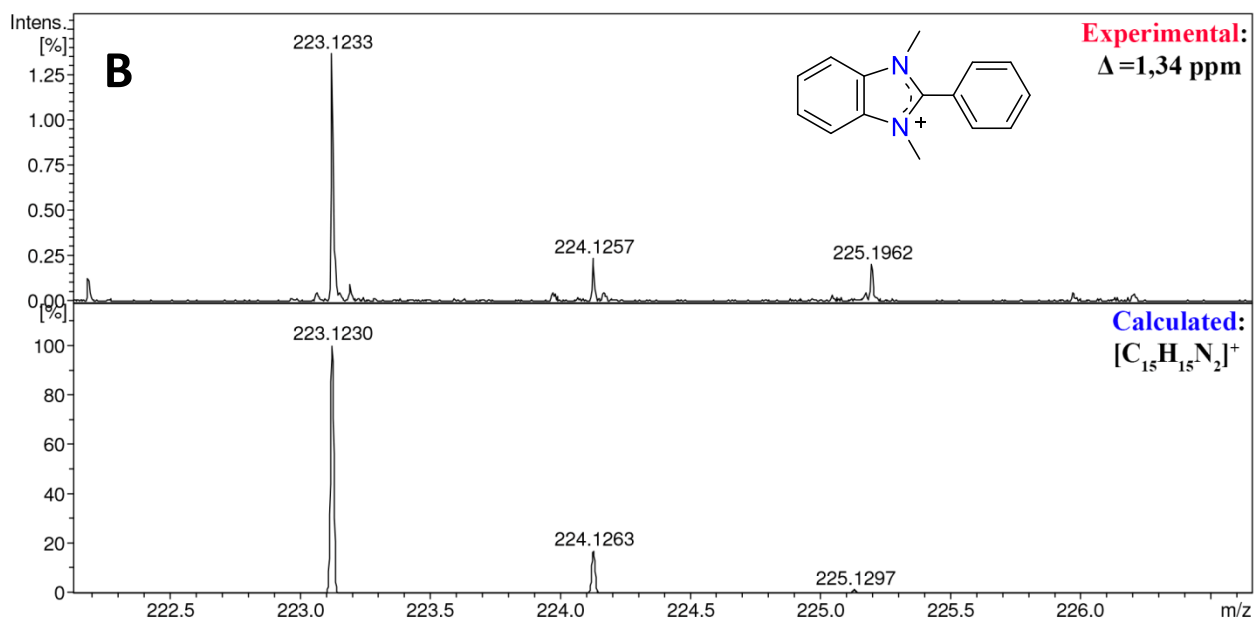

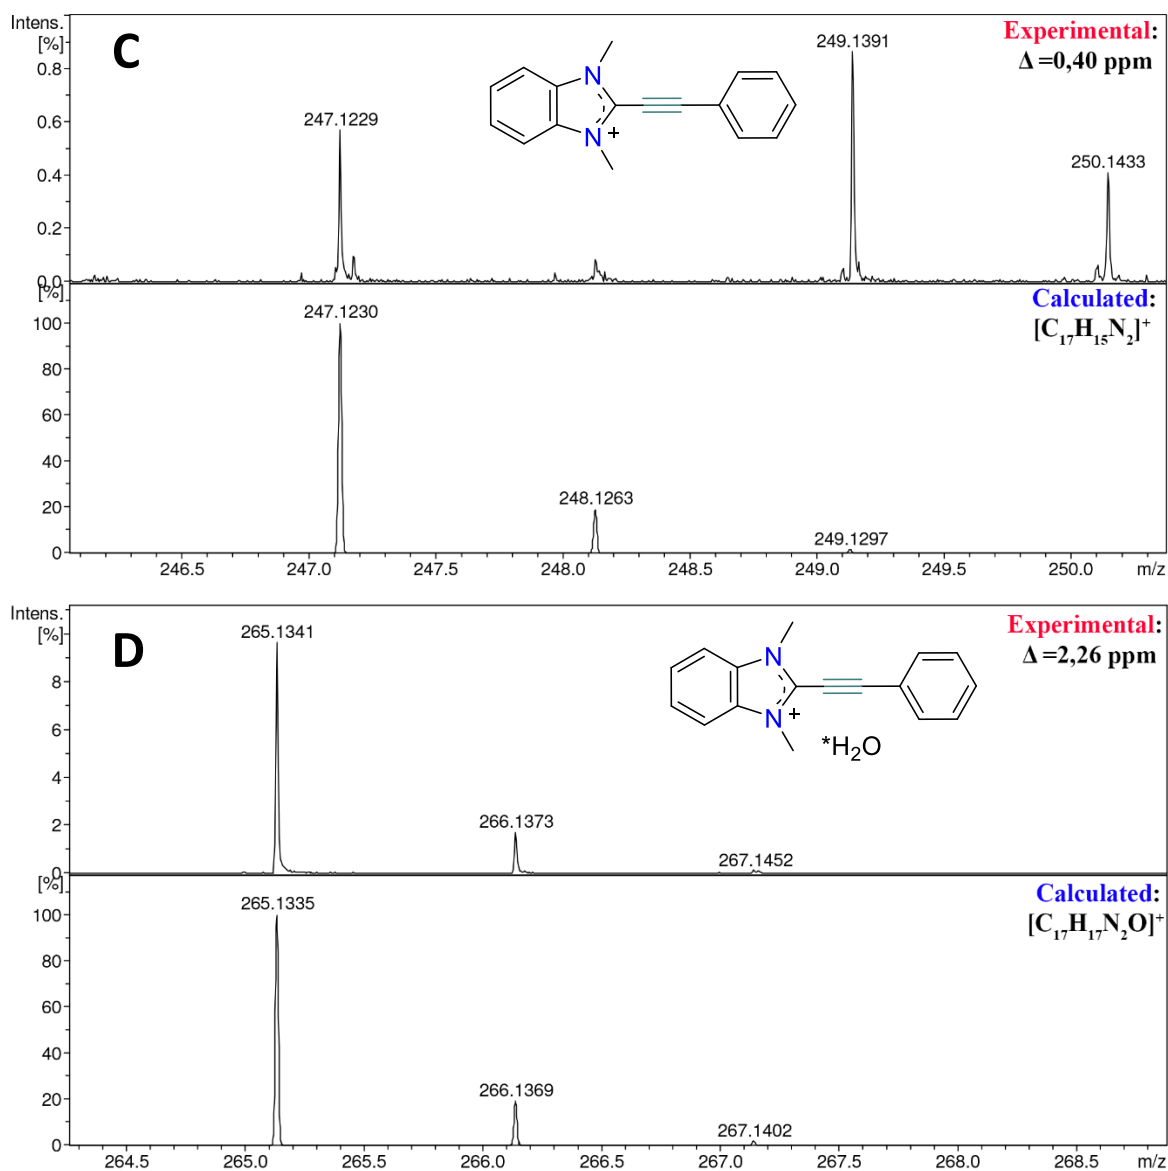

**Figure S40.** A) Scheme of the reaction; Experimental and theoretical ESI-(+)HRMS spectrum of the reaction mixture of NHC-C coupling reaction (NHC-Ph (B) and NHC-ethynyl (C), (D)) in NHC gold(I) alkynyl complex **3h** after 4 h in DMF-*d*<sub>7</sub> initiated by PhI, expanded to the [NHC+R]<sup>+</sup> region. Sample diluted in CH<sub>3</sub>CN.

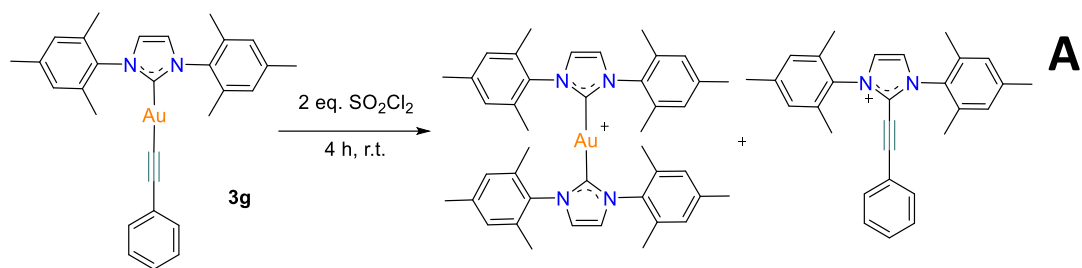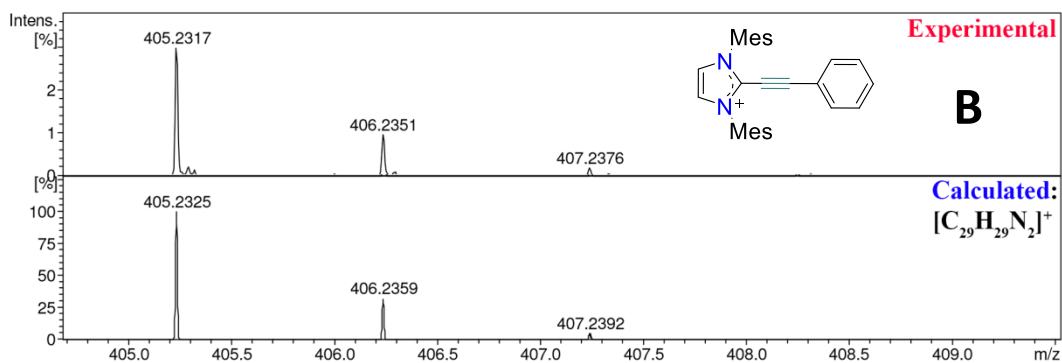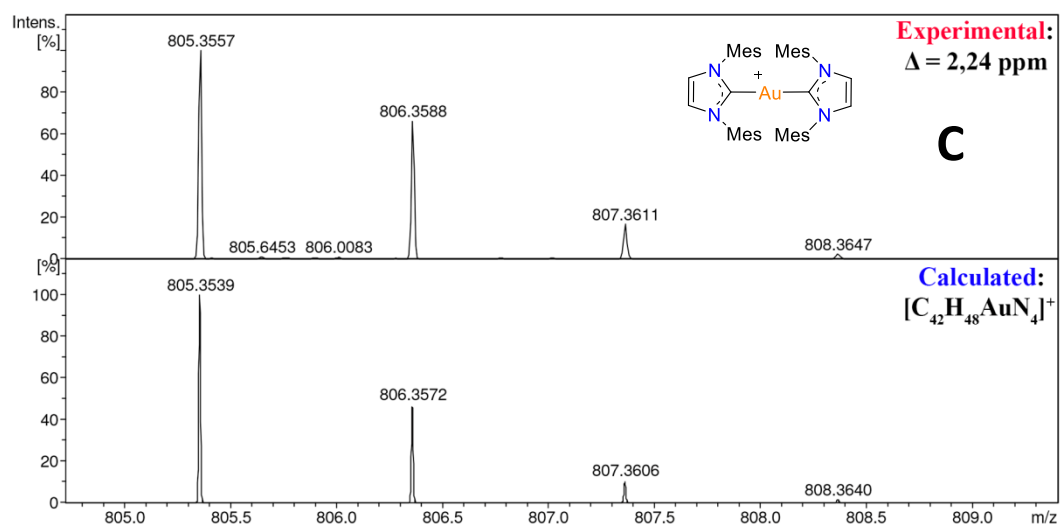

**Figure S41.** A) Scheme of the reaction; B) Experimental and theoretical ESI-(+)HRMS spectrum of the reaction mixture of NHC-C coupling reaction in NHC gold(I) alkynyl complex **3g** after 4 h in  $\text{CDCl}_3$  initiated by 2 eq.  $\text{SO}_2\text{Cl}_2$ , expanded to the  $[\text{NHC}+\text{R}]^+$  region. Sample diluted in  $\text{CH}_3\text{CN}$ . C) Experimental and theoretical ESI-(+)HRMS spectrum of the reaction mixture of simultaneous formation of homoleptic gold(I) complex in NHC gold(I) alkynyl complex **3g** after 4 h in  $\text{CDCl}_3$  initiated by 2 eq.  $\text{SO}_2\text{Cl}_2$ , expanded to the  $[\text{IMes}_2\text{Au}]^+$  region. Sample diluted in  $\text{CH}_3\text{CN}$ .

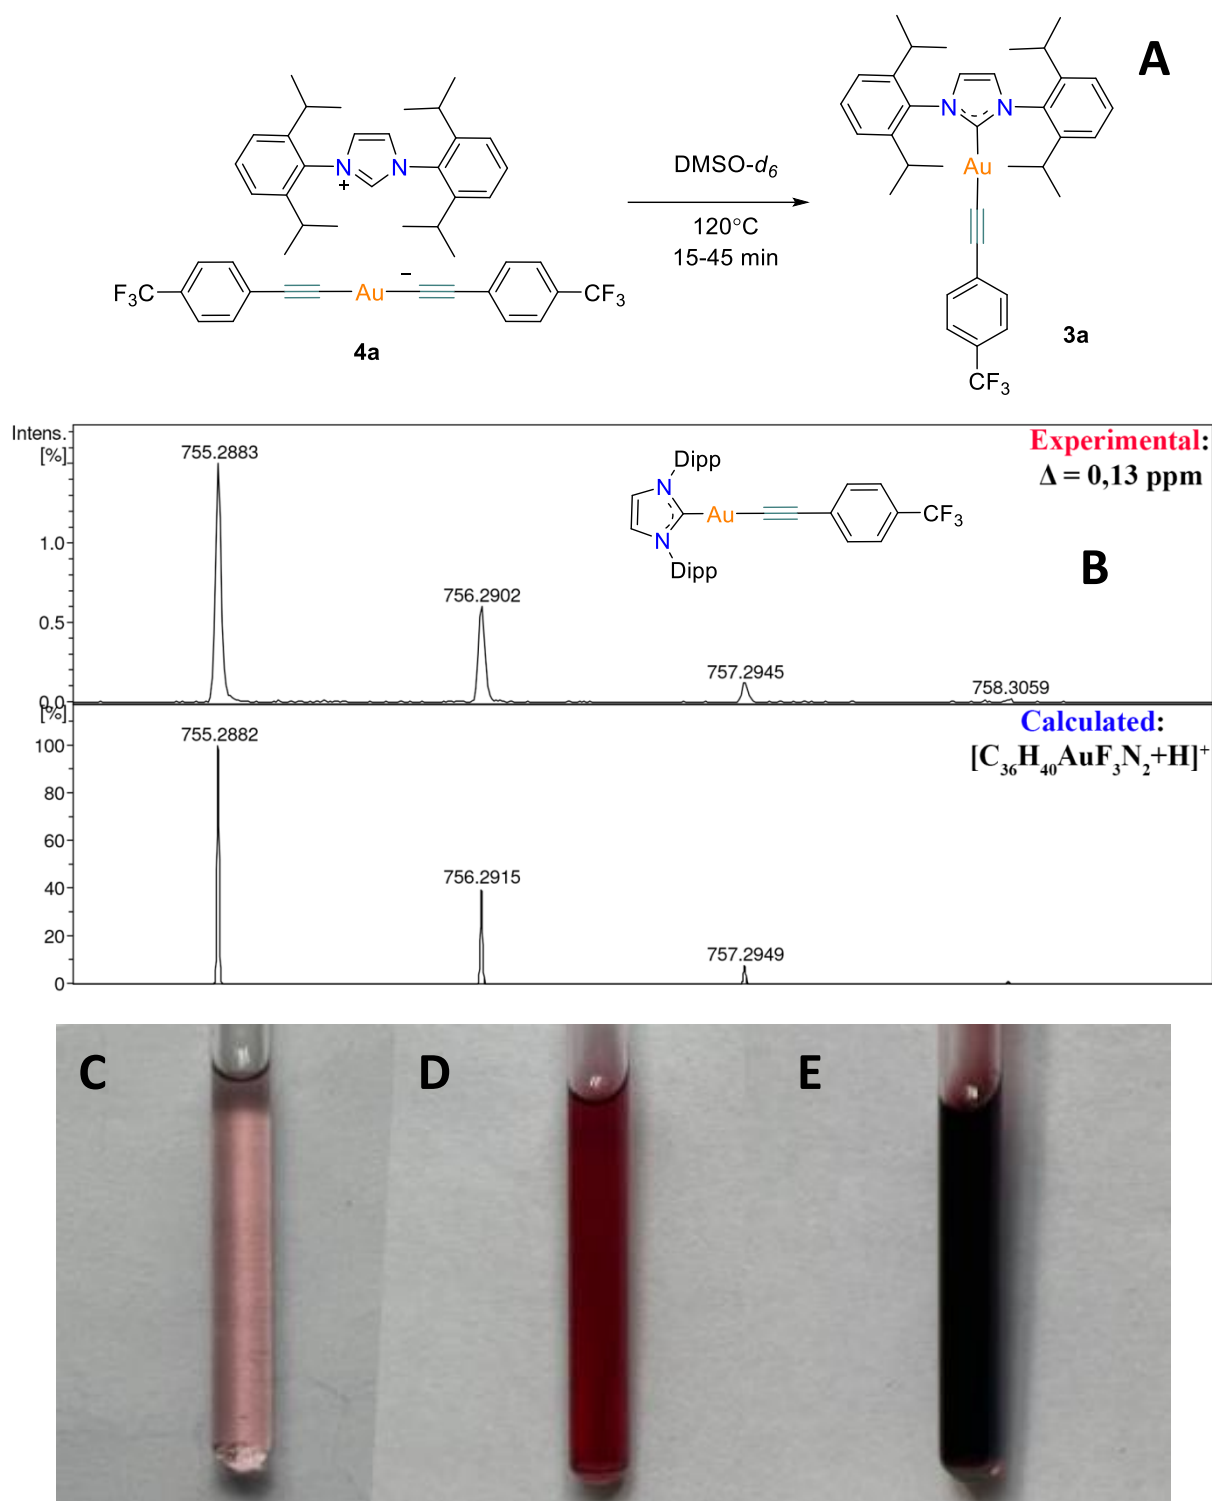

**Figure S42.** A) Transformation of homoleptic gold(I) complex **4a** to heteroleptic gold(I) complex **3a** in DMSO- $d_6$  at 120 °C; B) Experimental and theoretical ESI-(+)HRMS spectrum of the reaction mixture of formation of heteroleptic gold(I) complex **3a** from homoleptic gold(I) complex **4a** in DMSO- $d_6$  at 120 °C, expanded to the  $[\text{NHC-Au-alkynyl}+\text{H}]^+$  region. Sample diluted in  $\text{CH}_3\text{CN}$ ; Pictures of heating of complex **4a** in DMSO- $d_6$ : C) 15 min at 80 °C; D) 30 min at 100 °C; E) 15 min at 120 °C with 1 eq.  $\text{PhI}(\text{OAc})_2$ .

**Table S3.** The formation of bis-NHC Au(I) complex from Au NPs study.

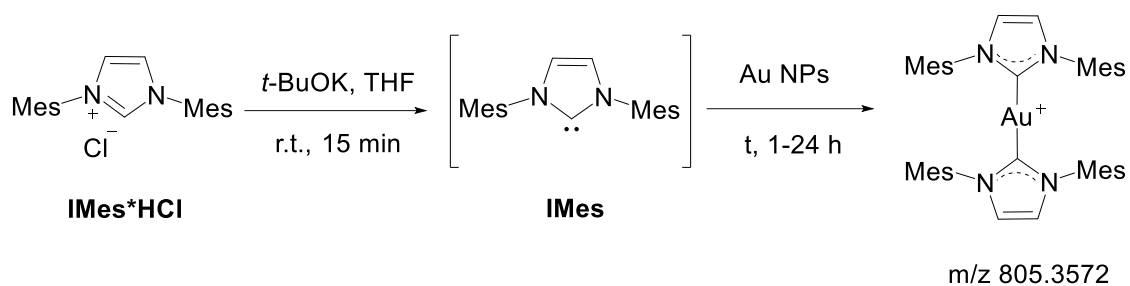

1. t = r.t.
2. t = 60 °C
3. t = 90 °C
4. t = 120 °C

| Entry | Temperature | Time | <i>m/z</i> 805.3539<br>ESI-HRMS |
|-------|-------------|------|---------------------------------|
| 1     | r.t.        | 0 h  | trace                           |
| 2     | r.t.        | 24 h | detected                        |
| 3     | 60 °C       | 24 h | detected                        |
| 4     | 90 °C       | 24 h | detected                        |
| 5     | 120 °C      | 24 h | detected                        |

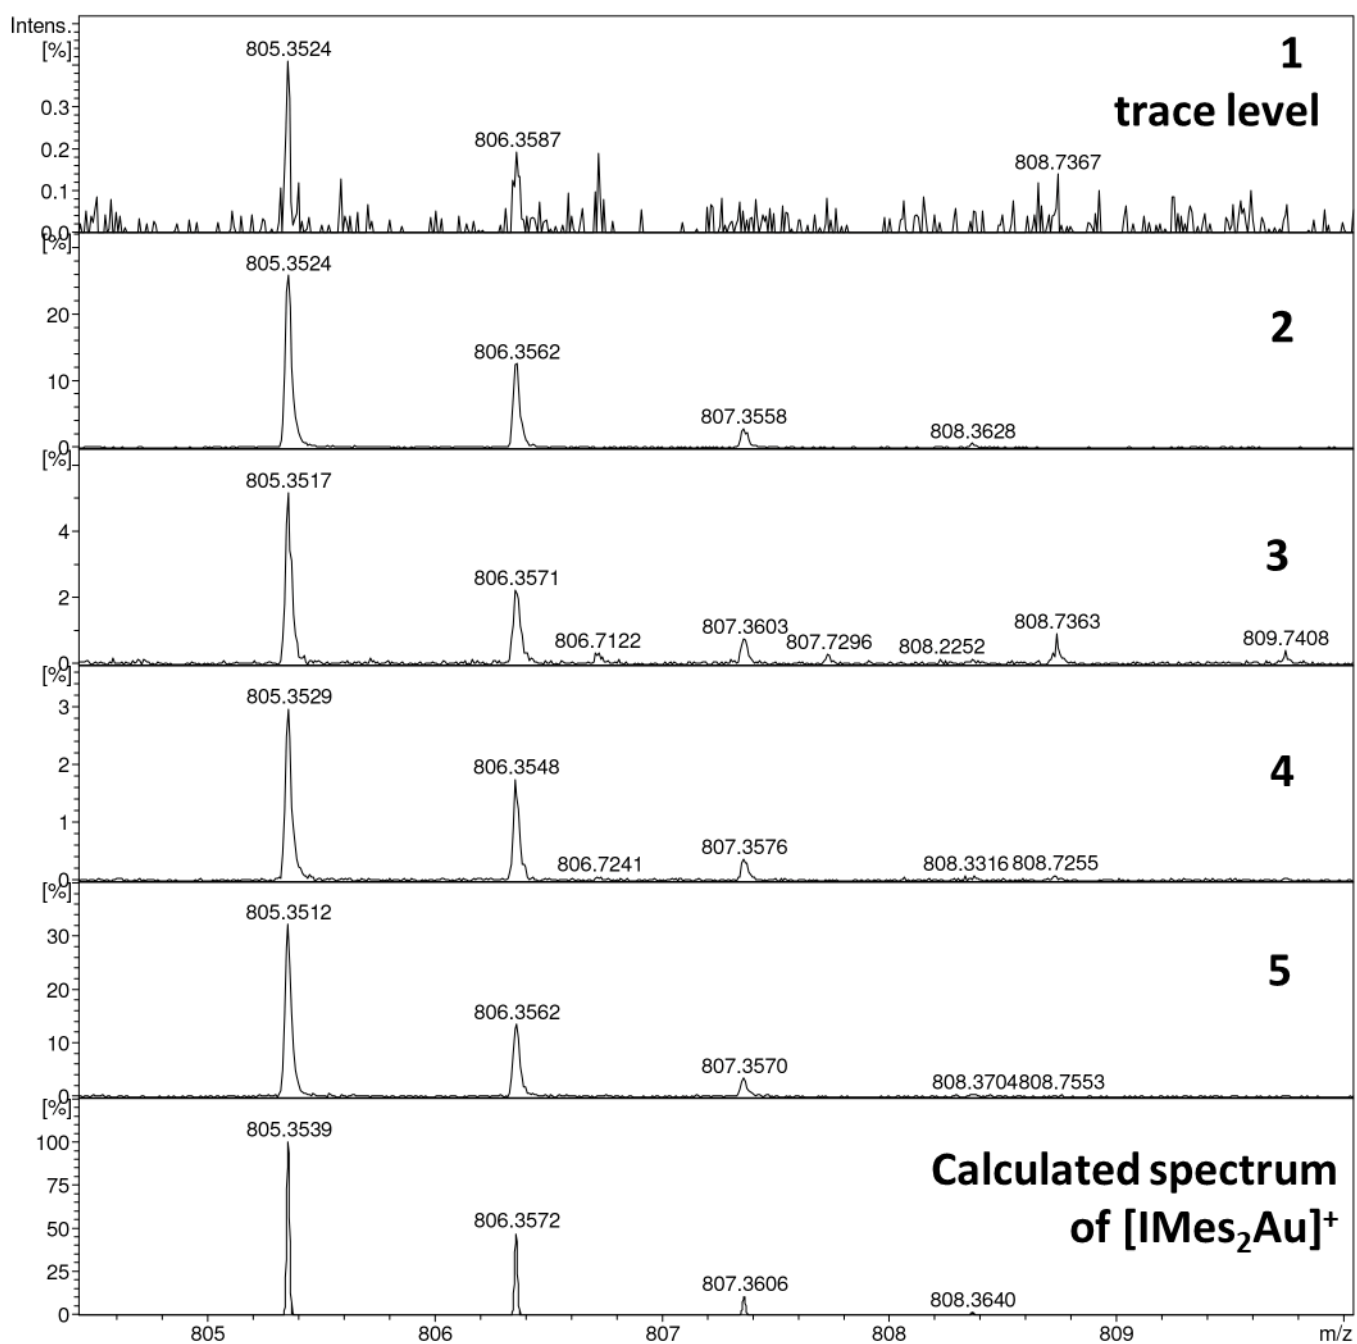

**Figure S43.** Experimental ESI-(+)HRMS spectrum of the reaction mixture of formation of complex  $[\text{IMes}_2\text{Au}]^+$  from gold nanoparticles: the 805  $m/z$  region with theoretical ESI-HRMS spectrum of investigated  $[\text{IMes}_2\text{Au}]^+$  ion.



**Table S4.** ESI-HRMS fragments of the most common NHC-AuCl complexes.

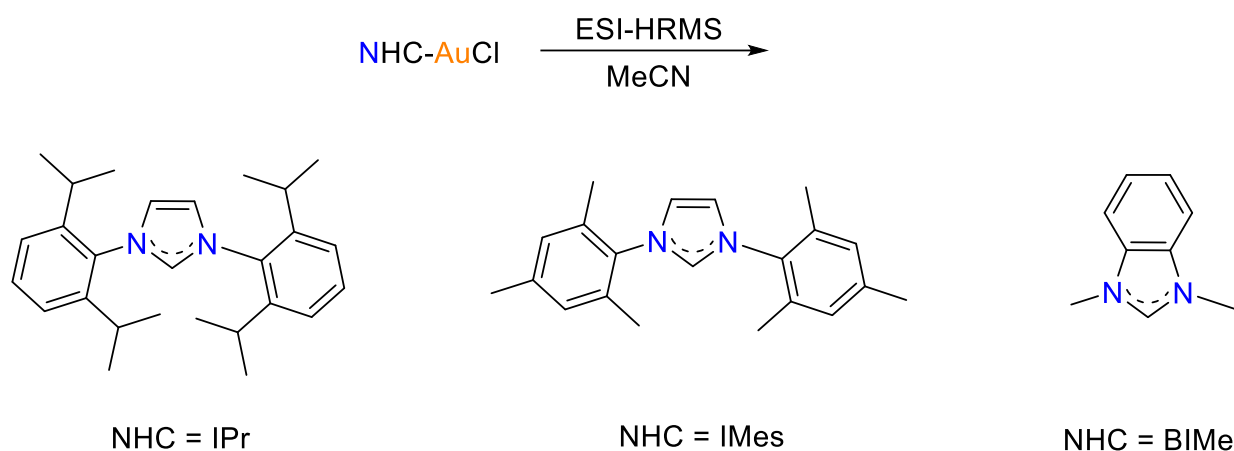

| NHC         | [NHC-H] <sup>+</sup>              | [M-H] <sup>+</sup>                    | [M-H-MeCN] <sup>+</sup>                                        | [NHC-Au] <sup>+</sup>                                  | [NHC <sub>2</sub> Au] <sup>+</sup>                                  |
|-------------|-----------------------------------|---------------------------------------|----------------------------------------------------------------|--------------------------------------------------------|---------------------------------------------------------------------|
| <b>IPr</b>  | 389.2964<br>[IPr-H] <sup>+</sup>  | 621.2280<br>[IPrAuCl-H] <sup>+</sup>  | 626.2810<br>[IPrAuCl-H-MeCN] <sup>+</sup><br>was not detected  | 585.2514<br>[IPr-Au] <sup>+</sup><br>was not detected  | 973,5423<br>[IPr <sub>2</sub> Au] <sup>+</sup><br>was not detected  |
|             | 305,2018<br>[IMes-H] <sup>+</sup> | 536,1294<br>[IMesAuCl-H] <sup>+</sup> | 543.1949<br>[IMesAuCl-H-MeCN] <sup>+</sup><br>was not detected | 501,1605<br>[IMes-Au] <sup>+</sup><br>was not detected | 805,3544<br>[IMes <sub>2</sub> Au] <sup>+</sup><br>was not detected |
| <b>BIme</b> | 147.0922<br>[BIme-H] <sup>+</sup> | 379,0276<br>[BImeAuCl-H] <sup>+</sup> | 385.0853<br>[BImeAuCl-H-MeCN] <sup>+</sup><br>was not detected | 344,0588<br>[BIme-Au] <sup>+</sup><br>was not detected | 489,1353<br>[BIme <sub>2</sub> Au] <sup>+</sup><br>was not detected |

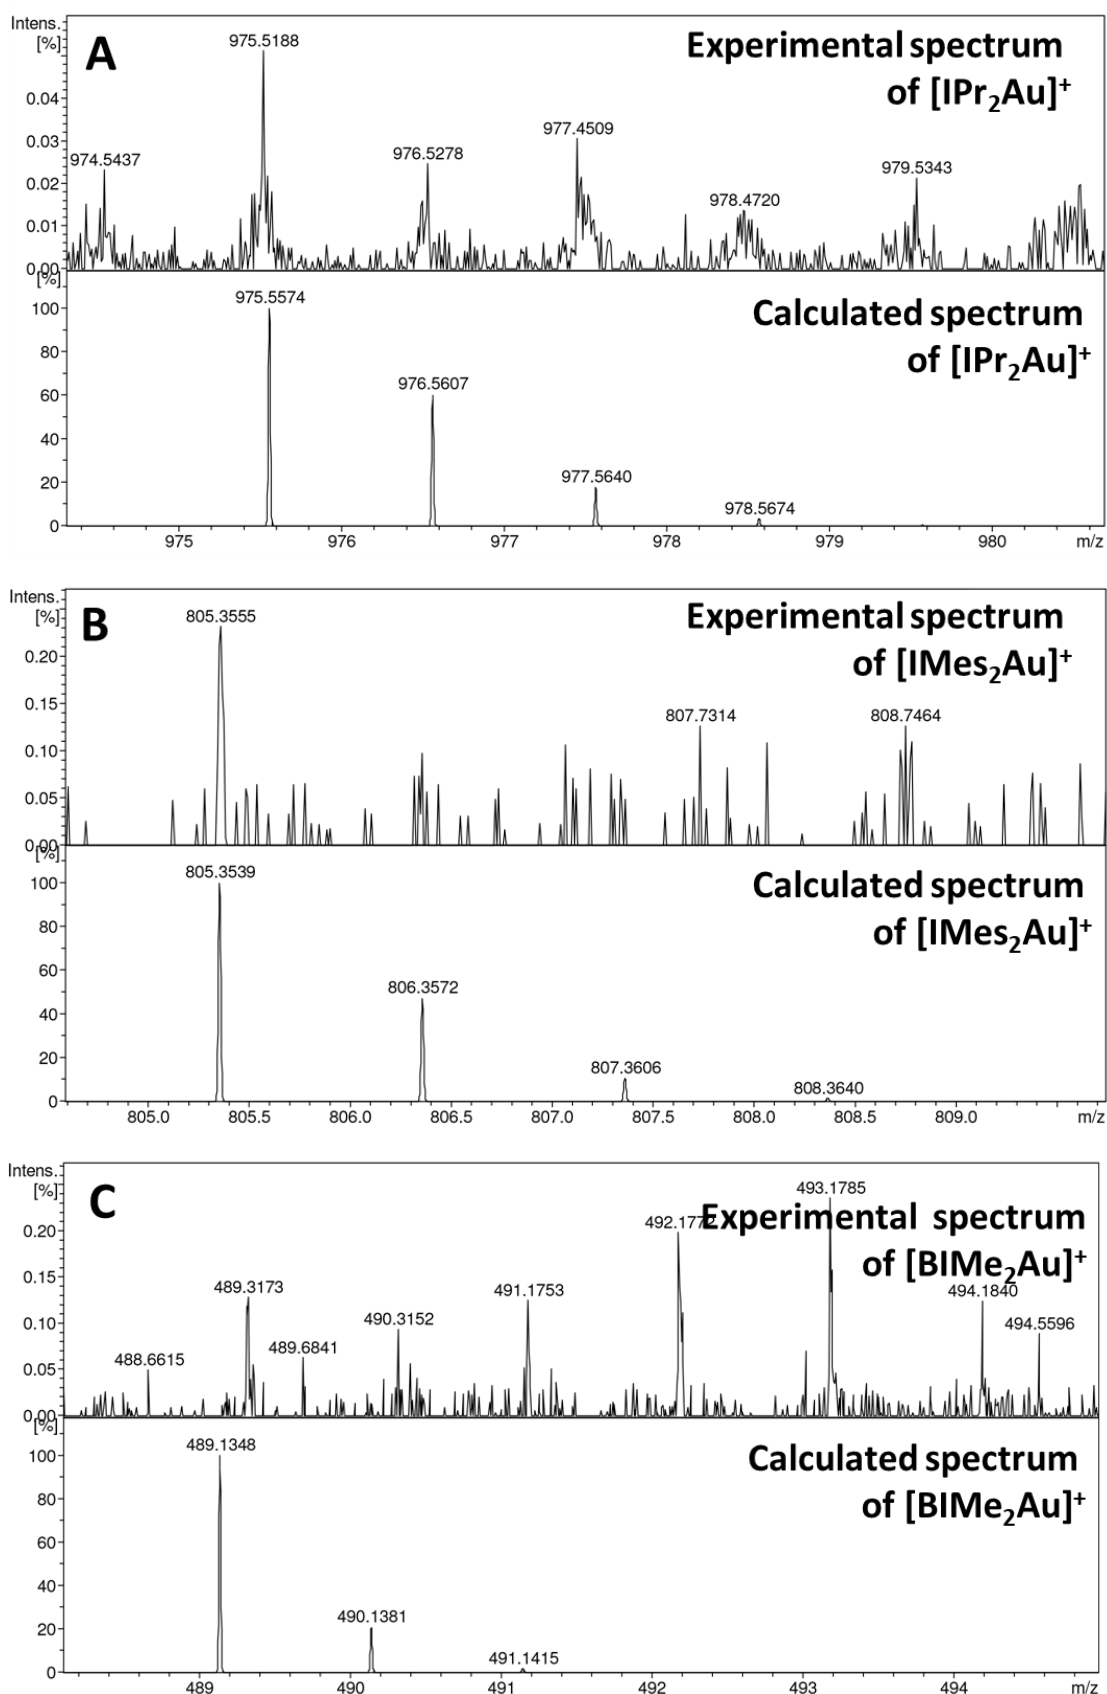

**Figure S44.** Experimental ESI-(+)-HRMS spectrum of the  $[\text{NHC}_2\text{Au}]^+$  region obtained when the registration of NHC-AuCl were carried out: A) NHC = IPr, B) NHC = IMes, C) NHC = BIME.

## 9. $^1\text{H}$ NMR study of the chemical properties of homoleptic gold complex **3**

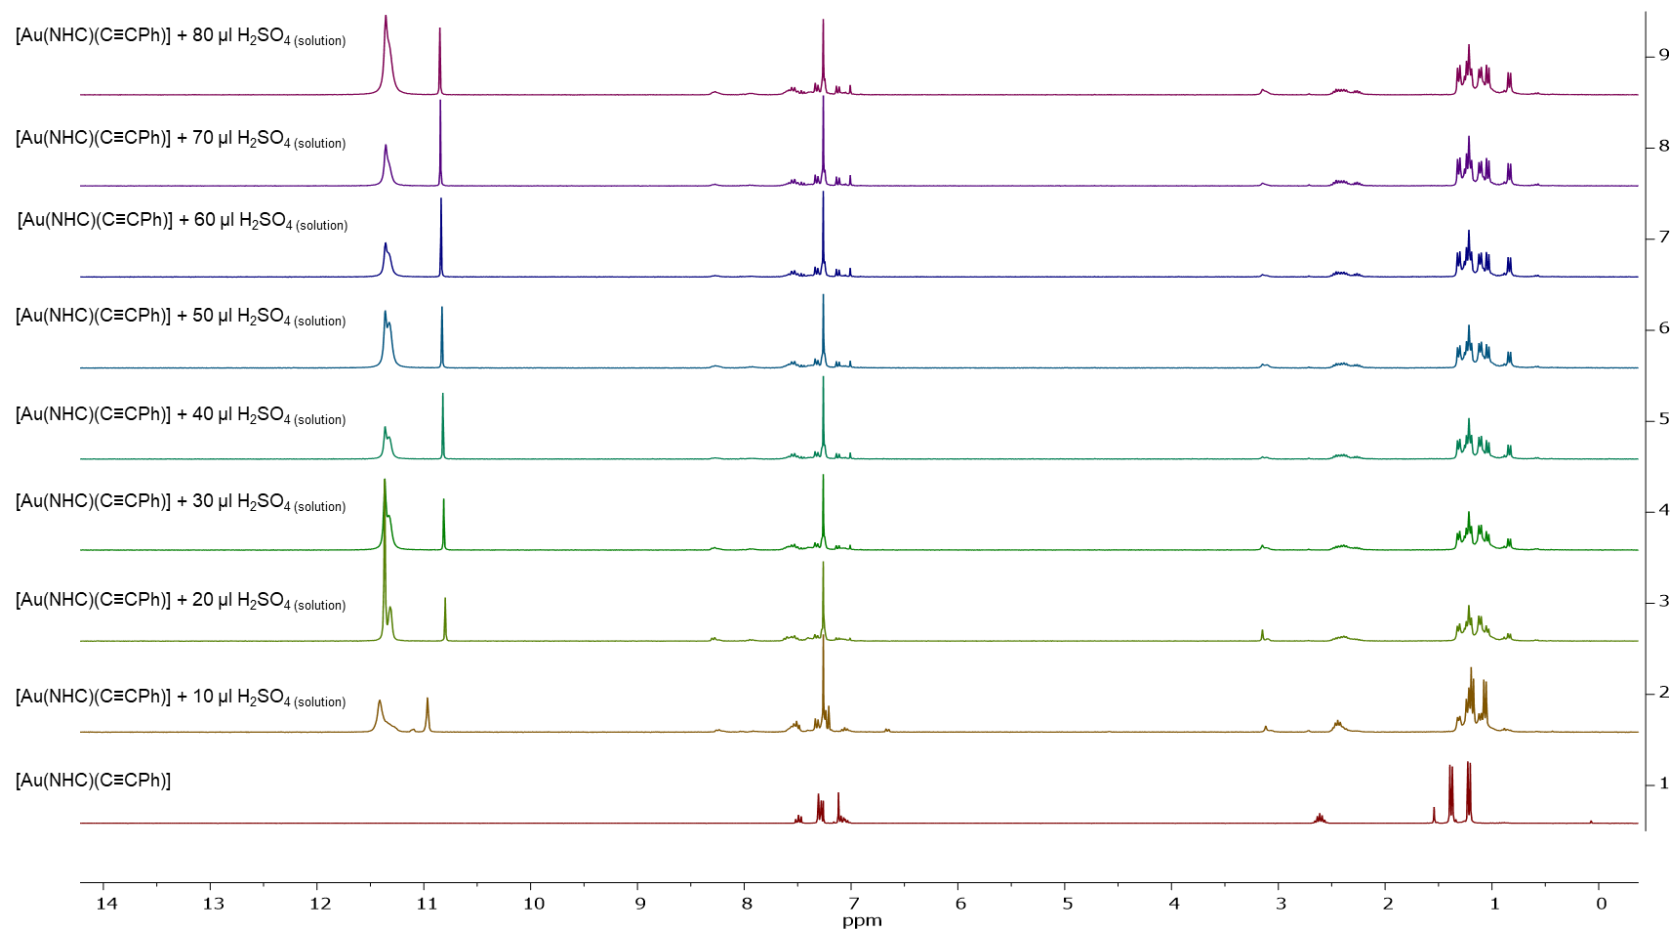

**Figure S45.**  $^1\text{H}$  NMR spectra of the reaction mixture after the portion addition (10  $\mu\text{L}$  at a time) of 1 eq. of  $\text{H}_2\text{SO}_4$  in 100  $\mu\text{L}$   $\text{CDCl}_3$  to the complex **3f** ( $\text{CDCl}_3$ , 300 MHz).

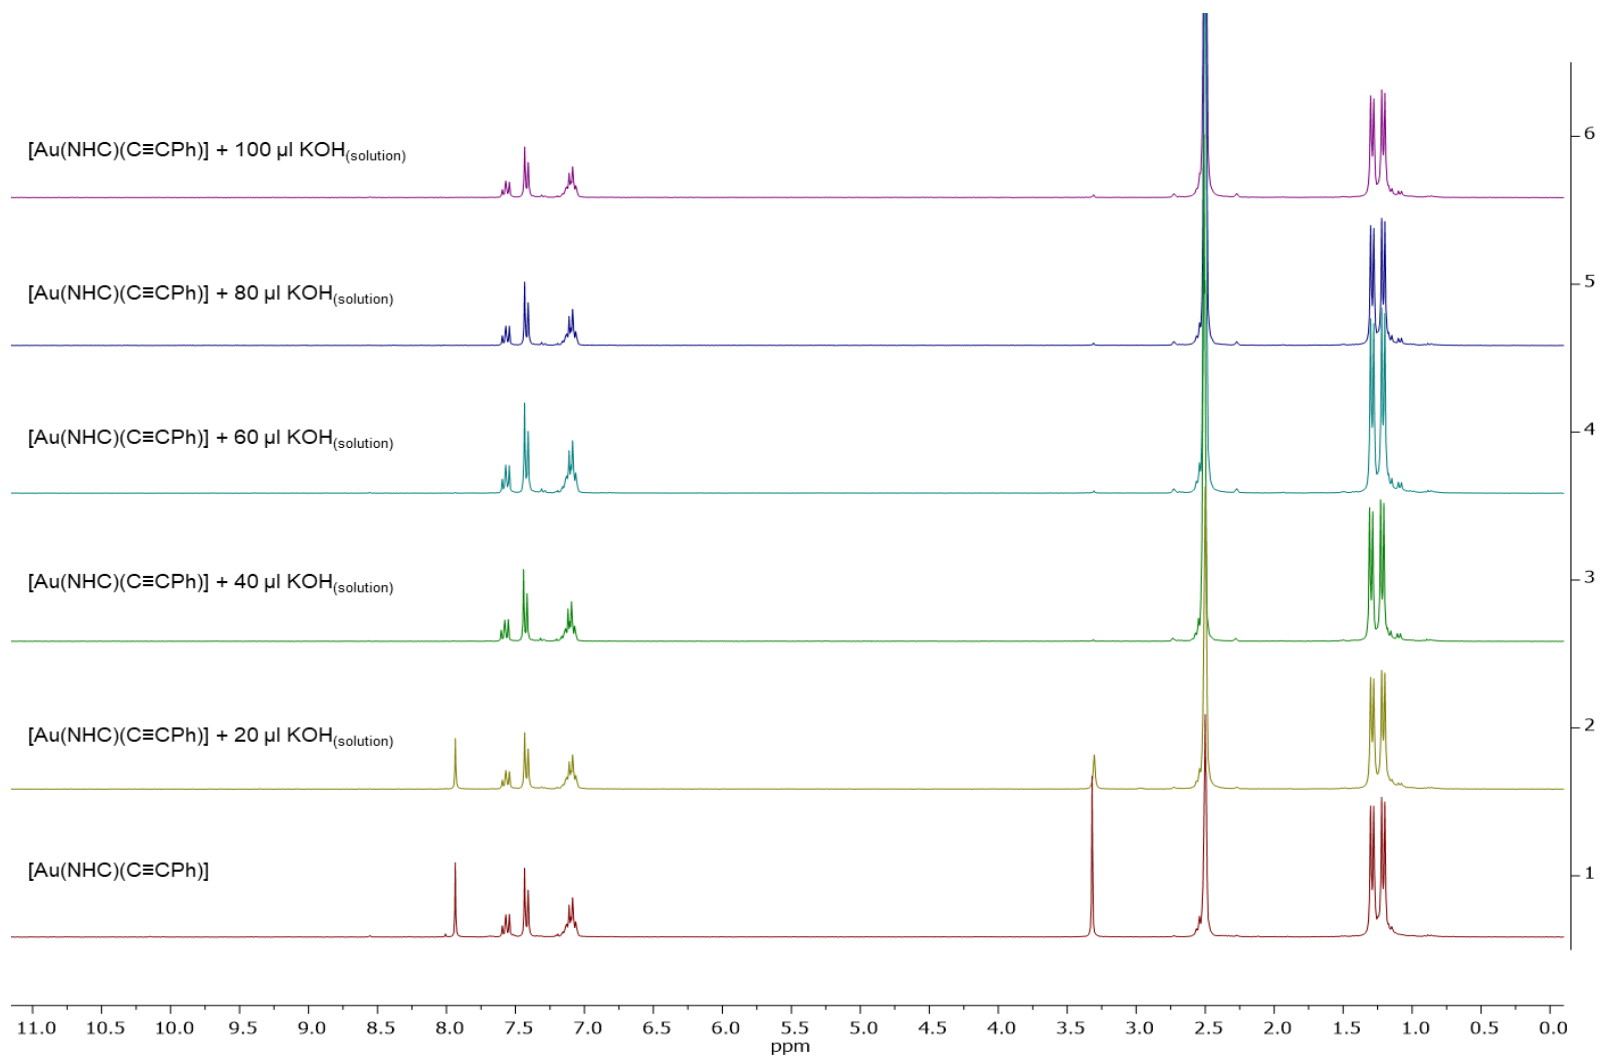

**Figure S46.** <sup>1</sup>H NMR spectra of the reaction mixture after the portion addition (20 μL at a time) of 1 eq. of KOH in 100 μL DMSO-*d*<sub>6</sub> to the complex **3f** (DMSO-*d*<sub>6</sub>, 300 MHz).

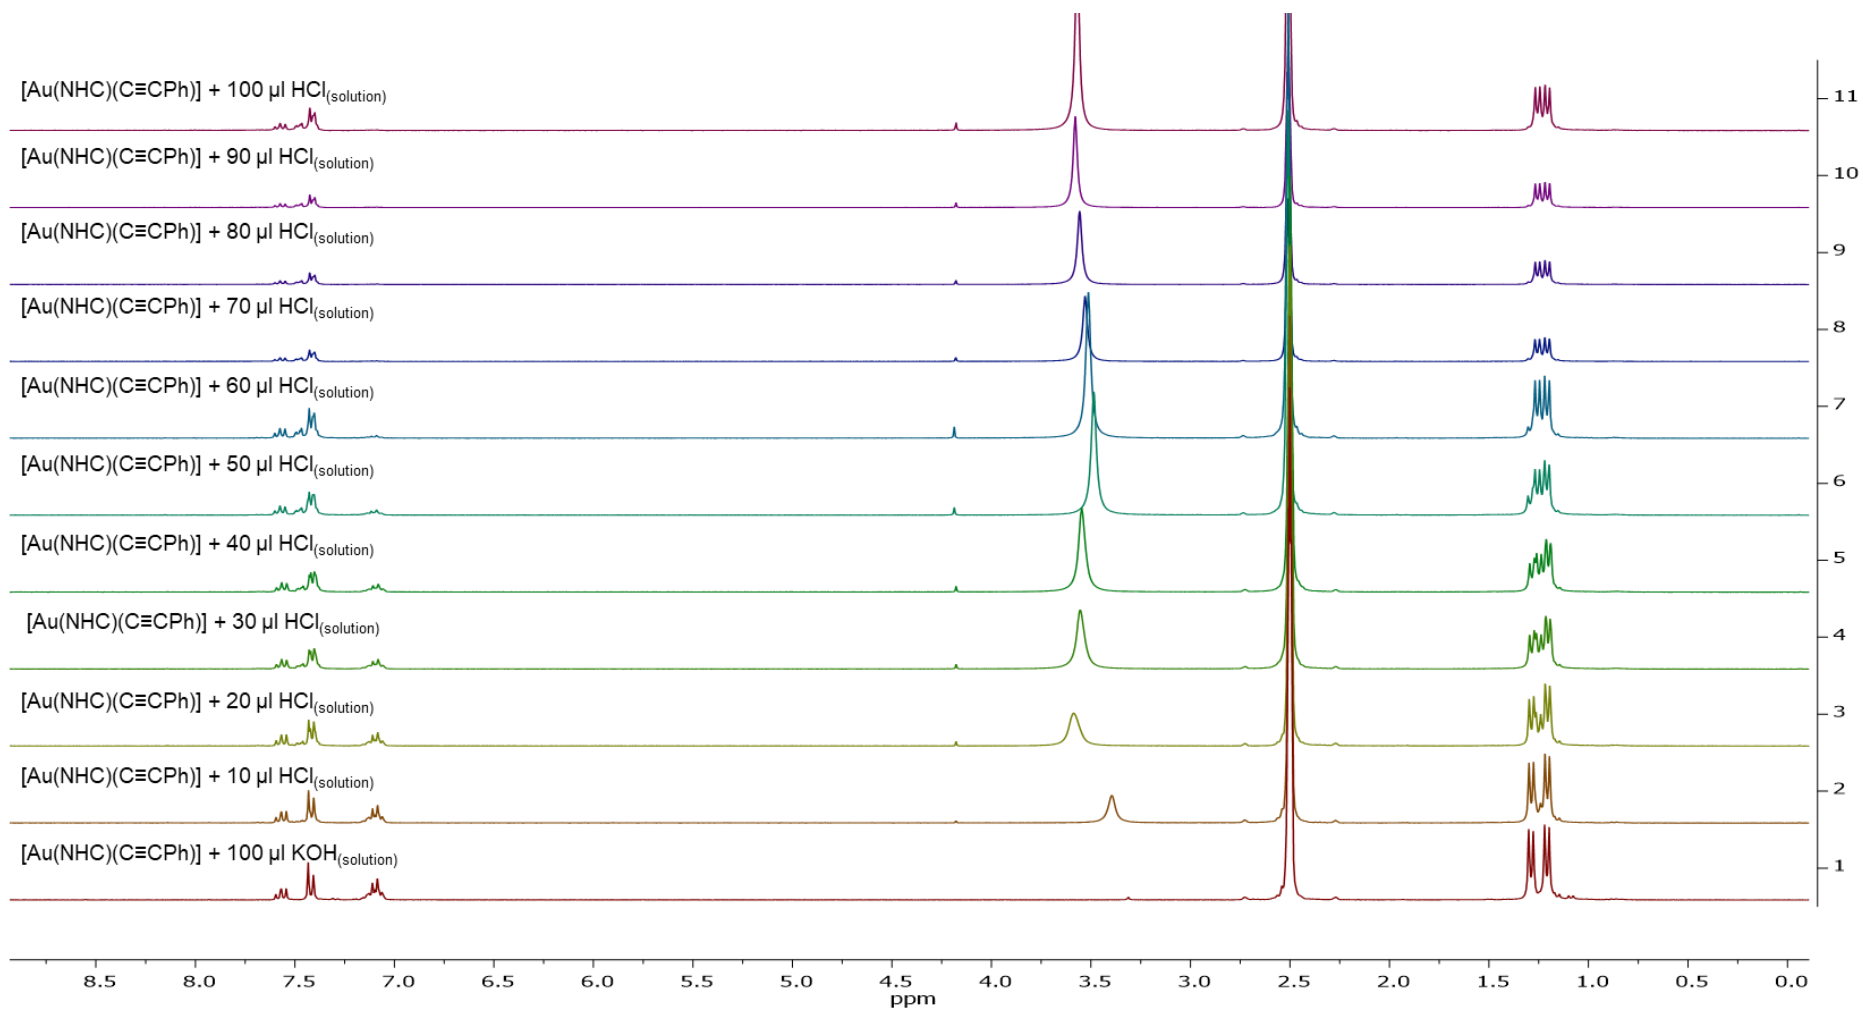

**Figure S47.** <sup>1</sup>H NMR spectra of the reaction mixture after the portion addition (10 μL at a time) of 1 eq. of HCl<sub>aq</sub> to the mixture of 1 eq. KOH and complex **3f** in DMSO-*d*<sub>6</sub> (DMSO-*d*<sub>6</sub>, 300 MHz).

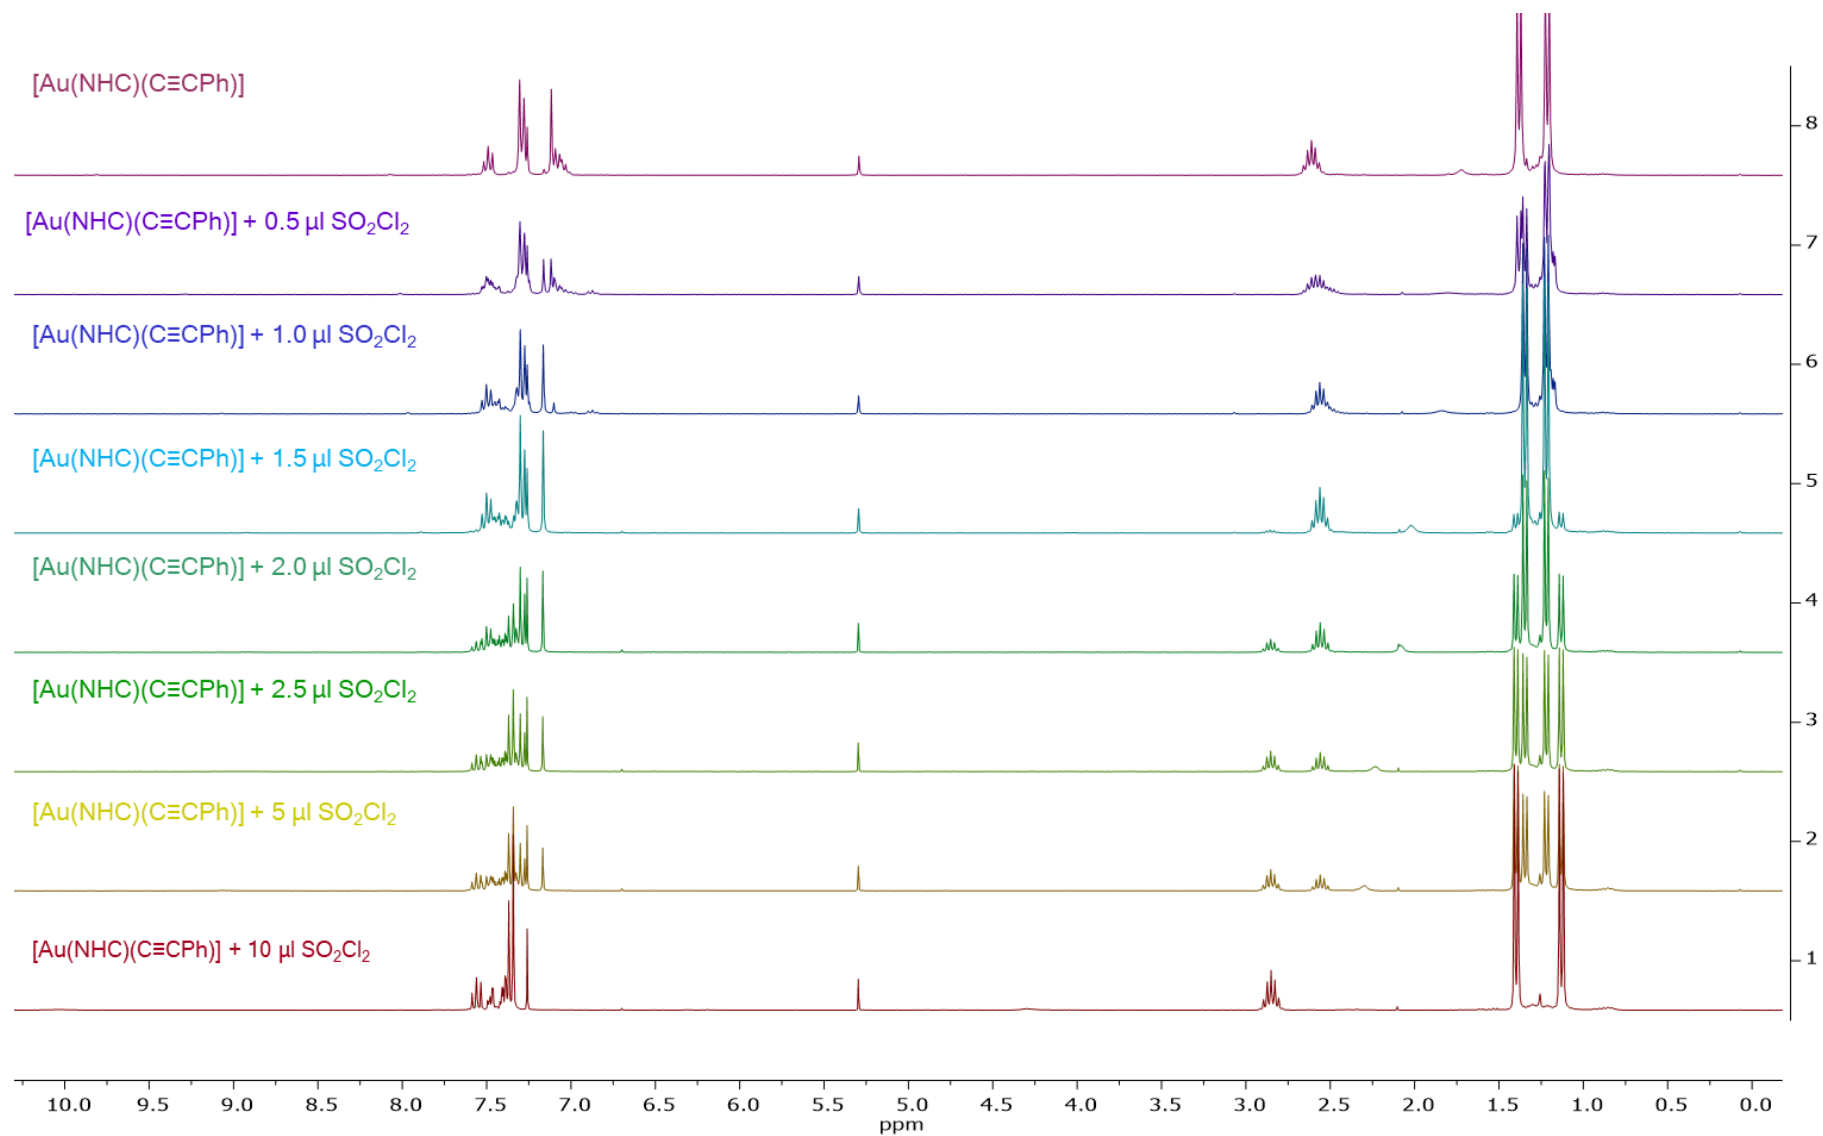

**Figure S48.** <sup>1</sup>H NMR spectra of the reaction mixture after the portion addition of SO<sub>2</sub>Cl<sub>2</sub> to the complex **3f** (CDCl<sub>3</sub>, 300 MHz).

## 10. TGA/DSC analysis of gold (I) complexes

Instrument: SDT Q600 V8.1 Build 99

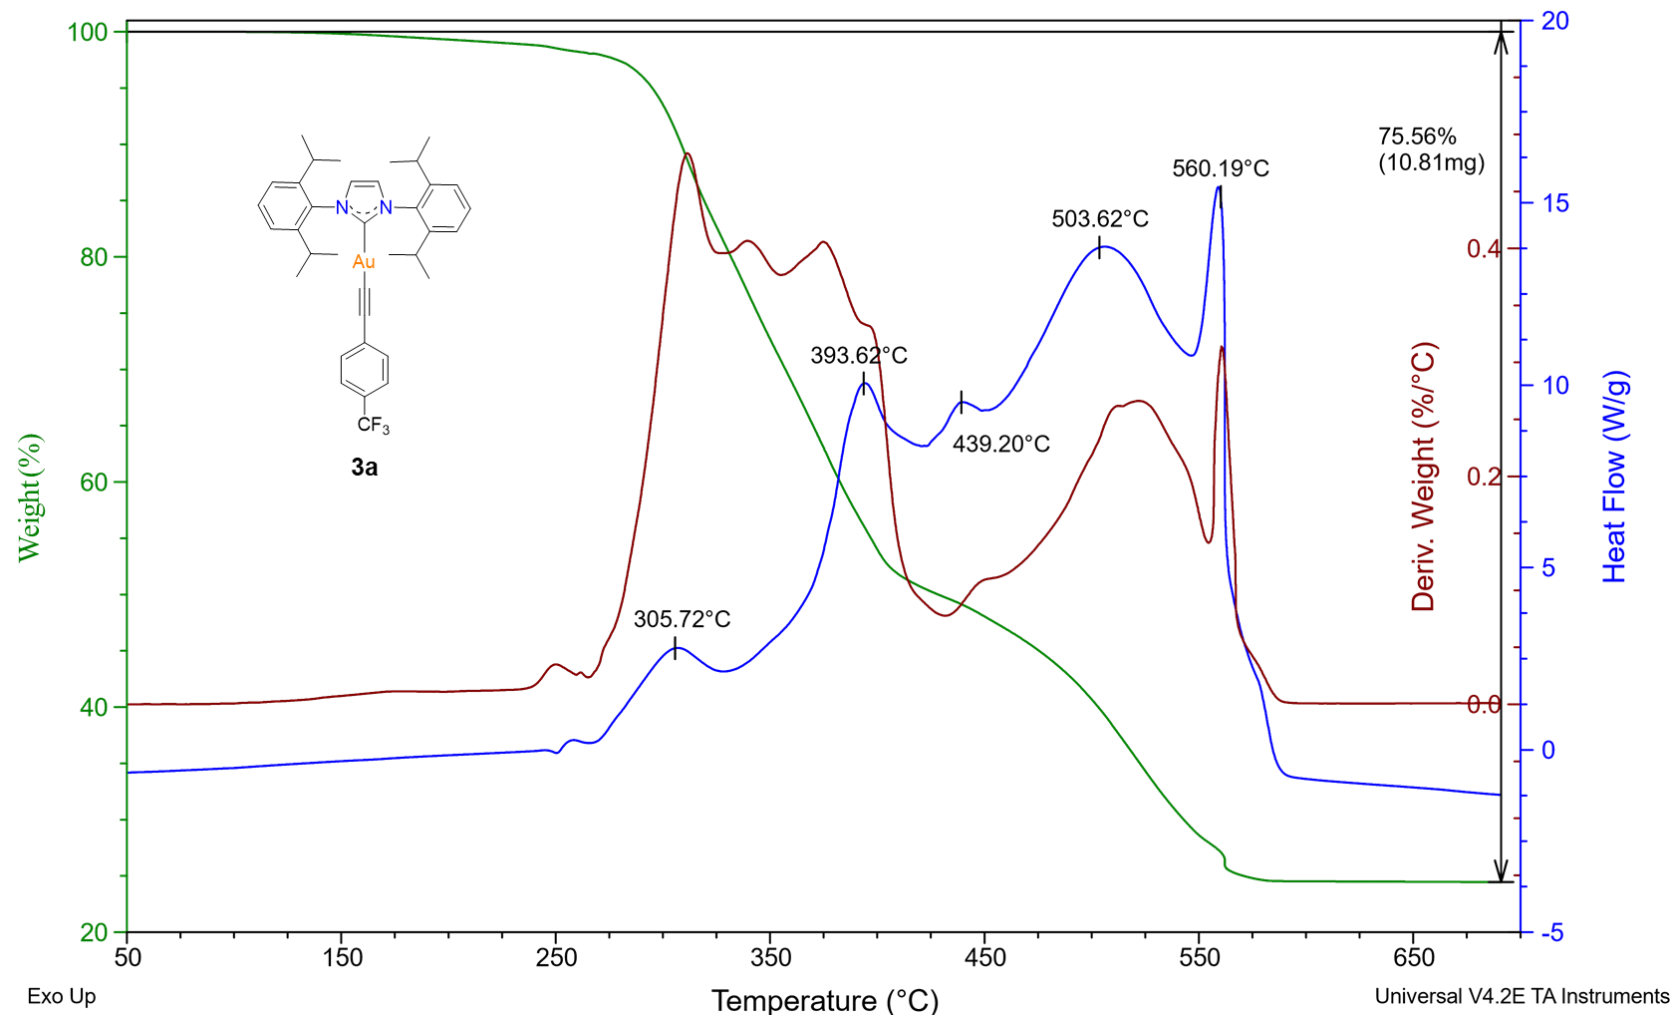

Figure S49. TGA/DSC analysis for complex **3a**.

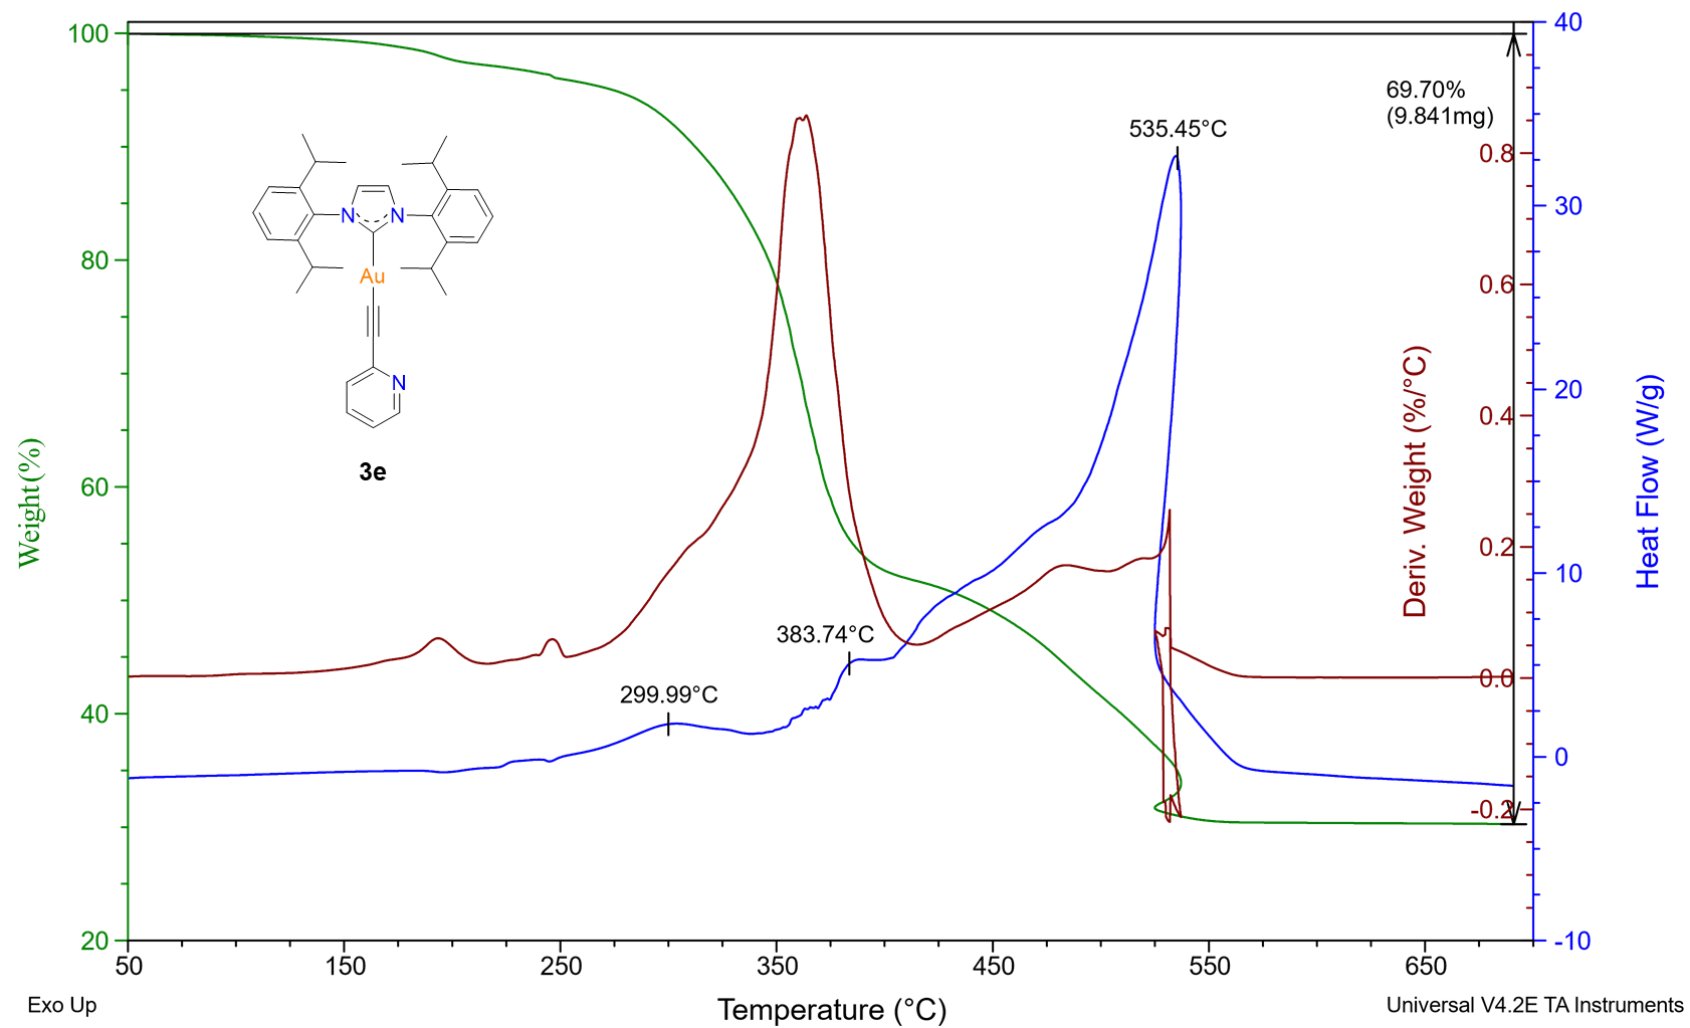

Figure S50. TGA/DSC analysis for complex **3e**.



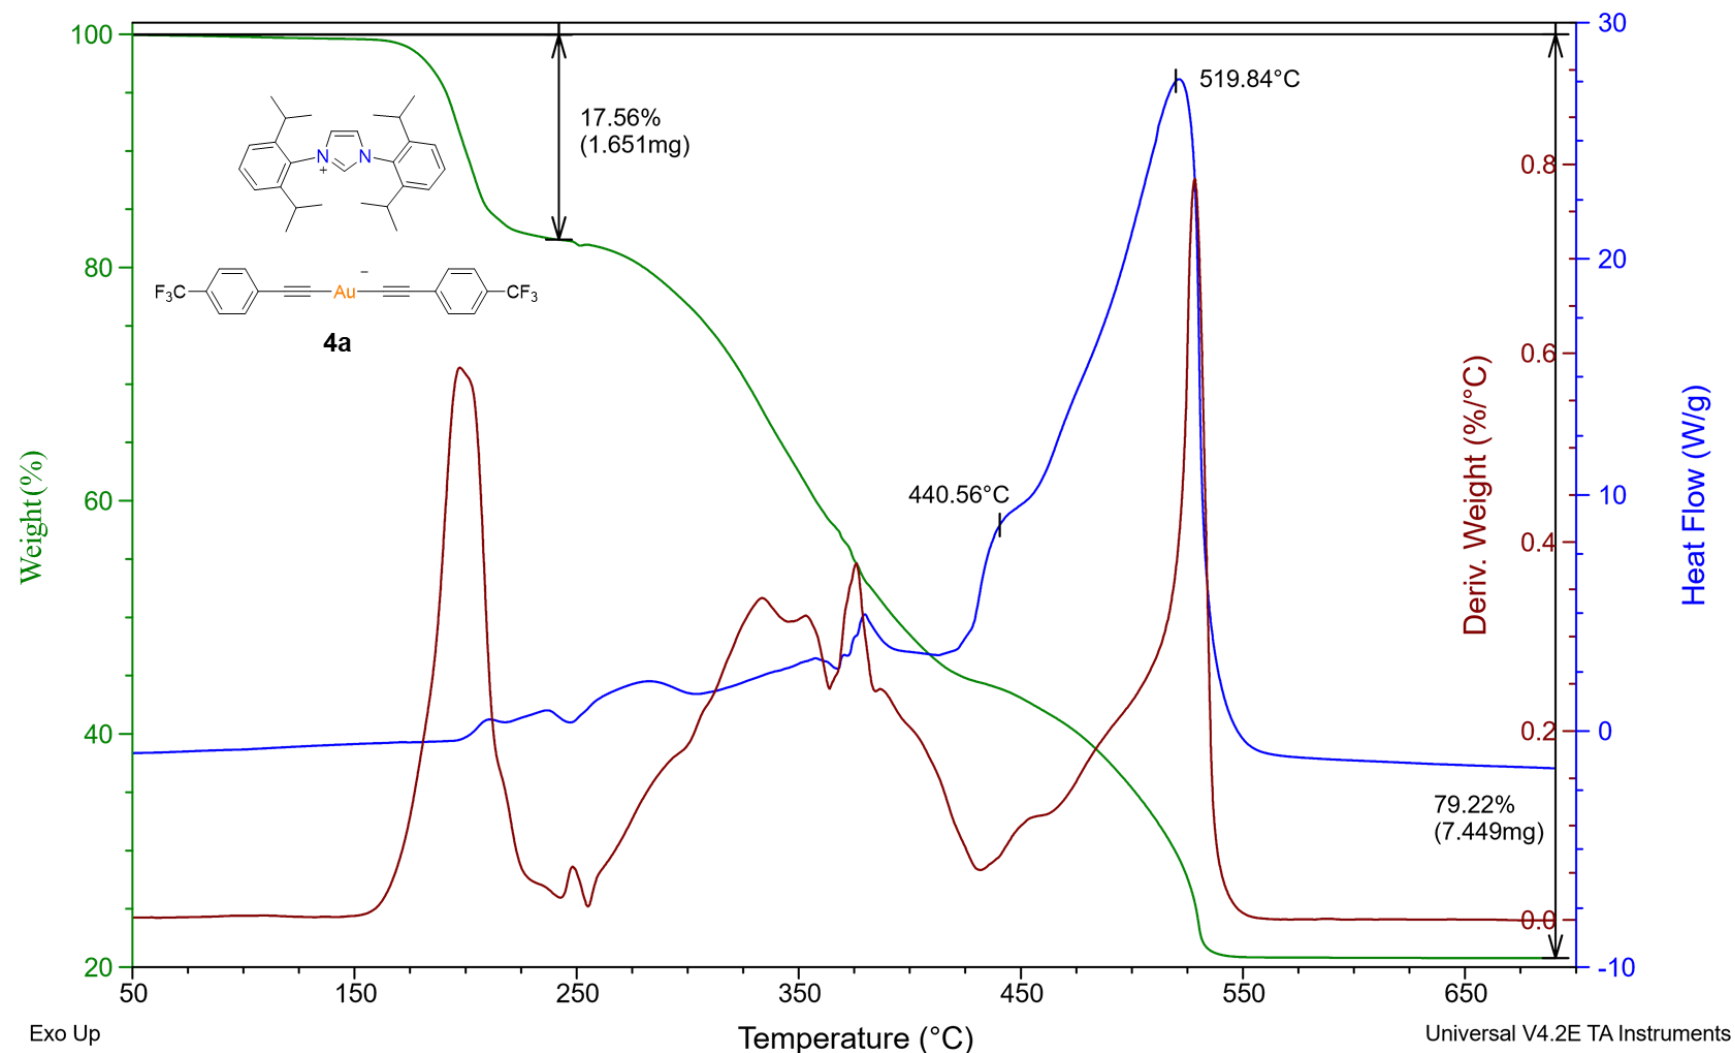Figure S51. TGA/DSC analysis for complex **4a**.

## 11.X-ray diffraction study of structures of gold(I) complexes

Regardless of the relatively large number of crystallographically studied NHC-Au(I) complexes, complexes of type IPr-Au-C≡C-R (R= Alkyl, Aryl) are still poorly and irregularly studied by single-crystal X-ray diffraction analysis. According to the Cambridge Structural Database<sup>1</sup>, crystal structures of IPr-Au-C≡C-R are limited to 4 (R=Alkyl) and 13 (R=Aryl) published models, including that of **3f**•CHCl<sub>3</sub>.<sup>2</sup> Herein, we report the structures of **3a**, **3b**, **3c**, **3e** and **4a** (Fig. S52, see also Section 12 for details). The structure of closely related IPr-Au-C≡C-CH<sub>3</sub><sup>3</sup> will also be used for comparison. The crystal structure of **3h** (see below) has been already presented in the CSD.

Complex **3a** forms two different triclinic polymorph modifications. The first modification, **3a-I**, exhibits one unique (*Z'*=1) but entirely disordered molecule of **3a**, whereas the second modification, **3a-II**, has three crystallographically unique molecules (*Z'*=3). Complexes **3b** and **3c** crystallize as dichloromethane solvates **3b**•CH<sub>2</sub>Cl<sub>2</sub> (*Z'*=1) and **3c**•0.92(CH<sub>2</sub>Cl<sub>2</sub>) (*Z'*=2). Complex **3e** crystallizes in the chiral P2<sub>1</sub> space group (*Z'*=2). Both crystallographically non-equivalent molecules exhibit rather large thermal motions resulting in poor accuracy in determination of bond lengths. It seems that **4a** is the sole crystallographically studied example containing both a complex anion [Au(-C≡C-R)<sub>2</sub>]<sup>-</sup> and a cation of a protonated NHC ligand.

The Au atom in complexes **3a**, **3b**, **3c**, **3e** and **4a** is in a linear environment, as expected for Au(I); the C<sub>NHC</sub>-Au-C≡C angle varies from 175.1(2)° to 178.9(6)°. The C-C and C-N bond distances (within the given ESDs) in the NHC ligand are, on average, similar in complexes IPr-Au-C≡C-Aryl (**3a**, **3b**, **3c**, **3e** and **3f**) but slightly differ from those in IPr-Au-C≡C-CH<sub>3</sub>.<sup>3</sup> Analysis of the Au-C<sub>NHC</sub>, Au-C≡C and C≡C distances (Table S5) indicates similar electron effects induced by C≡C-Aryl ligands. The C≡C-Aryl ligands exhibit a somewhat reduced σ-donor ability compared to that of C≡C-Me, which makes the IPr NHC ligand a somewhat stronger σ-donor, reflecting this in shorter Au-C<sub>NHC</sub> bond distances (Table S5). Both longer C≡C and shorter Au-C≡C distances indicate a stronger π-acceptor ability of the C≡C-Aryl ligands.

Both effects likely lead to a higher thermodynamic stability of complexes IPr-Au-C≡C-Aryl compared to that of IPr-Au-C≡C-Alkyl, using IPr-Au-C≡C-Me as an example. Among the subtle differences for complexes **3a**, **3b**, **3c** and **3f**, it might be noted that the smallest σ-donor ability might be attributed to **3a**, bearing the C≡C-C<sub>6</sub>H<sub>4</sub>-4-CF<sub>3</sub> ligand, whereas the smallest π-acceptor ability is observed for **3e** and **3b** (shortest C≡C bond lengths). Structure **3h** (see the CSD<sup>1</sup>) exhibits similar electronic and geometrical properties to those of IPr-Au-C≡C-Aryl (**3a**, **3b**, **3c** and **3f**).

Interestingly, the  $\pi$ -acceptor ability of the  $\text{C}\equiv\text{C}-\text{C}_6\text{H}_4-4-\text{CF}_3$  ligand does not seem to change in the complex anion of Au(I) in **4a**.

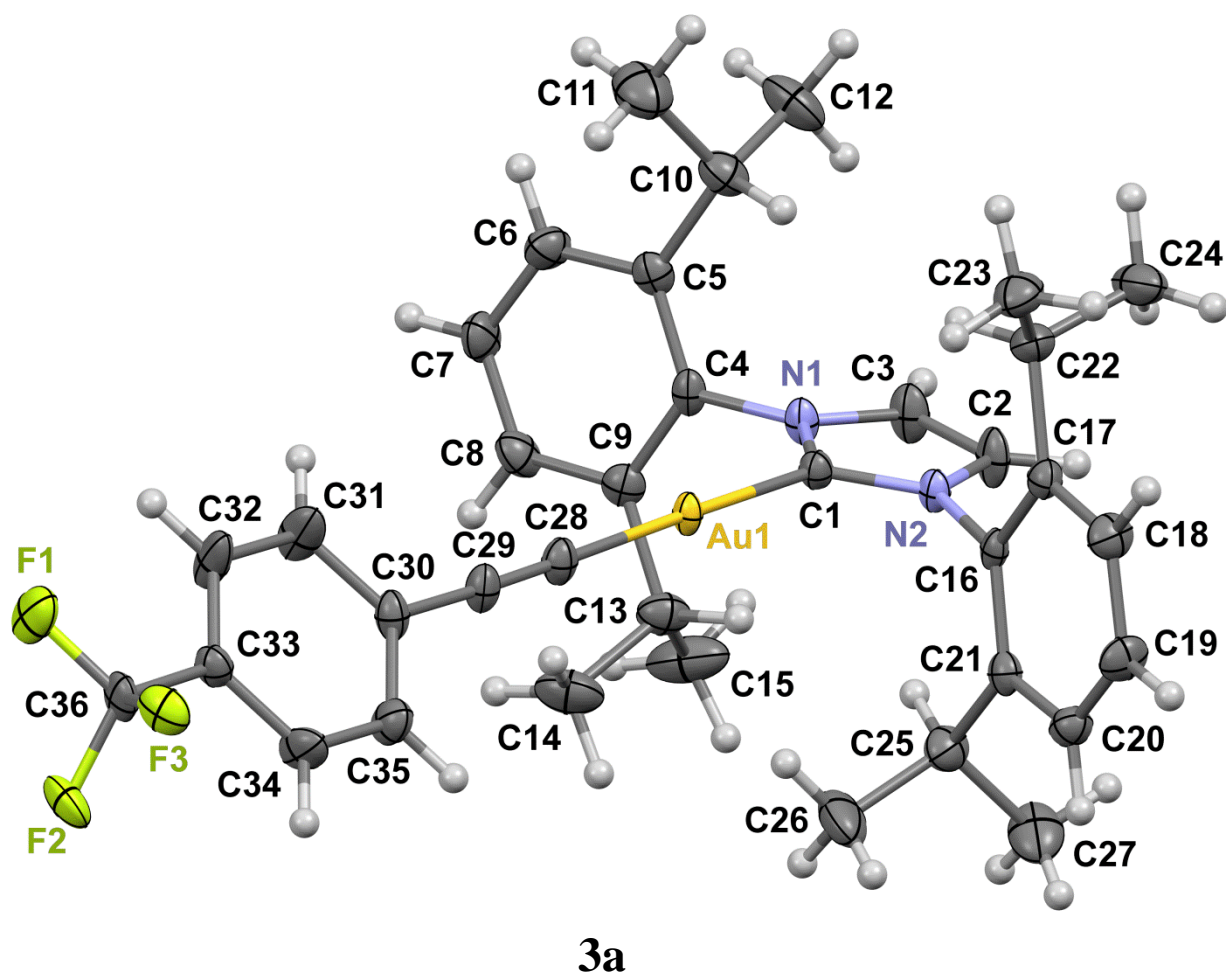

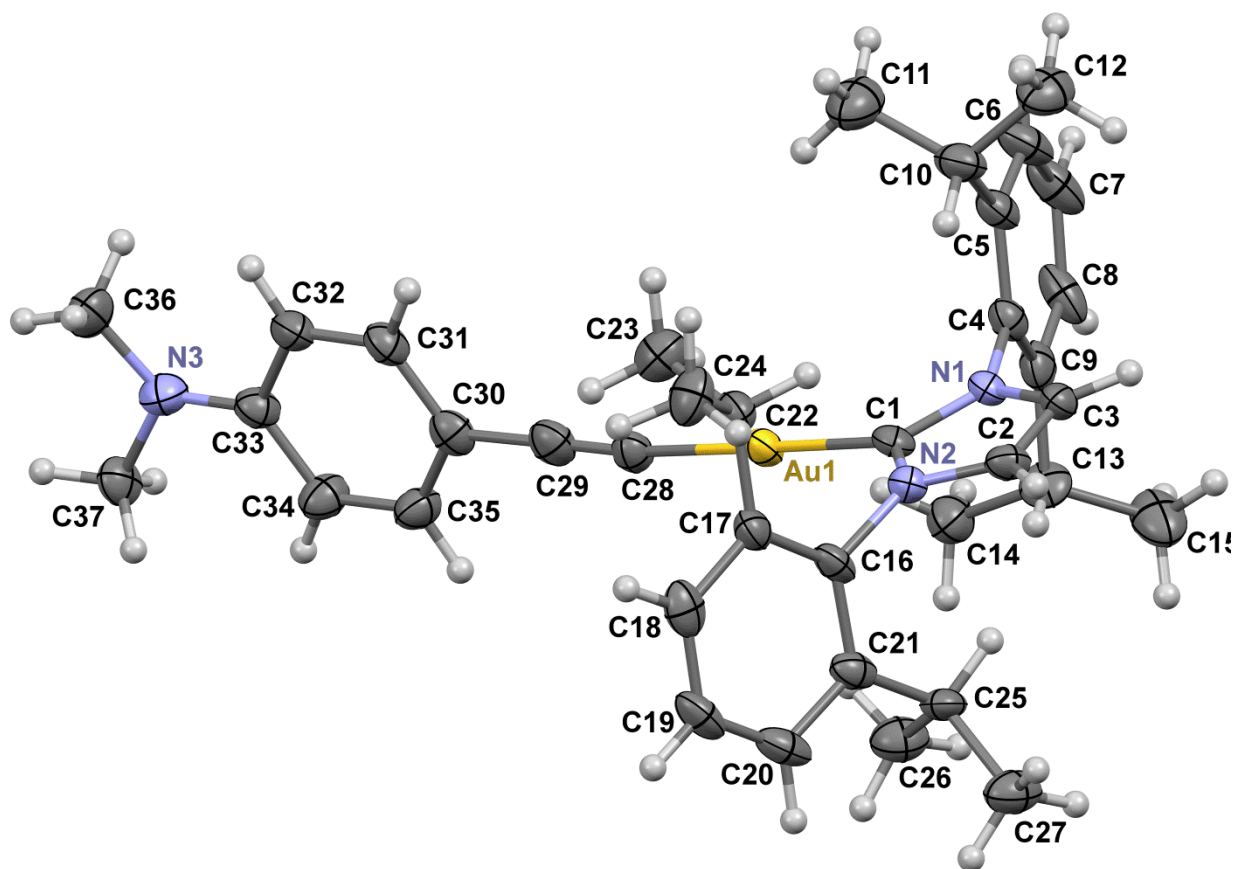

3b

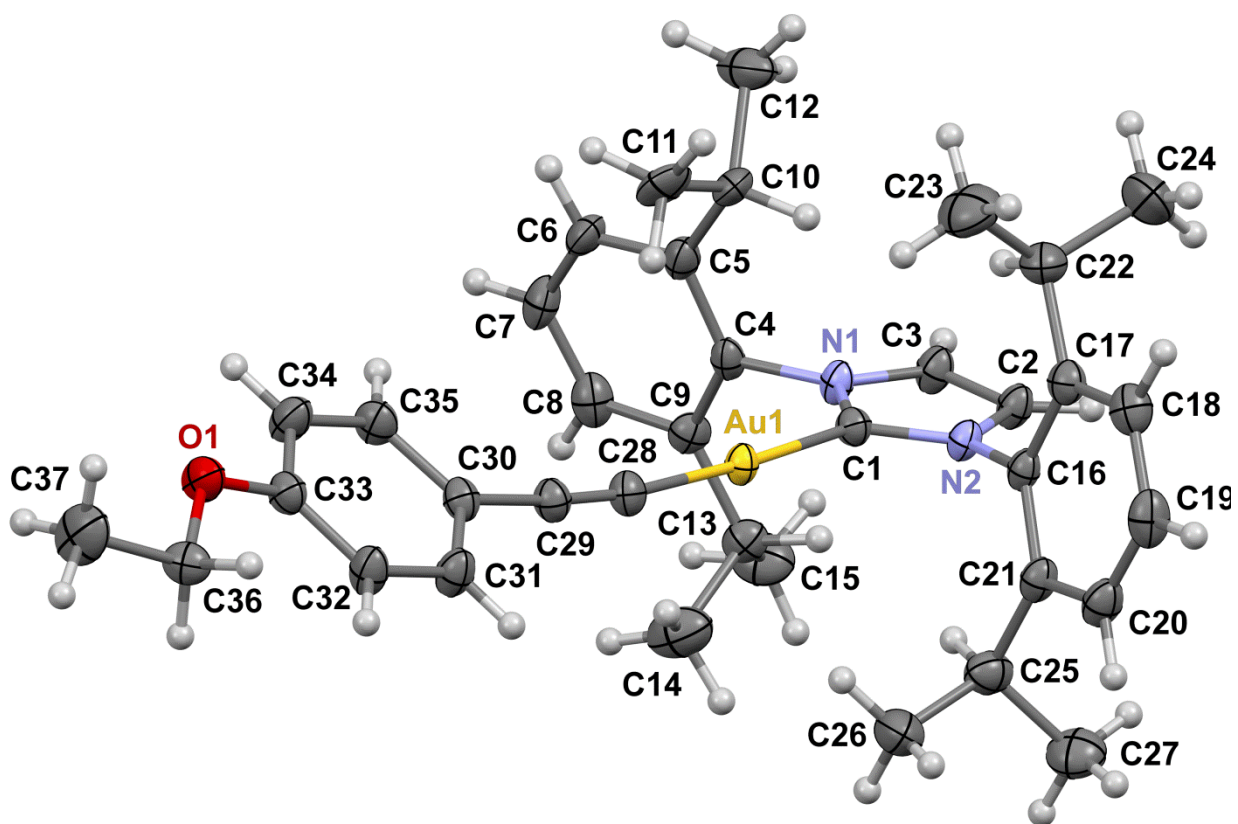

3c

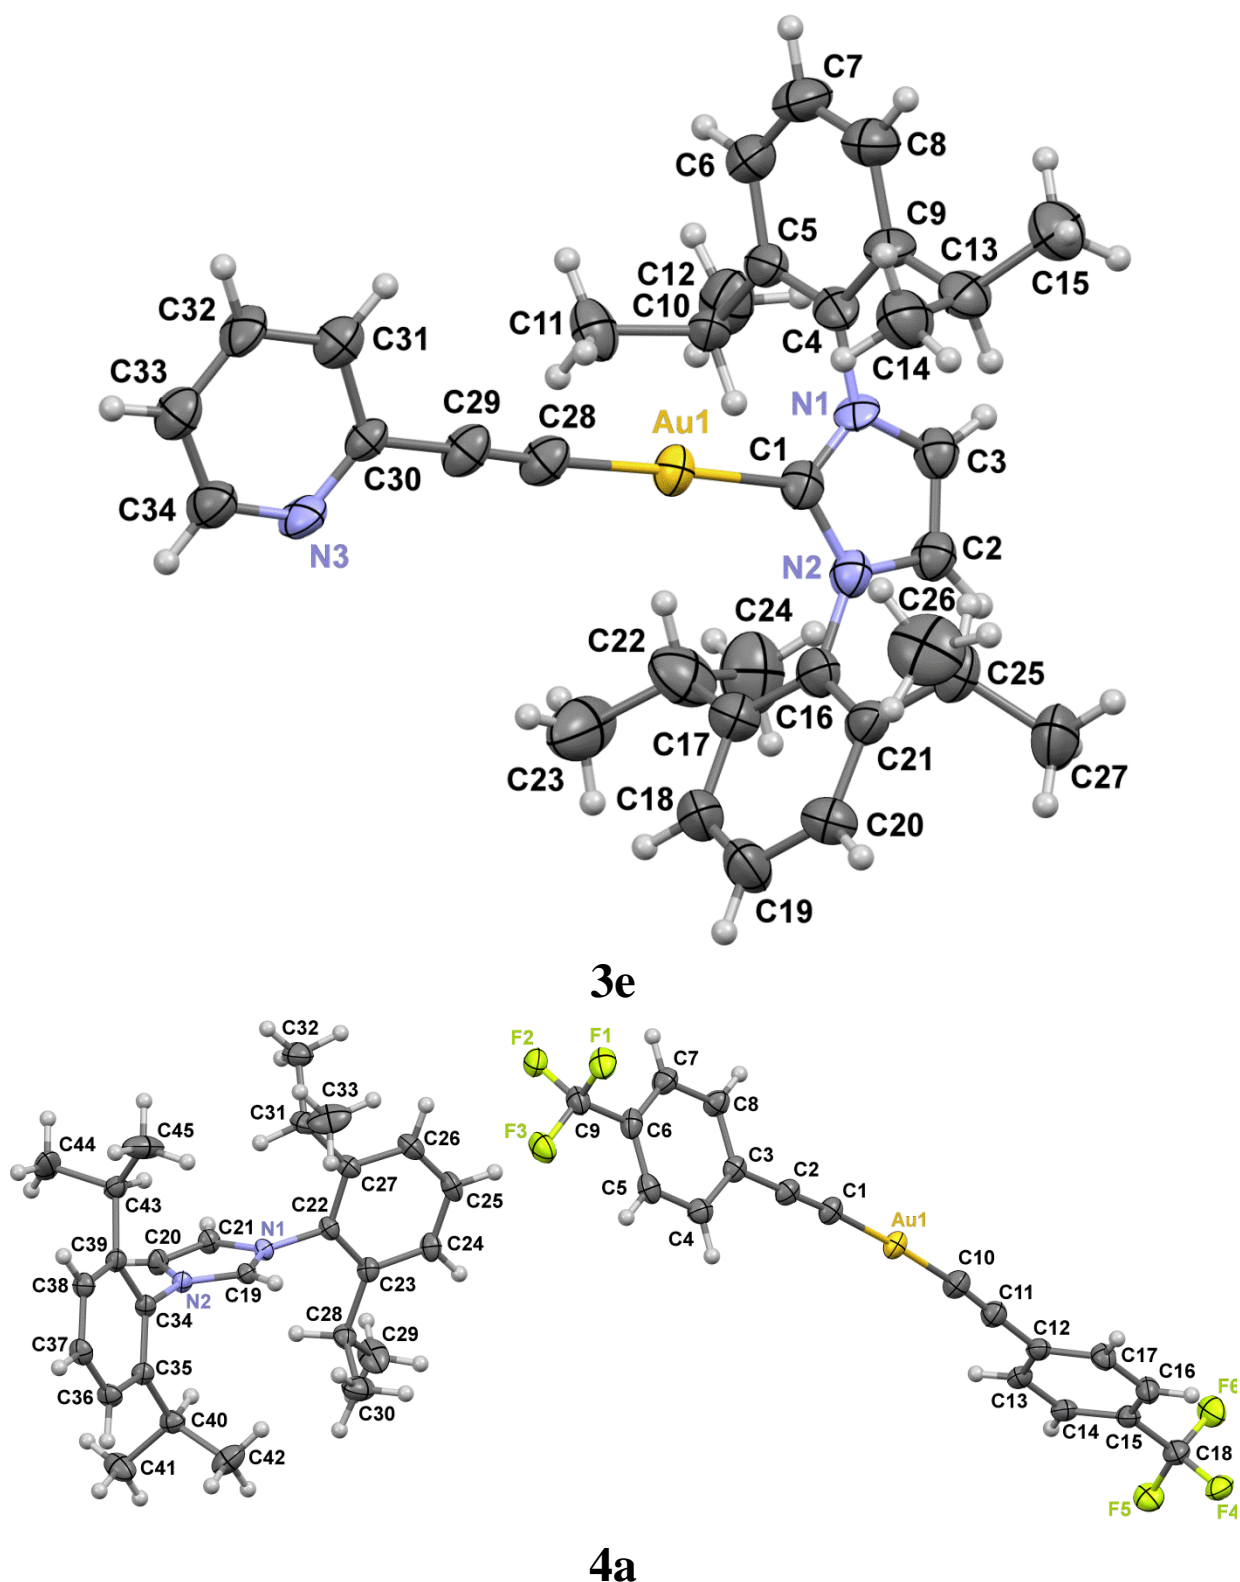

**Figure S52.** Crystal structures of **3a**, **3b**, **3c**, **3e** and **4a** (only one molecule for modification **3a-II** and in **3e** is shown). Thermal ellipsoids are set to a 50% probability level. Disorder is omitted.

**Table S5.** Selected bond distances (Å) and C-Au-C angles (°).

| Complex                   | Au-C <sub>NHC</sub>     | Au-C <sub>C≡C</sub>     | C≡C                     | C=C <sub>Me/Ar</sub>    | C <sub>Au</sub> -N (NHC) | N-C <sub>=</sub> (NHC)  | C=C (NHC)               | C-Au-C                |
|---------------------------|-------------------------|-------------------------|-------------------------|-------------------------|--------------------------|-------------------------|-------------------------|-----------------------|
| IPr-Au-C≡CMe <sup>3</sup> | 2.048(13),<br>2.038(12) | 1.998(12),<br>2.003(12) | 1.127(18),<br>1.174(18) | 1.51(2), 1.49(2)        | 1.322(17)-<br>1.358(17)  | 1.329(16)-<br>1.422(15) | 1.294(19),<br>1.321(18) | 175.9(6),<br>178.9(5) |
| <b>3f<sup>2</sup></b>     | 2.018(7)                | 1.976(7)                | 1.203(10)               | 1.457(10)               | 1.348(9),<br>1.357(9)    | 1.374(9),<br>1.387(9)   | 1.349(10)               | 177.8(5)              |
| <b>3a (3a-I, 3a-II)</b>   | 2.003(3)-<br>2.0088(19) | 1.974(2)-<br>1.985(3)   | 1.209(3)-<br>1.220(3)   | 1.431(5)-<br>1.446(3)   | 1.354(4)-<br>1.359(4)    | 1.378(4)-<br>1.384(2)   | 1.349(5)-<br>1.353(4)   | 175.1(2)-<br>178.9(6) |
| <b>3b</b>                 | 2.017(8)                | 2.004(8)                | 1.193(12)               | 1.453(13)               | 1.370(11),<br>1.334(10)  | 1.390(10),<br>1.379(11) | 1.352(12)               | 178.3(3)              |
| <b>3c</b>                 | 2.012(3),<br>2.014(3)   | 1.978(3),<br>1.984(4)   | 1.219(4),<br>1.213(5)   | 1.445(4),<br>1.447(5)   | 1.355(4)-<br>1.369(4)    | 1.377(4)-<br>1.393(4)   | 1.352(5),<br>1.352(5)   | 176.85(13)            |
| <b>3e</b>                 | 2.021(8),<br>2.007(8)   | 1.999(8),<br>2.052(10)  | 1.189(12),<br>1.143(14) | 1.470(12),<br>1.485(15) | 1.343(11)-<br>1.386(11)  | 1.354(11)-<br>1.394(10) | 1.352(12),<br>1.341(13) | 177.8(3),<br>178.7(4) |
| <b>3h*</b>                | 2.022(6)                | 1.994(6)                | 1.207(8)                | 1.436(8)                | 1.347(7),<br>1.358(7)    | 1.380(7),<br>1.381(7)   | 1.397(8)**              | 175.1(2)              |
| <b>4a</b>                 | -                       | 1.977(2),<br>1.980(2)   | 1.213(3),<br>1.216(3)   | 1.436(3),<br>1.431(3)   | -                        | -                       | -                       | 176.58(9)             |

\* According to CSD<sup>1</sup>, the structure remains unpublished. Its CCDC deposition number is 1578124, and the CSD refcode is JIRHIE, DOI: 10.5517/ccdc.csd.cc1pz572

\*\* This value corresponds to a C-C bond within a fused benzene ring.

## References:

1. C. R. Groom, I. J. Bruno, M. P. Lightfoot, S. C. Ward, The Cambridge Structural Database, *Acta Cryst.*, 2016, **B72**, 171. CSD, version 5.43, updates up to November 2022.
2. S. Gaillard, A. M. Z. Slawin, S. P. Nolan, A *N*-heterocyclic carbene gold hydroxide complex: a golden synthon, *Chem. Commun.*, 2010, **46**, 2742.
3. A. S. K. Hashmi, T. Lauterbach, P. Nösel, M. H. Vilhelmsen, M. Rudolph, F. Rominger, Dual Gold Catalysis:  $\sigma,\pi$ -Propyne Acetylide and Hydroxyl-Bridged Digold Complexes as Easy-To-Prepare and Easy-To-Handle Precatalysts, *Chem.-Eur. J.*, 2013, **19**, 1058.

## 12. Summary of crystallographic data

**Table S6.** Crystal data, data collection and structure refinement details for **3a**, **3b**•CH<sub>2</sub>Cl<sub>2</sub>, **3c**•0.92(CH<sub>2</sub>Cl<sub>2</sub>), **3e** and **4a**.

| Identification code                   | <b>3a-I</b>                                                     | <b>3-II</b>                                                     | <b>3b</b> •CH <sub>2</sub> Cl <sub>2</sub>                       | <b>3c</b> •0.92(CH <sub>2</sub> Cl <sub>2</sub> )                           | <b>3e</b>                                        | <b>4a</b>                                                       |
|---------------------------------------|-----------------------------------------------------------------|-----------------------------------------------------------------|------------------------------------------------------------------|-----------------------------------------------------------------------------|--------------------------------------------------|-----------------------------------------------------------------|
| Empirical formula                     | C <sub>36</sub> H <sub>40</sub> AuF <sub>3</sub> N <sub>2</sub> | C <sub>36</sub> H <sub>40</sub> AuF <sub>3</sub> N <sub>2</sub> | C <sub>38</sub> H <sub>48</sub> AuCl <sub>2</sub> N <sub>3</sub> | C <sub>37.92</sub> H <sub>46.84</sub> AuCl <sub>1.84</sub> N <sub>2</sub> O | C <sub>34</sub> H <sub>40</sub> AuN <sub>3</sub> | C <sub>45</sub> H <sub>45</sub> AuF <sub>6</sub> N <sub>2</sub> |
| Formula weight                        | 754.66                                                          | 754.66                                                          | 814.66                                                           | 808.76                                                                      | 687.65                                           | 924.79                                                          |
| Temperature, K                        | 99.9(4)                                                         | 100(2) K                                                        | 100(2)                                                           | 100(2)                                                                      | 100.0(5)                                         | 100(2)                                                          |
| Wavelength, Å                         | 0.71073                                                         | 0.71073                                                         | 0.71073                                                          | 0.71073                                                                     | 1.54184                                          | 0.71073                                                         |
| Crystal system                        | Triclinic                                                       | Triclinic                                                       | Monoclinic                                                       | Monoclinic                                                                  | Monoclinic                                       | Monoclinic                                                      |
| Space group                           | P $\bar{1}$                                                     | P $\bar{1}$                                                     | P2 <sub>1</sub> /n                                               | P2 <sub>1</sub> /n                                                          | P2 <sub>1</sub>                                  | P2 <sub>1</sub> /c                                              |
| Unit cell dimensions                  |                                                                 |                                                                 |                                                                  |                                                                             |                                                  |                                                                 |
| a, Å                                  | 10.48248(7)                                                     | 16.6955(4)                                                      | 13.8463(11)                                                      | 22.0775(11)                                                                 | 12.44412(8)                                      | 19.8123(3)                                                      |
| b, Å                                  | 11.13296(7)                                                     | 18.1173(5)                                                      | 15.2509(12)                                                      | 15.1913(7)                                                                  | 17.19895(11)                                     | 12.4220(2)                                                      |
| c, Å                                  | 14.92534(9)                                                     | 20.6902(5)                                                      | 17.2099(14)                                                      | 24.3230(12)                                                                 | 14.80376(10)                                     | 17.1873(2)                                                      |
| $\alpha$ , °                          | 91.9967(5)                                                      | 67.9350(10)                                                     | 90                                                               | 90                                                                          | 90                                               | 90                                                              |
| $\beta$ , °                           | 90.9661(5)                                                      | 87.1560(10)                                                     | 92.158(3)                                                        | 115.297(2)                                                                  | 98.9726(6)                                       | 107.4140(10)                                                    |
| $\gamma$ , °                          | 101.0360(6)                                                     | 63.2460(10)                                                     | 90                                                               | 90                                                                          | 90                                               | 90                                                              |
| Volume, Å <sup>3</sup>                | 1708.062(19)                                                    | 5124.8(2)                                                       | 3631.6(5)                                                        | 7375.3(6)                                                                   | 3129.61(4)                                       | 4036.07(10)                                                     |
| Z                                     | 2                                                               | 6                                                               | 4                                                                | 8                                                                           | 4                                                | 4                                                               |
| Calculated density, g/cm <sup>3</sup> | 1.467                                                           | 1.467                                                           | 1.490                                                            | 1.457                                                                       | 1.459                                            | 1.522                                                           |
| $\mu$ , mm <sup>-1</sup>              | 4.348                                                           | 4.347                                                           | 4.228                                                            | 4.153                                                                       | 9.011                                            | 3.706                                                           |
| F(000)                                | 752                                                             | 2256                                                            | 1640                                                             | 3252.8                                                                      | 1376                                             | 1848                                                            |
| Crystal size, mm                      | 0.17×0.09×0.08                                                  | 0.27×0.24×0.20                                                  | 0.23×0.10×0.09                                                   | 0.35×0.24×0.09                                                              | 0.14×0.11×0.08                                   | 0.50×0.15×0.03                                                  |



**Table S6 (cont.).** Crystal data, data collection and structure refinement details for **3a**, **3b**•CH<sub>2</sub>Cl<sub>2</sub>, **3c**•0.92(CH<sub>2</sub>Cl<sub>2</sub>), **3e** and **4a**.

| Identification code                                                                | <b>3a-I</b>       | <b>3a-II</b>       | <b>3b</b> •CH <sub>2</sub> Cl <sub>2</sub> | <b>3c</b> •0.92(CH <sub>2</sub> Cl <sub>2</sub> ) | <b>3e</b>         | <b>4a</b>         |
|------------------------------------------------------------------------------------|-------------------|--------------------|--------------------------------------------|---------------------------------------------------|-------------------|-------------------|
| $\theta$ range, °                                                                  | 2.269-34.249      | 1.867 to 25.250    | 1.854-25.049                               | 1.629-34.465                                      | 3.022-77.864      | 2.057-33.157      |
| Index ranges                                                                       | -16 ≤ h ≤ 16      | -20 ≤ h ≤ 20       | -16 ≤ h ≤ 16                               | -35 ≤ h ≤ 35                                      | -15 ≤ h ≤ 15      | -30 ≤ h ≤ 30      |
|                                                                                    | -17 ≤ k ≤ 17      | -21 ≤ k ≤ 21       | -17 ≤ k ≤ 18                               | -24 ≤ k ≤ 24                                      | -21 ≤ k ≤ 20      | -18 ≤ k ≤ 19      |
|                                                                                    | -23 ≤ l ≤ 23      | -24 ≤ l ≤ 24       | -20 ≤ l ≤ 20                               | -38 ≤ l ≤ 38                                      | -18 ≤ l ≤ 18      | -26 ≤ l ≤ 26      |
| Reflections                                                                        |                   |                    |                                            |                                                   |                   |                   |
| Collected                                                                          | 80582             | 186395             | 62921                                      | 275992                                            | 87963             | 154358            |
| Independent [ $R_{\text{int}}$ ]                                                   | 14035 [0.0242]    | 18522 [0.0333]     | 6443 [0.0877]                              | 31110 [0.0629]                                    | 13201 [0.0285]    | 15386 [0.0441]    |
| Observed (with $I > 2\sigma(I)$ )                                                  | 12083             | 16684              | 5030                                       | 22723                                             | 13134             | 12409             |
| Completeness to $\theta_{\text{full}} / \theta_{\text{max}}$                       | 1.000 / 0.986     | 0.999 / 0.999      | 0.999 / 0.999                              | 0.999 / 0.998                                     | 1.000 / 0.998     | 0.999 / 0.999     |
| $T_{\text{max}} / T_{\text{min}}$                                                  | 0.760 / 0.583     | 0.435 / 0.377      | 0.494 / 0.339                              | 0.271 / 0.176                                     | 0.752 / 0.408     | 0.269 / 0.183     |
| Data / restraints / parameters                                                     | 14035 / 374 / 522 | 18522 / 128 / 1242 | 6443 / 33 / 429                            | 31110 / 217 / 894                                 | 13201 / 347 / 849 | 15386 / 626 / 588 |
| Goodness-of-fit on $F^2$                                                           | 1.059             | 1.032              | 1.185                                      | 1.023                                             | 1.125             | 1.042             |
| $R1 / wR2$ indices ( $I > 2\sigma(I)$ )                                            | 0.0229 / 0.0531   | 0.0261 / 0.0621    | 0.0508 / 0.1310                            | 0.0417 / 0.0956                                   | 0.0325 / 0.0766   | 0.0280 / 0.0559   |
| $R1 / wR2$ indices (all data)                                                      | 0.0300 / 0.0551   | 0.0305 / 0.0646    | 0.0702 / 0.1467                            | 0.0677 / 0.1068                                   | 0.0326 / 0.0766   | 0.0418 / 0.0608   |
| Absolute structure parameter                                                       | -                 | -                  | -                                          | -                                                 | -0.001(6)         | -                 |
| $\Delta\rho_{\text{max}} / \Delta\rho_{\text{max}}, \bar{e} \cdot \text{\AA}^{-3}$ | 1.542 / -0.798    | 3.208 / -1.436     | 2.602 / -1.202                             | 2.065 / -1.794                                    | 1.202 / -1.455    | 0.973 / -1.263    |
| CCDC deposition number                                                             | 2282626           | 2282627            | 2282628                                    | 2282629                                           | 2321627           | 2282630           |

## The crystal structure of **3a**

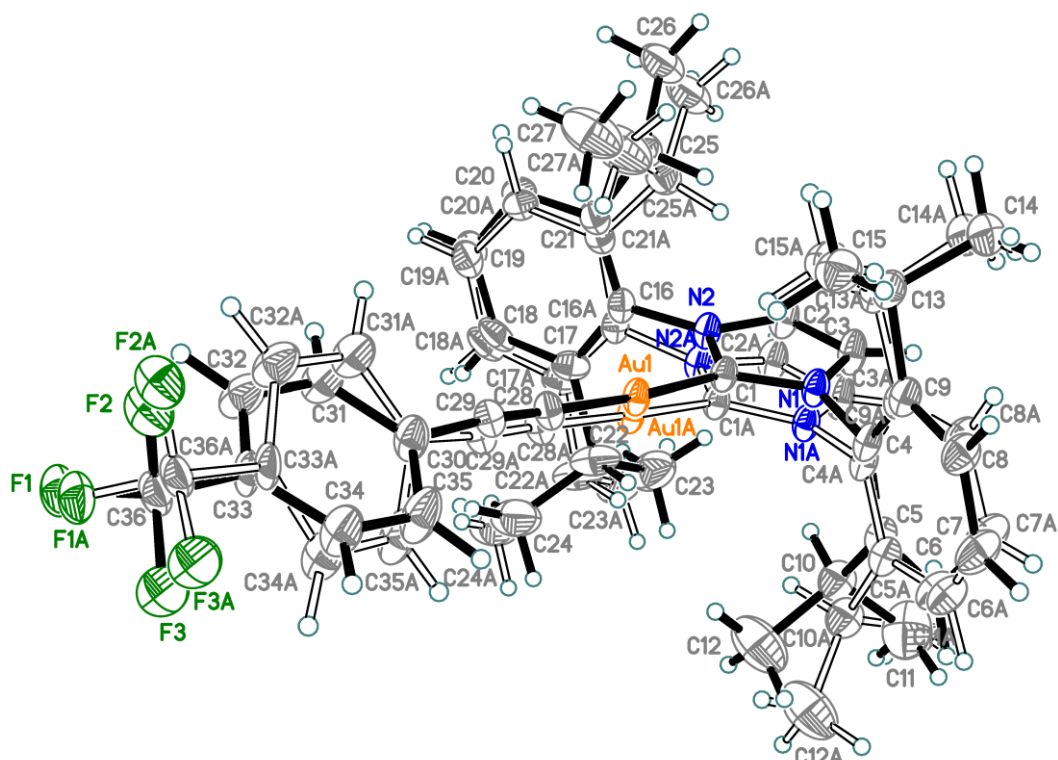

**Figure S53.** The molecular structure of **3a-I** (complex **3a**, 1<sup>st</sup> polymorph modification). Thermal ellipsoids are shown at a 50% probability level. Hydrogen atoms are drawn as fixed-size spheres. The entire molecule is disordered over two positions. The overlay of both components of the disorder is shown. The minor disorder component is drawn with open solid lines. The disorder ratio is 0.6011(10):0.3989(10).

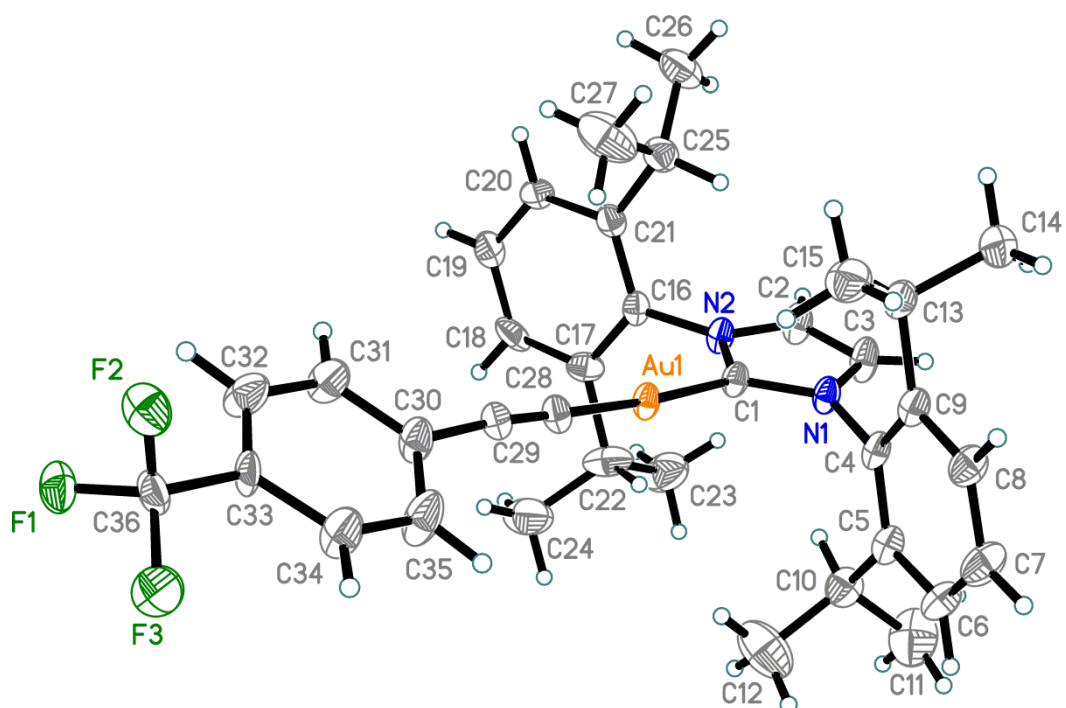

**Figure S54.** The major component of the disordered molecule in **3a-I**. Thermal ellipsoids are shown at a 50% probability level. Hydrogen atoms are drawn as fixed-size spheres.

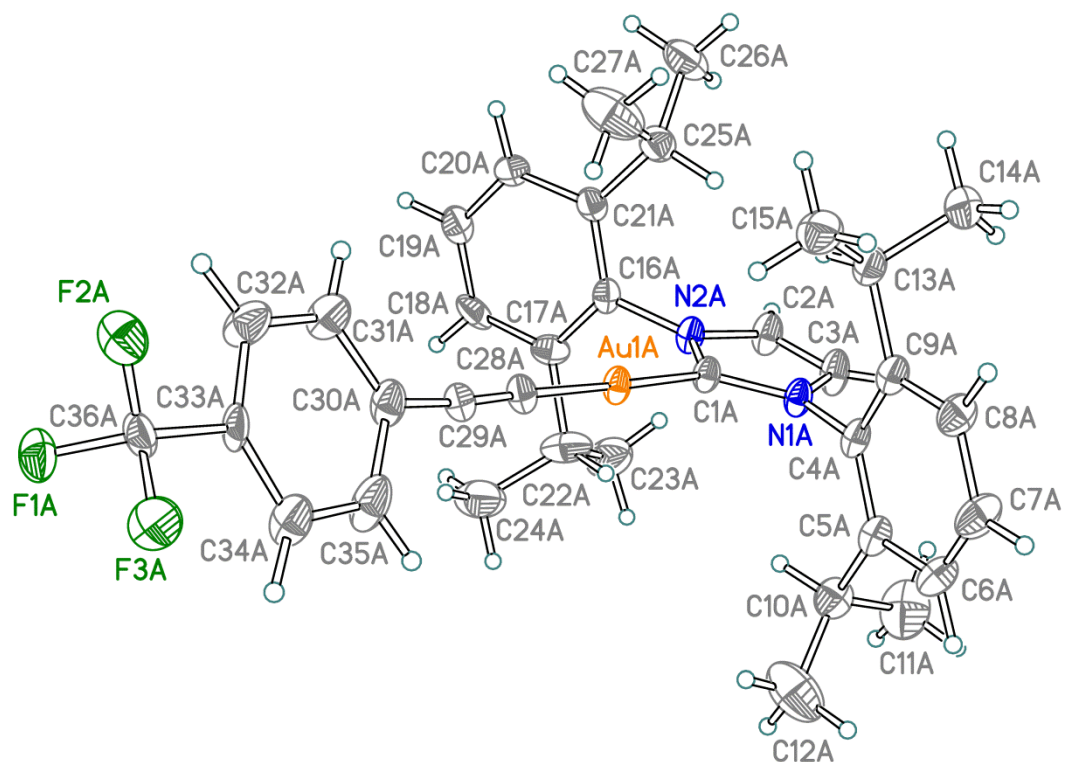

**Figure S55.** The minor component of the disordered molecule in **3a-I**. Thermal ellipsoids are shown at a 50% probability level. Hydrogen atoms are drawn as fixed-size spheres.

**Table S7.** Selected bond distances (Å) for **3a-I**.

|         |            |           |          |
|---------|------------|-----------|----------|
| Au1-C1  | 2.0088(19) | Au1A-C1A  | 2.006(2) |
| Au1-C28 | 1.974(2)   | Au1A-C28A | 1.985(3) |
| N1-C1   | 1.358(2)   | N1A-C1A   | 1.356(2) |
| N1-C3   | 1.384(2)   | N1A-C3A   | 1.382(3) |
| N1-C4   | 1.445(2)   | N1A-C4A   | 1.444(3) |
| C1-N2   | 1.357(2)   | C1A-N2A   | 1.356(2) |
| N2-C2   | 1.383(2)   | N2A-C2A   | 1.382(3) |
| N2-C16  | 1.442(2)   | N2A-C16A  | 1.444(3) |
| C2-C3   | 1.353(3)   | C2A-C3A   | 1.353(4) |
| C4-C5   | 1.399(2)   | C4A-C5A   | 1.397(2) |
| C4-C9   | 1.398(2)   | C4A-C9A   | 1.396(2) |
| C5-C6   | 1.395(2)   | C5A-C6A   | 1.394(3) |
| C5-C10  | 1.524(2)   | C5A-C10A  | 1.523(3) |
| C6-C7   | 1.379(2)   | C6A-C7A   | 1.379(2) |
| C7-C8   | 1.380(2)   | C7A-C8A   | 1.380(2) |
| C8-C9   | 1.394(2)   | C8A-C9A   | 1.393(3) |
| C9-C13  | 1.525(2)   | C9A-C13A  | 1.523(2) |
| C10-C11 | 1.535(3)   | C10A-C11A | 1.534(3) |
| C10-C12 | 1.534(2)   | C10A-C12A | 1.533(3) |
| C13-C14 | 1.534(2)   | C13A-C14A | 1.534(2) |
| C13-C15 | 1.535(2)   | C13A-C15A | 1.534(3) |
| C16-C17 | 1.399(2)   | C16A-C17A | 1.398(2) |
| C16-C21 | 1.395(2)   | C16A-C21A | 1.396(2) |
| C17-C18 | 1.394(2)   | C17A-C18A | 1.395(3) |
| C17-C22 | 1.523(2)   | C17A-C22A | 1.524(3) |
| C18-C19 | 1.380(2)   | C18A-C19A | 1.380(2) |
| C19-C20 | 1.378(2)   | C19A-C20A | 1.378(2) |
| C20-C21 | 1.396(2)   | C20A-C21A | 1.396(3) |
| C21-C25 | 1.523(2)   | C21A-C25A | 1.523(3) |
| C22-C23 | 1.533(2)   | C22A-C23A | 1.531(3) |
| C22-C24 | 1.542(2)   | C22A-C24A | 1.536(3) |
| C25-C26 | 1.533(2)   | C25A-C26A | 1.533(3) |
| C25-C27 | 1.533(2)   | C25A-C27A | 1.533(3) |
| C28-C29 | 1.209(3)   | C28A-C29A | 1.220(3) |
| C29-C30 | 1.435(3)   | C29A-C30A | 1.446(3) |
| C30-C31 | 1.384(2)   | C30A-C31A | 1.394(3) |
| C30-C35 | 1.383(2)   | C30A-C35A | 1.393(3) |
| C31-C32 | 1.390(3)   | C31A-C32A | 1.393(3) |
| C32-C33 | 1.381(2)   | C32A-C33A | 1.385(3) |

|         |          |           |          |
|---------|----------|-----------|----------|
| C33-C34 | 1.381(2) | C33A-C34A | 1.386(3) |
| C33-C36 | 1.467(5) | C33A-C36A | 1.543(9) |
| C34-C35 | 1.391(3) | C34A-C35A | 1.393(3) |
| C36-F1  | 1.341(4) | C36A-F1A  | 1.355(7) |
| C36-F2  | 1.358(6) | C36A-F2A  | 1.368(9) |
| C36-F3  | 1.329(5) | C36A-F3A  | 1.349(8) |

**Table S8.** Selected bond angles (°) for **3a-I**.

|             |            |                |           |
|-------------|------------|----------------|-----------|
| C28-Au1-C1  | 175.1(2)   | C28A-Au1A-C1A  | 178.9(6)  |
| C1-N1-C3    | 111.23(19) | C1A-N1A-C3A    | 110.6(3)  |
| C1-N1-C4    | 123.9(5)   | C1A-N1A-C4A    | 126.5(7)  |
| C3-N1-C4    | 124.7(5)   | C3A-N1A-C4A    | 122.7(7)  |
| N1-C1-Au1   | 126.23(16) | N1A-C1A-Au1A   | 126.7(2)  |
| N2-C1-Au1   | 128.73(16) | N1A-C1A-N2A    | 104.9(3)  |
| N2-C1-N1    | 104.27(19) | N2A-C1A-Au1A   | 128.0(2)  |
| C1-N2-C2    | 111.30(19) | C1A-N2A-C2A    | 110.9(3)  |
| C1-N2-C16   | 125.9(4)   | C1A-N2A-C16A   | 126.0(6)  |
| C2-N2-C16   | 122.8(4)   | C2A-N2A-C16A   | 123.0(6)  |
| C3-C2-N2    | 106.6(2)   | C3A-C2A-N2A    | 106.6(3)  |
| C2-C3-N1    | 106.6(2)   | C2A-C3A-N1A    | 106.9(3)  |
| C5-C4-N1    | 118.2(3)   | C5A-C4A-N1A    | 118.9(5)  |
| C9-C4-N1    | 119.0(3)   | C9A-C4A-N1A    | 117.4(5)  |
| C9-C4-C5    | 122.7(3)   | C9A-C4A-C5A    | 123.7(4)  |
| C4-C5-C10   | 122.3(4)   | C4A-C5A-C10A   | 122.8(6)  |
| C6-C5-C4    | 117.1(7)   | C6A-C5A-C4A    | 117.4(10) |
| C6-C5-C10   | 120.6(7)   | C6A-C5A-C10A   | 119.8(10) |
| C7-C6-C5    | 121.9(13)  | C7A-C6A-C5A    | 119.4(19) |
| C6-C7-C8    | 119.2(13)  | C6A-C7A-C8A    | 123(2)    |
| C7-C8-C9    | 122.0(9)   | C7A-C8A-C9A    | 119.7(14) |
| C4-C9-C13   | 122.4(3)   | C4A-C9A-C13A   | 123.5(5)  |
| C8-C9-C4    | 117.1(4)   | C8A-C9A-C4A    | 117.2(7)  |
| C8-C9-C13   | 120.5(4)   | C8A-C9A-C13A   | 119.3(7)  |
| C5-C10-C11  | 112.1(13)  | C5A-C10A-C11A  | 109.5(19) |
| C5-C10-C12  | 109.4(5)   | C5A-C10A-C12A  | 111.4(7)  |
| C12-C10-C11 | 111.3(7)   | C12A-C10A-C11A | 114.3(9)  |
| C9-C13-C14  | 110.4(4)   | C9A-C13A-C14A  | 110.0(6)  |
| C9-C13-C15  | 110.5(3)   | C9A-C13A-C15A  | 110.9(5)  |
| C14-C13-C15 | 111.5(3)   | C14A-C13A-C15A | 110.7(4)  |
| C17-C16-N2  | 120.5(4)   | C17A-C16A-N2A  | 117.4(7)  |

|             |           |                |           |
|-------------|-----------|----------------|-----------|
| C21-C16-N2  | 118.0(3)  | C21A-C16A-N2A  | 117.3(6)  |
| C21-C16-C17 | 121.5(4)  | C21A-C16A-C17A | 125.2(6)  |
| C16-C17-C22 | 123.5(4)  | C16A-C17A-C22A | 123.7(8)  |
| C18-C17-C16 | 116.9(6)  | C18A-C17A-C16A | 117.6(10) |
| C18-C17-C22 | 119.5(5)  | C18A-C17A-C22A | 118.6(9)  |
| C19-C18-C17 | 123.4(9)  | C19A-C18A-C17A | 117.6(15) |
| C20-C19-C18 | 117.6(10) | C20A-C19A-C18A | 124.4(18) |
| C19-C20-C21 | 122.2(9)  | C19A-C20A-C21A | 119.7(16) |
| C16-C21-C20 | 118.1(5)  | C16A-C21A-C25A | 123.5(7)  |
| C16-C21-C25 | 122.4(4)  | C20A-C21A-C16A | 115.5(9)  |
| C20-C21-C25 | 119.4(5)  | C20A-C21A-C25A | 120.9(9)  |
| C17-C22-C23 | 111.8(5)  | C17A-C22A-C23A | 110.2(9)  |
| C17-C22-C24 | 112.0(6)  | C17A-C22A-C24A | 111.6(11) |
| C23-C22-C24 | 107.1(5)  | C23A-C22A-C24A | 106.5(8)  |
| C21-C25-C26 | 111.7(4)  | C21A-C25A-C26A | 112.3(8)  |
| C21-C25-C27 | 109.6(7)  | C21A-C25A-C27A | 109.8(11) |
| C27-C25-C26 | 112.7(5)  | C26A-C25A-C27A | 110.4(7)  |
| C29-C28-Au1 | 177.8(11) | C29A-C28A-Au1A | 178.4(16) |
| C28-C29-C30 | 172.8(7)  | C28A-C29A-C30A | 173.9(13) |
| C31-C30-C29 | 120.4(5)  | C31A-C30A-C29A | 125.2(8)  |
| C35-C30-C29 | 121.7(5)  | C35A-C30A-C29A | 114.8(8)  |
| C35-C30-C31 | 117.9(3)  | C35A-C30A-C31A | 119.7(4)  |
| C30-C31-C32 | 120.3(3)  | C32A-C31A-C30A | 121.8(4)  |
| C33-C32-C31 | 122.5(3)  | C33A-C32A-C31A | 115.3(5)  |
| C32-C33-C36 | 122.6(3)  | C32A-C33A-C34A | 125.9(6)  |
| C34-C33-C32 | 116.3(4)  | C32A-C33A-C36A | 113.5(5)  |
| C34-C33-C36 | 121.1(3)  | C34A-C33A-C36A | 120.3(5)  |
| C33-C34-C35 | 122.1(4)  | C33A-C34A-C35A | 116.1(6)  |
| C30-C35-C34 | 120.7(3)  | C34A-C35A-C30A | 120.9(5)  |
| F1-C36-C33  | 111.9(4)  | F1A-C36A-C33A  | 112.7(7)  |
| F1-C36-F2   | 105.2(5)  | F1A-C36A-F2A   | 104.9(8)  |
| F2-C36-C33  | 110.2(4)  | F2A-C36A-C33A  | 116.0(7)  |
| F3-C36-C33  | 113.6(4)  | F3A-C36A-C33A  | 112.4(6)  |
| F3-C36-F1   | 108.5(3)  | F3A-C36A-F1A   | 104.7(6)  |
| F3-C36-F2   | 107.1(4)  | F3A-C36A-F2A   | 105.2(7)  |

**Table S9.** Torsion angles (°) for **3a-I**.

|                |           |                    |            |
|----------------|-----------|--------------------|------------|
| Au1-C1-N2-C2   | 169.6(2)  | Au1A-C1A-N2A-C2A   | 173.6(4)   |
| Au1-C1-N2-C16  | -12.2(5)  | Au1A-C1A-N2A-C16A  | -2.7(8)    |
| N1-C1-N2-C2    | -0.8(3)   | N1A-C1A-N2A-C2A    | 0.0(6)     |
| N1-C1-N2-C16   | 177.4(3)  | N1A-C1A-N2A-C16A   | -176.2(5)  |
| N1-C4-C5-C6    | 177.9(10) | N1A-C4A-C5A-C6A    | 177.5(16)  |
| N1-C4-C5-C10   | -4.3(13)  | N1A-C4A-C5A-C10A   | -3(2)      |
| N1-C4-C9-C8    | -178.4(7) | N1A-C4A-C9A-C8A    | -177.1(12) |
| N1-C4-C9-C13   | 1.3(11)   | N1A-C4A-C9A-C13A   | 2.3(19)    |
| C1-N1-C3-C2    | -0.6(4)   | C1A-N1A-C3A-C2A    | 0.4(6)     |
| C1-N1-C4-C5    | 91.9(8)   | C1A-N1A-C4A-C5A    | 101.5(13)  |
| C1-N1-C4-C9    | -89.0(8)  | C1A-N1A-C4A-C9A    | -80.0(14)  |
| C1-N2-C2-C3    | 0.5(4)    | C1A-N2A-C2A-C3A    | 0.2(6)     |
| C1-N2-C16-C17  | -83.6(7)  | C1A-N2A-C16A-C17A  | -95.3(11)  |
| C1-N2-C16-C21  | 98.9(8)   | C1A-N2A-C16A-C21A  | 87.8(13)   |
| N2-C2-C3-N1    | 0.1(4)    | N2A-C2A-C3A-N1A    | -0.4(6)    |
| N2-C16-C17-C18 | -174.0(8) | N2A-C16A-C17A-C18A | -177.9(13) |
| N2-C16-C17-C22 | 4.3(10)   | N2A-C16A-C17A-C22A | 5.9(16)    |
| N2-C16-C21-C20 | 172.7(9)  | N2A-C16A-C21A-C20A | 179.5(14)  |
| N2-C16-C21-C25 | -10.4(13) | N2A-C16A-C21A-C25A | -3(2)      |
| C2-N2-C16-C17  | 94.4(7)   | C2A-N2A-C16A-C17A  | 88.8(11)   |
| C2-N2-C16-C21  | -83.1(8)  | C2A-N2A-C16A-C21A  | -88.0(13)  |
| C3-N1-C1-Au1   | -169.8(2) | C3A-N1A-C1A-Au1A   | -173.9(4)  |
| C3-N1-C1-N2    | 0.9(3)    | C3A-N1A-C1A-N2A    | -0.3(6)    |
| C3-N1-C4-C5    | -82.6(9)  | C3A-N1A-C4A-C5A    | -83.5(14)  |
| C3-N1-C4-C9    | 96.4(8)   | C3A-N1A-C4A-C9A    | 94.9(13)   |
| C4-N1-C1-Au1   | 15.0(4)   | C4A-N1A-C1A-Au1A   | 1.5(8)     |
| C4-N1-C1-N2    | -174.3(3) | C4A-N1A-C1A-N2A    | 175.2(5)   |
| C4-N1-C3-C2    | 174.6(3)  | C4A-N1A-C3A-C2A    | -175.2(5)  |
| C4-C5-C6-C7    | 0.3(12)   | C4A-C5A-C6A-C7A    | 0.0(17)    |
| C4-C5-C10-C11  | 128.1(10) | C4A-C5A-C10A-C11A  | 98.0(19)   |
| C4-C5-C10-C12  | -107.9(9) | C4A-C5A-C10A-C12A  | -134.6(13) |
| C4-C9-C13-C14  | -114.3(7) | C4A-C9A-C13A-C14A  | -115.9(12) |
| C4-C9-C13-C15  | 121.8(7)  | C4A-C9A-C13A-C15A  | 121.4(11)  |
| C5-C4-C9-C8    | 0.6(11)   | C5A-C4A-C9A-C8A    | 1.3(19)    |
| C5-C4-C9-C13   | -179.6(8) | C5A-C4A-C9A-C13A   | -179.3(13) |
| C5-C6-C7-C8    | 1.0(19)   | C5A-C6A-C7A-C8A    | 0(3)       |
| C6-C5-C10-C11  | -54.1(10) | C6A-C5A-C10A-C11A  | -82.4(17)  |
| C6-C5-C10-C12  | 69.8(8)   | C6A-C5A-C10A-C12A  | 44.9(14)   |
| C6-C7-C8-C9    | -1.6(19)  | C6A-C7A-C8A-C9A    | 0(3)       |

|                 |            |                     |            |
|-----------------|------------|---------------------|------------|
| C7-C8-C9-C4     | 0.8(13)    | C7A-C8A-C9A-C4A     | -1(2)      |
| C7-C8-C9-C13    | -179.0(10) | C7A-C8A-C9A-C13A    | 179.6(16)  |
| C8-C9-C13-C14   | 65.4(7)    | C8A-C9A-C13A-C14A   | 63.5(11)   |
| C8-C9-C13-C15   | -58.4(7)   | C8A-C9A-C13A-C15A   | -59.2(11)  |
| C9-C4-C5-C6     | -1.1(9)    | C9A-C4A-C5A-C6A     | -0.8(14)   |
| C9-C4-C5-C10    | 176.7(9)   | C9A-C4A-C5A-C10A    | 178.7(15)  |
| C10-C5-C6-C7    | -177.6(14) | C10A-C5A-C6A-C7A    | -180(2)    |
| C16-N2-C2-C3    | -177.8(3)  | C16A-N2A-C2A-C3A    | 176.6(5)   |
| C16-C17-C18-C19 | 1.2(10)    | C16A-C17A-C18A-C19A | -1.1(15)   |
| C16-C17-C22-C23 | -87.3(8)   | C16A-C17A-C22A-C23A | -98.4(13)  |
| C16-C17-C22-C24 | 152.5(8)   | C16A-C17A-C22A-C24A | 143.5(13)  |
| C16-C21-C25-C26 | 132.0(8)   | C16A-C21A-C25A-C26A | 126.4(14)  |
| C16-C21-C25-C27 | -102.3(10) | C16A-C21A-C25A-C27A | -110.4(16) |
| C17-C16-C21-C20 | -4.7(13)   | C17A-C16A-C21A-C20A | 3(2)       |
| C17-C16-C21-C25 | 172.1(8)   | C17A-C16A-C21A-C25A | -179.8(14) |
| C17-C18-C19-C20 | -4.1(15)   | C17A-C18A-C19A-C20A | 2(3)       |
| C18-C17-C22-C23 | 91.0(7)    | C18A-C17A-C22A-C23A | 85.4(12)   |
| C18-C17-C22-C24 | -29.2(9)   | C18A-C17A-C22A-C24A | -32.7(15)  |
| C18-C19-C20-C21 | 2.7(17)    | C18A-C19A-C20A-C21A | 0(3)       |
| C19-C20-C21-C16 | 1.6(16)    | C19A-C20A-C21A-C16A | -2(3)      |
| C19-C20-C21-C25 | -175.3(10) | C19A-C20A-C21A-C25A | -179.5(16) |
| C20-C21-C25-C26 | -51.2(11)  | C20A-C21A-C25A-C26A | -56.5(18)  |
| C20-C21-C25-C27 | 74.5(11)   | C20A-C21A-C25A-C27A | 66.7(18)   |
| C21-C16-C17-C18 | 3.4(9)     | C21A-C16A-C17A-C18A | -1.3(14)   |
| C21-C16-C17-C22 | -178.3(9)  | C21A-C16A-C17A-C22A | -177.5(15) |
| C22-C17-C18-C19 | -177.2(11) | C22A-C17A-C18A-C19A | 175.3(17)  |
| C29-C30-C31-C32 | -176.6(5)  | C29A-C30A-C31A-C32A | 174.1(10)  |
| C29-C30-C35-C34 | 174.8(5)   | C29A-C30A-C35A-C34A | -174.4(9)  |
| C30-C31-C32-C33 | -1.3(7)    | C30A-C31A-C32A-C33A | 2.6(9)     |
| C31-C30-C35-C34 | -3.5(8)    | C31A-C30A-C35A-C34A | 0.0(12)    |
| C31-C32-C33-C34 | 2.4(7)     | C31A-C32A-C33A-C34A | -6.7(11)   |
| C31-C32-C33-C36 | -179.1(4)  | C31A-C32A-C33A-C36A | 178.5(6)   |
| C32-C33-C34-C35 | -4.2(7)    | C32A-C33A-C34A-C35A | 7.1(12)    |
| C32-C33-C36-F1  | 42.4(7)    | C32A-C33A-C36A-F1A  | 86.4(9)    |
| C32-C33-C36-F2  | -74.2(6)   | C32A-C33A-C36A-F2A  | -34.5(11)  |
| C32-C33-C36-F3  | 165.7(4)   | C32A-C33A-C36A-F3A  | -155.6(6)  |
| C33-C34-C35-C30 | 4.9(8)     | C33A-C34A-C35A-C30A | -3.4(10)   |
| C34-C33-C36-F1  | -139.2(5)  | C34A-C33A-C36A-F1A  | -88.7(10)  |
| C34-C33-C36-F2  | 104.1(6)   | C34A-C33A-C36A-F2A  | 150.4(9)   |
| C34-C33-C36-F3  | -16.0(6)   | C34A-C33A-C36A-F3A  | 29.3(10)   |



|                 |          |                     |           |
|-----------------|----------|---------------------|-----------|
| C35-C30-C31-C32 | 1.7(8)   | C35A-C30A-C31A-C32A | 0.4(11)   |
| C36-C33-C34-C35 | 177.3(4) | C36A-C33A-C34A-C35A | -178.4(7) |

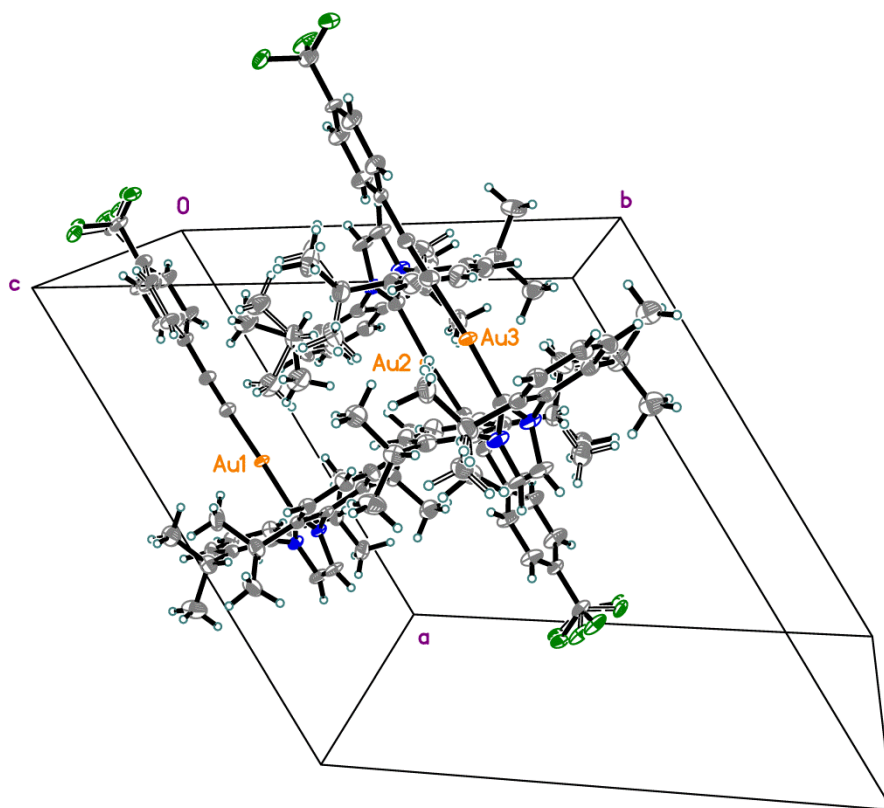

**Figure S56.** The crystal structure of **3a-II** (complex **3a**, 2<sup>nd</sup> polymorph modification). Three crystallographically inequivalent molecules are shown in the unit cell. Thermal ellipsoids are shown at a 50% probability level. Hydrogen atoms are drawn as fixed-size spheres.

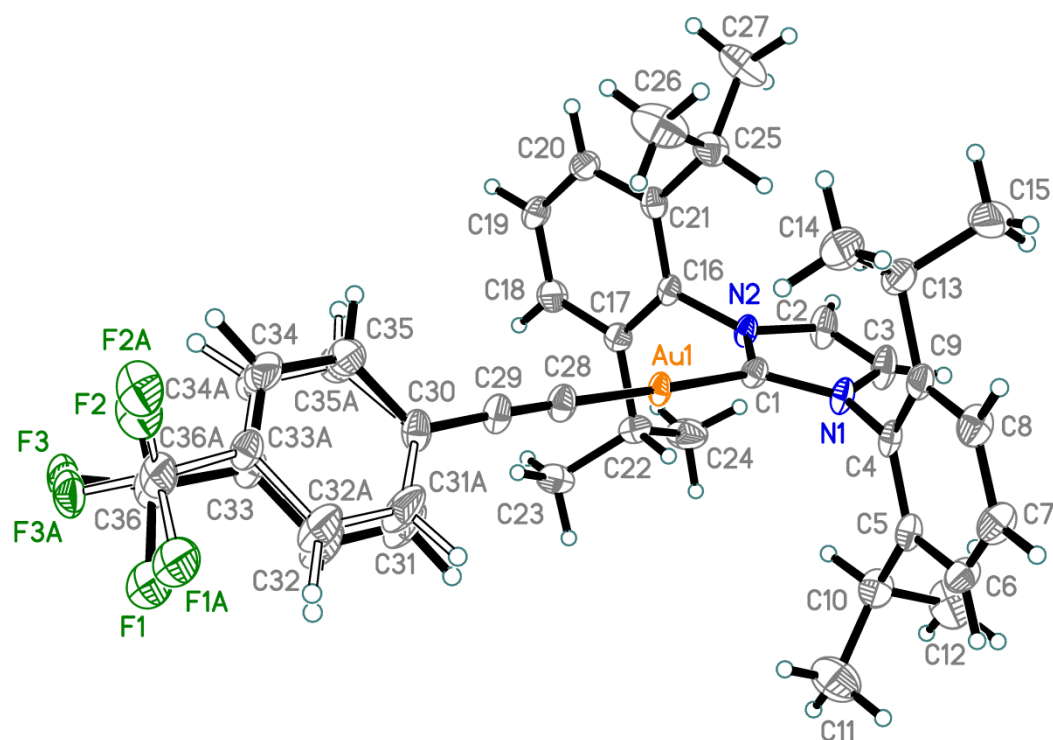

**Figure S57.** The 1<sup>st</sup> molecule **3a** in **3a-II**. Thermal ellipsoids are shown at a 50% probability level. Hydrogen atoms are drawn as fixed-size spheres. The disorder ratio for atoms C31..C36, F1..F3 / C31A..C36A, F1A..F3A is 0.862(17):0.138(17). The minor component of the disorder is drawn with open solid lines.

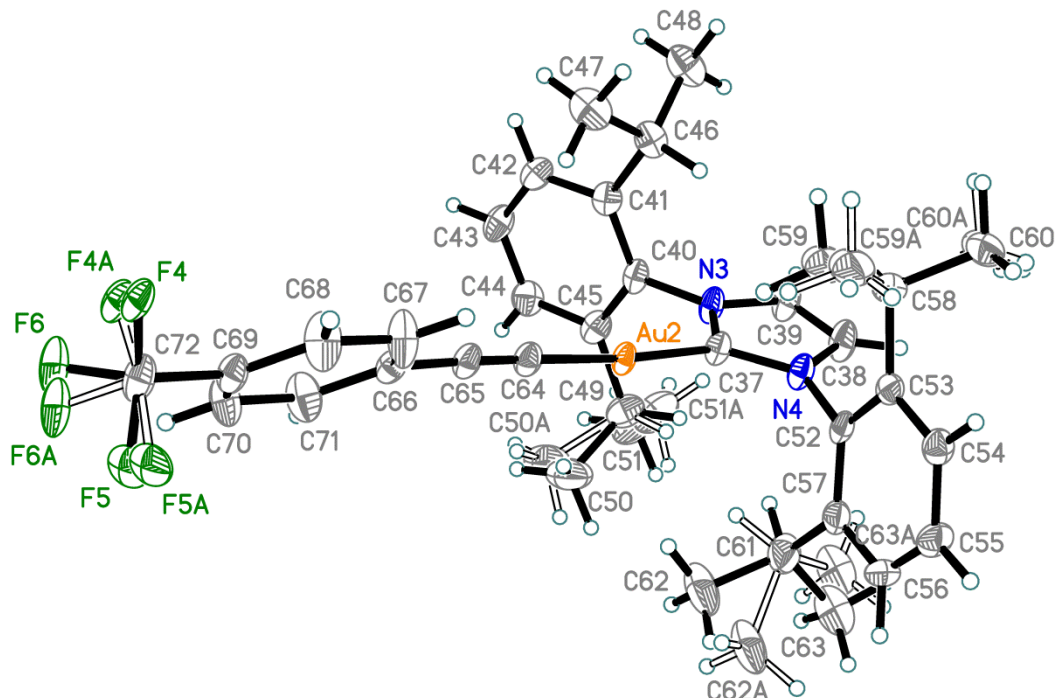

**Figure S58.** The 2<sup>nd</sup> molecule **3a** in **3a-II**. Thermal ellipsoids are shown at a 50% probability level. Hydrogen atoms are drawn as fixed-size spheres. The disorder ratios for groups of atoms are 0.88(2) : 0.12(2) for C50, C51 / C50A, C51A; 0.82(4) : 0.18(4) for C59, C60 / C59A, C60A; 0.503(7) : 0.497(7) for C62, C63 / C62A, C63A; 0.79(3) : 0.21(3) for F4..F6 / F4A..F6A.

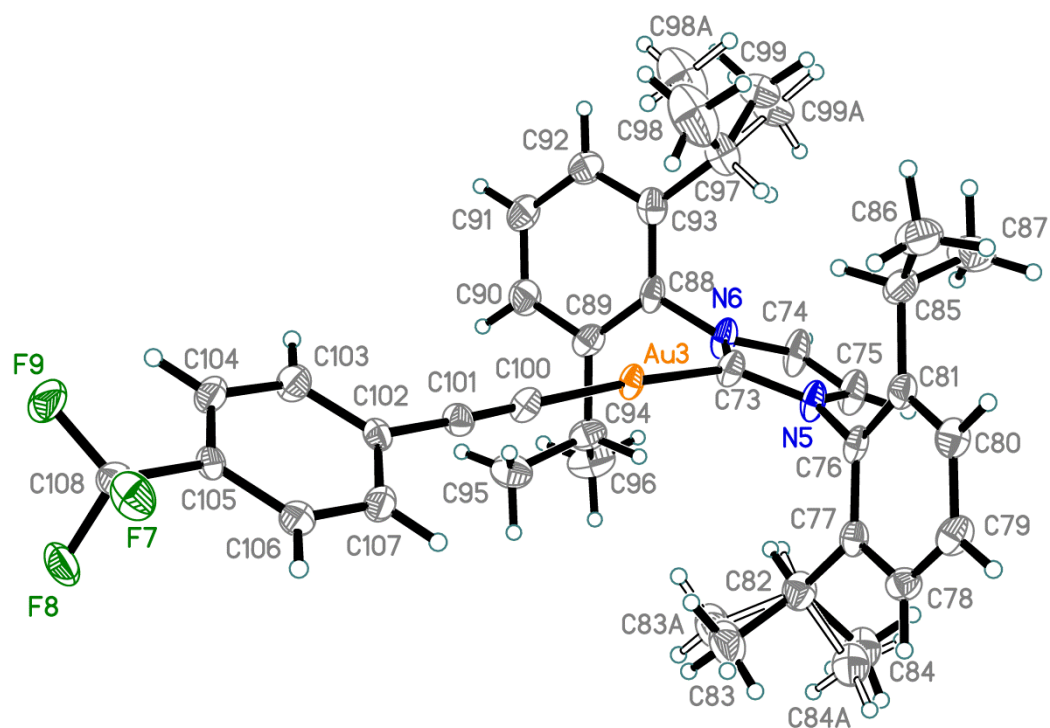

**Figure S59.** The 3<sup>rd</sup> molecule **3a** in **3a-II**. Thermal ellipsoids are shown at a 50% probability level. Hydrogen atoms are drawn as fixed-size spheres. The disorder ratios for groups of atoms are 0.30(8) : 0.70(8) for C83, C84 / C83A, C84A; 0.56(2) : 0.44(2) for C98, C99 / C98A, C99A.

**Table S10.** Selected bond distances (Å) for **3a-II**.

|         |          |          |           |           |           |
|---------|----------|----------|-----------|-----------|-----------|
| Au1-C1  | 2.004(3) | C13-C15  | 1.525(5)  | C30-C35A  | 1.393(17) |
| Au1-C28 | 1.975(3) | C13-C14  | 1.536(5)  | C30-C31   | 1.395(6)  |
| N1-C1   | 1.359(4) | C16-C17  | 1.397(4)  | C31-C32   | 1.386(6)  |
| N1-C3   | 1.378(4) | C16-C21  | 1.397(5)  | C32-C33   | 1.373(6)  |
| N1-C4   | 1.447(4) | C17-C18  | 1.389(5)  | C33-C34   | 1.390(6)  |
| N2-C1   | 1.354(4) | C17-C22  | 1.527(4)  | C33-C36   | 1.487(5)  |
| N2-C2   | 1.380(4) | C18-C19  | 1.379(5)  | C34-C35   | 1.379(6)  |
| N2-C16  | 1.449(4) | C19-C20  | 1.383(5)  | C36-F1    | 1.336(5)  |
| C2-C3   | 1.349(5) | C20-C21  | 1.394(5)  | C36-F3    | 1.344(5)  |
| C4-C5   | 1.392(5) | C21-C25  | 1.516(5)  | C36-F2    | 1.355(5)  |
| C4-C9   | 1.399(5) | C22-C23  | 1.526(5)  | C31A-C32A | 1.378(17) |
| C5-C6   | 1.392(5) | C22-C24  | 1.535(5)  | C32A-C33A | 1.379(17) |
| C5-C10  | 1.522(5) | C25-C26  | 1.529(5)  | C33A-C34A | 1.384(17) |
| C6-C7   | 1.380(5) | C25-C27  | 1.531(5)  | C33A-C36A | 1.487(19) |
| C7-C8   | 1.382(5) | C28-C29  | 1.212(5)  | C34A-C35A | 1.380(17) |
| C8-C9   | 1.390(5) | C29-C30  | 1.432(5)  | C36A-F1A  | 1.337(15) |
| C9-C13  | 1.517(5) | C30-C35  | 1.380(5)  | C36A-F3A  | 1.342(15) |
| C10-C12 | 1.524(5) | C30-C31A | 1.384(16) | C36A-F2A  | 1.343(15) |
| C10-C11 | 1.532(6) |          |           |           |           |

|          |          |          |           |           |           |
|----------|----------|----------|-----------|-----------|-----------|
| Au2-C37  | 2.008(3) | C46-C47  | 1.534(5)  | C61-C63A  | 1.492(10) |
| Au2-C64  | 1.975(3) | C49-C50  | 1.531(6)  | C61-C63   | 1.540(10) |
| N3-C37   | 1.359(4) | C49-C51  | 1.537(6)  | C61-C62A  | 1.637(9)  |
| N3-C39   | 1.379(4) | C49-C51A | 1.545(16) | C64-C65   | 1.216(5)  |
| N3-C40   | 1.444(4) | C49-C50A | 1.560(16) | C65-C66   | 1.432(5)  |
| N4-C37   | 1.356(4) | C52-C53  | 1.386(5)  | C66-C71   | 1.387(5)  |
| N4-C38   | 1.383(4) | C52-C57  | 1.399(5)  | C66-C67   | 1.392(5)  |
| N4-C52   | 1.446(4) | C53-C54  | 1.395(5)  | C67-C68   | 1.387(5)  |
| C38-C39  | 1.351(5) | C53-C58  | 1.520(5)  | C68-C69   | 1.378(5)  |
| C40-C41  | 1.392(5) | C54-C55  | 1.377(5)  | C69-C70   | 1.369(5)  |
| C40-C45  | 1.402(5) | C55-C56  | 1.382(5)  | C69-C72   | 1.507(5)  |
| C41-C42  | 1.391(5) | C56-C57  | 1.382(5)  | C70-C71   | 1.380(5)  |
| C41-C46  | 1.521(5) | C57-C61  | 1.512(5)  | C72-F4A   | 1.329(14) |
| C42-C43  | 1.383(5) | C58-C60A | 1.515(15) | C72-F5    | 1.347(6)  |
| C43-C44  | 1.386(5) | C58-C59A | 1.525(16) | C72-F6    | 1.349(5)  |
| C44-C45  | 1.392(5) | C58-C60  | 1.530(6)  | C72-F4    | 1.351(5)  |
| C45-C49  | 1.525(5) | C58-C59  | 1.533(7)  | C72-F6A   | 1.361(12) |
| C46-C48  | 1.529(5) | C61-C62  | 1.466(8)  | C72-F5A   | 1.369(14) |
| Au3-C73  | 2.003(3) | C82-C84  | 1.529(14) | C97-C98   | 1.517(9)  |
| Au3-C100 | 1.974(4) | C82-C84A | 1.531(8)  | C97-C99   | 1.519(11) |
| N5-C73   | 1.356(4) | C82-C83  | 1.532(15) | C97-C99A  | 1.539(12) |
| N5-C75   | 1.382(4) | C82-C83A | 1.538(8)  | C97-C98A  | 1.579(12) |
| N5-C76   | 1.445(4) | C85-C87  | 1.530(5)  | C100-C101 | 1.217(5)  |
| N6-C73   | 1.356(4) | C85-C86  | 1.543(6)  | C101-C102 | 1.431(5)  |
| N6-C74   | 1.379(4) | C88-C89  | 1.396(5)  | C102-C103 | 1.384(5)  |
| N6-C88   | 1.448(4) | C88-C93  | 1.402(5)  | C102-C107 | 1.399(5)  |
| C74-C75  | 1.351(5) | C89-C90  | 1.392(5)  | C103-C104 | 1.382(5)  |
| C76-C77  | 1.395(5) | C89-C94  | 1.528(5)  | C104-C105 | 1.380(5)  |
| C76-C81  | 1.404(5) | C90-C91  | 1.383(5)  | C105-C106 | 1.380(5)  |
| C77-C78  | 1.389(5) | C91-C92  | 1.389(5)  | C105-C108 | 1.492(5)  |
| C77-C82  | 1.524(5) | C92-C93  | 1.382(5)  | C106-C107 | 1.377(5)  |
| C78-C79  | 1.382(5) | C93-C97  | 1.520(5)  | C108-F9   | 1.338(4)  |
| C79-C80  | 1.379(5) | C94-C95  | 1.528(5)  | C108-F7   | 1.347(4)  |
| C80-C81  | 1.390(5) | C94-C96  | 1.533(5)  | C108-F8   | 1.359(4)  |
| C81-C85  | 1.521(5) |          |           |           |           |

**Table S11.** Selected bond angles (°) for **3a-II**.

|             |            |               |           |                |          |
|-------------|------------|---------------|-----------|----------------|----------|
| C28-Au1-C1  | 178.27(14) | C9-C13-C14    | 110.7(3)  | C31-C30-C29    | 119.8(4) |
| C1-N1-C3    | 110.8(3)   | C15-C13-C14   | 110.3(3)  | C32-C31-C30    | 120.2(6) |
| C1-N1-C4    | 125.4(3)   | C17-C16-C21   | 123.3(3)  | C33-C32-C31    | 120.4(7) |
| C3-N1-C4    | 123.5(3)   | C17-C16-N2    | 118.3(3)  | C32-C33-C34    | 120.0(7) |
| C1-N2-C2    | 111.4(3)   | C21-C16-N2    | 118.3(3)  | C32-C33-C36    | 121.8(6) |
| C1-N2-C16   | 126.1(3)   | C18-C17-C16   | 117.1(3)  | C34-C33-C36    | 118.2(6) |
| C2-N2-C16   | 122.4(3)   | C18-C17-C22   | 120.3(3)  | C35-C34-C33    | 119.3(8) |
| N2-C1-N1    | 104.4(3)   | C16-C17-C22   | 122.6(3)  | C34-C35-C30    | 121.5(8) |
| N2-C1-Au1   | 128.3(2)   | C19-C18-C17   | 121.2(3)  | F1-C36-F3      | 106.9(4) |
| N1-C1-Au1   | 127.1(2)   | C18-C19-C20   | 120.5(3)  | F1-C36-F2      | 106.4(4) |
| C3-C2-N2    | 106.3(3)   | C19-C20-C21   | 120.8(3)  | F3-C36-F2      | 104.0(4) |
| C2-C3-N1    | 107.1(3)   | C20-C21-C16   | 117.1(3)  | F1-C36-C33     | 112.8(5) |
| C5-C4-C9    | 123.5(3)   | C20-C21-C25   | 120.5(3)  | F3-C36-C33     | 113.4(5) |
| C5-C4-N1    | 118.4(3)   | C16-C21-C25   | 122.4(3)  | F2-C36-C33     | 112.7(6) |
| C9-C4-N1    | 118.0(3)   | C23-C22-C17   | 112.1(3)  | C32A-C31A-C30  | 128(5)   |
| C6-C5-C4    | 117.0(3)   | C23-C22-C24   | 109.7(3)  | C31A-C32A-C33A | 117(5)   |
| C6-C5-C10   | 119.6(3)   | C17-C22-C24   | 110.6(3)  | C32A-C33A-C34A | 113(5)   |
| C4-C5-C10   | 123.4(3)   | C21-C25-C26   | 110.4(3)  | C32A-C33A-C36A | 112(4)   |
| C7-C6-C5    | 121.1(3)   | C21-C25-C27   | 111.4(3)  | C34A-C33A-C36A | 134(5)   |
| C6-C7-C8    | 120.3(3)   | C26-C25-C27   | 110.5(3)  | C35A-C34A-C33A | 128(6)   |
| C7-C8-C9    | 121.2(3)   | C29-C28-Au1   | 178.1(3)  | C34A-C35A-C30  | 117(5)   |
| C8-C9-C4    | 116.9(3)   | C28-C29-C30   | 177.7(4)  | F1A-C36A-F3A   | 108(2)   |
| C8-C9-C13   | 120.0(3)   | C31A-C30-C35A | 114(3)    | F1A-C36A-F2A   | 107(2)   |
| C4-C9-C13   | 123.2(3)   | C35-C30-C31   | 118.6(5)  | F3A-C36A-F2A   | 108(2)   |
| C5-C10-C12  | 111.3(3)   | C35-C30-C29   | 121.5(4)  | F1A-C36A-C33A  | 115(3)   |
| C5-C10-C11  | 111.4(3)   | C31A-C30-C29  | 128(2)    | F3A-C36A-C33A  | 110(4)   |
| C12-C10-C11 | 110.1(3)   | C35A-C30-C29  | 118(3)    | F2A-C36A-C33A  | 110(4)   |
| C9-C13-C15  | 110.6(3)   |               |           |                |          |
| C64-Au2-C37 | 175.42(14) | C45-C49-C50   | 110.1(4)  | C57-C61-C63    | 114.1(6) |
| C37-N3-C39  | 111.2(3)   | C45-C49-C51   | 112.4(5)  | C63A-C61-C62A  | 106.4(6) |
| C37-N3-C40  | 124.1(3)   | C50-C49-C51   | 111.0(5)  | C57-C61-C62A   | 105.9(4) |
| C39-N3-C40  | 124.5(3)   | C45-C49-C51A  | 109(4)    | C65-C64-Au2    | 178.2(3) |
| C37-N4-C38  | 111.1(3)   | C45-C49-C50A  | 102.3(18) | C64-C65-C66    | 178.1(4) |
| C37-N4-C52  | 125.9(3)   | C51A-C49-C50A | 107(2)    | C71-C66-C67    | 118.4(3) |
| C38-N4-C52  | 122.9(3)   | C53-C52-C57   | 123.0(3)  | C71-C66-C65    | 121.0(3) |
| N4-C37-N3   | 104.3(3)   | C53-C52-N4    | 118.2(3)  | C67-C66-C65    | 120.6(3) |
| N4-C37-Au2  | 129.5(2)   | C57-C52-N4    | 118.8(3)  | C68-C67-C66    | 120.7(4) |
| N3-C37-Au2  | 125.6(2)   | C52-C53-C54   | 117.3(3)  | C69-C68-C67    | 119.5(3) |
| C39-C38-N4  | 106.7(3)   | C52-C53-C58   | 122.7(3)  | C70-C69-C68    | 120.6(3) |

|              |            |               |           |                |           |
|--------------|------------|---------------|-----------|----------------|-----------|
| C38-C39-N3   | 106.7(3)   | C54-C53-C58   | 119.9(3)  | C70-C69-C72    | 119.7(3)  |
| C41-C40-C45  | 123.2(3)   | C55-C54-C53   | 120.9(3)  | C68-C69-C72    | 119.7(3)  |
| C41-C40-N3   | 118.5(3)   | C54-C55-C56   | 120.3(3)  | C69-C70-C71    | 119.9(3)  |
| C45-C40-N3   | 118.3(3)   | C55-C56-C57   | 121.0(3)  | C70-C71-C66    | 120.9(3)  |
| C42-C41-C40  | 116.9(3)   | C56-C57-C52   | 117.4(3)  | F5-C72-F6      | 108.0(4)  |
| C42-C41-C46  | 119.8(3)   | C56-C57-C61   | 120.3(3)  | F5-C72-F4      | 105.4(5)  |
| C40-C41-C46  | 123.2(3)   | C52-C57-C61   | 122.3(3)  | F6-C72-F4      | 105.3(4)  |
| C43-C42-C41  | 121.6(3)   | C60A-C58-C53  | 111.9(17) | F4A-C72-F6A    | 111.9(15) |
| C42-C43-C44  | 120.2(4)   | C60A-C58-C59A | 114.0(19) | F4A-C72-F5A    | 105.3(19) |
| C43-C44-C45  | 120.6(3)   | C53-C58-C59A  | 108(2)    | F6A-C72-F5A    | 98.7(15)  |
| C44-C45-C40  | 117.6(3)   | C53-C58-C60   | 112.5(4)  | F4A-C72-C69    | 120.0(19) |
| C44-C45-C49  | 120.8(3)   | C53-C58-C59   | 109.1(5)  | F5-C72-C69     | 114.2(5)  |
| C40-C45-C49  | 121.6(3)   | C60-C58-C59   | 112.0(4)  | F6-C72-C69     | 112.3(3)  |
| C41-C46-C48  | 110.3(3)   | C62-C61-C57   | 113.6(5)  | F4-C72-C69     | 111.1(5)  |
| C41-C46-C47  | 111.1(3)   | C63A-C61-C57  | 112.4(6)  | F6A-C72-C69    | 112.9(9)  |
| C48-C46-C47  | 111.4(3)   | C62-C61-C63   | 113.6(6)  | F5A-C72-C69    | 105.1(18) |
| C100-Au3-C73 | 175.60(14) | C77-C82-C84   | 108(2)    | C98-C97-C99    | 115.1(10) |
| C73-N5-C75   | 111.2(3)   | C77-C82-C84A  | 113.9(10) | C98-C97-C93    | 110.0(6)  |
| C73-N5-C76   | 125.9(3)   | C77-C82-C83   | 108(3)    | C99-C97-C93    | 113.1(15) |
| C75-N5-C76   | 122.9(3)   | C84-C82-C83   | 113.6(19) | C93-C97-C99A   | 111(2)    |
| C73-N6-C74   | 111.3(3)   | C77-C82-C83A  | 109.8(10) | C93-C97-C98A   | 109.5(8)  |
| C73-N6-C88   | 124.8(3)   | C84A-C82-C83A | 110.9(7)  | C99A-C97-C98A  | 105.4(12) |
| C74-N6-C88   | 123.9(3)   | C81-C85-C87   | 111.0(3)  | C101-C100-Au3  | 179.1(3)  |
| N6-C73-N5    | 104.3(3)   | C81-C85-C86   | 112.1(3)  | C100-C101-C102 | 177.3(4)  |
| N6-C73-Au3   | 127.1(2)   | C87-C85-C86   | 109.1(3)  | C103-C102-C107 | 117.8(3)  |
| N5-C73-Au3   | 127.9(2)   | C89-C88-C93   | 123.0(3)  | C103-C102-C101 | 121.5(3)  |
| C75-C74-N6   | 106.6(3)   | C89-C88-N6    | 118.6(3)  | C107-C102-C101 | 120.8(3)  |
| C74-C75-N5   | 106.6(3)   | C93-C88-N6    | 118.4(3)  | C104-C103-C102 | 121.7(3)  |
| C77-C76-C81  | 123.1(3)   | C90-C89-C88   | 117.1(3)  | C105-C104-C103 | 119.4(3)  |
| C77-C76-N5   | 117.9(3)   | C90-C89-C94   | 119.5(3)  | C104-C105-C106 | 120.2(3)  |
| C81-C76-N5   | 118.9(3)   | C88-C89-C94   | 123.4(3)  | C104-C105-C108 | 120.2(3)  |
| C78-C77-C76  | 117.3(3)   | C91-C90-C89   | 121.2(4)  | C106-C105-C108 | 119.6(3)  |
| C78-C77-C82  | 119.7(3)   | C90-C91-C92   | 120.2(4)  | C107-C106-C105 | 119.9(3)  |
| C76-C77-C82  | 122.9(3)   | C93-C92-C91   | 120.9(4)  | C106-C107-C102 | 121.0(3)  |
| C79-C78-C77  | 121.0(3)   | C92-C93-C88   | 117.6(3)  | F9-C108-F7     | 106.6(3)  |
| C80-C79-C78  | 120.5(3)   | C92-C93-C97   | 120.0(4)  | F9-C108-F8     | 105.8(3)  |
| C79-C80-C81  | 121.1(3)   | C88-C93-C97   | 122.4(3)  | F7-C108-F8     | 105.2(3)  |
| C80-C81-C76  | 116.9(3)   | C95-C94-C89   | 110.8(3)  | F9-C108-C105   | 113.5(3)  |
| C80-C81-C85  | 120.9(3)   | C95-C94-C96   | 111.4(3)  | F7-C108-C105   | 113.0(3)  |
| C76-C81-C85  | 122.2(3)   | C89-C94-C96   | 110.2(3)  | F8-C108-C105   | 112.1(3)  |

**Table S12.** Torsion angles (°) for **3a-II**.

|               |           |                     |           |
|---------------|-----------|---------------------|-----------|
| C2-N2-C1-N1   | -0.8(4)   | C17-C18-C19-C20     | -0.8(6)   |
| C16-N2-C1-N1  | -175.9(3) | C18-C19-C20-C21     | 1.1(6)    |
| C2-N2-C1-Au1  | 174.1(3)  | C19-C20-C21-C16     | -0.4(5)   |
| C16-N2-C1-Au1 | -1.0(5)   | C19-C20-C21-C25     | -179.3(3) |
| C3-N1-C1-N2   | 0.5(4)    | C17-C16-C21-C20     | -0.8(5)   |
| C4-N1-C1-N2   | 174.5(3)  | N2-C16-C21-C20      | 175.2(3)  |
| C3-N1-C1-Au1  | -174.4(3) | C17-C16-C21-C25     | 178.1(3)  |
| C4-N1-C1-Au1  | -0.5(5)   | N2-C16-C21-C25      | -5.8(5)   |
| C1-N2-C2-C3   | 0.7(4)    | C18-C17-C22-C23     | -38.4(5)  |
| C16-N2-C2-C3  | 176.0(3)  | C16-C17-C22-C23     | 142.9(3)  |
| N2-C2-C3-N1   | -0.3(4)   | C18-C17-C22-C24     | 84.4(4)   |
| C1-N1-C3-C2   | -0.1(4)   | C16-C17-C22-C24     | -94.3(4)  |
| C4-N1-C3-C2   | -174.2(3) | C20-C21-C25-C26     | 70.3(4)   |
| C1-N1-C4-C5   | 103.1(4)  | C16-C21-C25-C26     | -108.6(4) |
| C3-N1-C4-C5   | -83.7(4)  | C20-C21-C25-C27     | -52.8(5)  |
| C1-N1-C4-C9   | -79.2(4)  | C16-C21-C25-C27     | 128.3(4)  |
| C3-N1-C4-C9   | 94.0(4)   | C35-C30-C31-C32     | -0.29(19) |
| C9-C4-C5-C6   | -0.9(5)   | C29-C30-C31-C32     | 179.6(3)  |
| N1-C4-C5-C6   | 176.6(3)  | C30-C31-C32-C33     | 0.1(2)    |
| C9-C4-C5-C10  | 179.0(3)  | C31-C32-C33-C34     | -0.2(5)   |
| N1-C4-C5-C10  | -3.5(5)   | C31-C32-C33-C36     | 179.5(5)  |
| C4-C5-C6-C7   | 0.2(5)    | C32-C33-C34-C35     | 0.5(6)    |
| C10-C5-C6-C7  | -179.7(3) | C36-C33-C34-C35     | -179.1(5) |
| C5-C6-C7-C8   | 0.4(6)    | C33-C34-C35-C30     | -0.7(5)   |
| C6-C7-C8-C9   | -0.4(6)   | C31-C30-C35-C34     | 0.6(4)    |
| C7-C8-C9-C4   | -0.3(5)   | C29-C30-C35-C34     | -179.3(3) |
| C7-C8-C9-C13  | -179.3(3) | C32-C33-C36-F1      | 5.4(7)    |
| C5-C4-C9-C8   | 1.0(5)    | C34-C33-C36-F1      | -174.9(4) |
| N1-C4-C9-C8   | -176.6(3) | C32-C33-C36-F3      | -116.2(5) |
| C5-C4-C9-C13  | 179.9(3)  | C34-C33-C36-F3      | 63.4(6)   |
| N1-C4-C9-C13  | 2.4(5)    | C32-C33-C36-F2      | 125.9(5)  |
| C6-C5-C10-C12 | -77.9(5)  | C34-C33-C36-F2      | -54.4(7)  |
| C4-C5-C10-C12 | 102.2(4)  | C35A-C30-C31A-C32A  | 0.0(2)    |
| C6-C5-C10-C11 | 45.4(5)   | C29-C30-C31A-C32A   | 179.8(4)  |
| C4-C5-C10-C11 | -134.5(4) | C30-C31A-C32A-C33A  | -10(3)    |
| C8-C9-C13-C15 | 62.9(5)   | C31A-C32A-C33A-C34A | 19(5)     |
| C4-C9-C13-C15 | -116.0(4) | C31A-C32A-C33A-C36A | -175(3)   |
| C8-C9-C13-C14 | -59.7(4)  | C32A-C33A-C34A-C35A | -21(6)    |
| C4-C9-C13-C14 | 121.4(4)  | C36A-C33A-C34A-C35A | 176(4)    |

|                 |           |                    |           |
|-----------------|-----------|--------------------|-----------|
| C1-N2-C16-C17   | -95.6(4)  | C33A-C34A-C35A-C30 | 12(4)     |
| C2-N2-C16-C17   | 89.7(4)   | C31A-C30-C35A-C34A | -0.1(5)   |
| C1-N2-C16-C21   | 88.1(4)   | C29-C30-C35A-C34A  | -179.9(5) |
| C2-N2-C16-C21   | -86.6(4)  | C32A-C33A-C36A-F1A | 11(6)     |
| C21-C16-C17-C18 | 1.2(5)    | C34A-C33A-C36A-F1A | 174(5)    |
| N2-C16-C17-C18  | -174.9(3) | C32A-C33A-C36A-F3A | -110(4)   |
| C21-C16-C17-C22 | 179.9(3)  | C34A-C33A-C36A-F3A | 52(7)     |
| N2-C16-C17-C22  | 3.9(5)    | C32A-C33A-C36A-F2A | 131(4)    |
| C16-C17-C18-C19 | -0.4(5)   | C34A-C33A-C36A-F2A | -66(7)    |
| C22-C17-C18-C19 | -179.1(3) |                    |           |
| C38-N4-C37-N3   | 1.5(4)    | N4-C52-C53-C58     | 7.9(5)    |
| C52-N4-C37-N3   | -175.3(3) | C52-C53-C54-C55    | -0.4(5)   |
| C38-N4-C37-Au2  | -169.6(3) | C58-C53-C54-C55    | 176.1(3)  |
| C52-N4-C37-Au2  | 13.5(5)   | C53-C54-C55-C56    | -1.3(6)   |
| C39-N3-C37-N4   | -1.5(4)   | C54-C55-C56-C57    | 1.6(6)    |
| C40-N3-C37-N4   | 173.7(3)  | C55-C56-C57-C52    | -0.2(6)   |
| C39-N3-C37-Au2  | 170.2(3)  | C55-C56-C57-C61    | -179.6(4) |
| C40-N3-C37-Au2  | -14.7(5)  | C53-C52-C57-C56    | -1.6(5)   |
| C37-N4-C38-C39  | -1.0(4)   | N4-C52-C57-C56     | 176.1(3)  |
| C52-N4-C38-C39  | 175.9(3)  | C53-C52-C57-C61    | 177.8(3)  |
| N4-C38-C39-N3   | 0.1(4)    | N4-C52-C57-C61     | -4.5(5)   |
| C37-N3-C39-C38  | 0.9(5)    | C52-C53-C58-C60A   | -114(2)   |
| C40-N3-C39-C38  | -174.2(3) | C54-C53-C58-C60A   | 70(2)     |
| C37-N3-C40-C41  | 88.6(4)   | C52-C53-C58-C59A   | 119(3)    |
| C39-N3-C40-C41  | -97.0(4)  | C54-C53-C58-C59A   | -57(3)    |
| C37-N3-C40-C45  | -91.3(4)  | C52-C53-C58-C60    | -134.4(8) |
| C39-N3-C40-C45  | 83.2(4)   | C54-C53-C58-C60    | 49.3(8)   |
| C45-C40-C41-C42 | -1.8(5)   | C52-C53-C58-C59    | 100.7(8)  |
| N3-C40-C41-C42  | 178.3(3)  | C54-C53-C58-C59    | -75.6(8)  |
| C45-C40-C41-C46 | 179.0(3)  | C56-C57-C61-C62    | 76.7(7)   |
| N3-C40-C41-C46  | -0.8(5)   | C52-C57-C61-C62    | -102.7(6) |
| C40-C41-C42-C43 | 0.5(5)    | C56-C57-C61-C63A   | -84.7(7)  |
| C46-C41-C42-C43 | 179.7(3)  | C52-C57-C61-C63A   | 95.9(7)   |
| C41-C42-C43-C44 | 0.7(6)    | C56-C57-C61-C63    | -55.7(7)  |
| C42-C43-C44-C45 | -0.7(6)   | C52-C57-C61-C63    | 124.9(6)  |
| C43-C44-C45-C40 | -0.5(6)   | C56-C57-C61-C62A   | 31.0(6)   |
| C43-C44-C45-C49 | 177.0(4)  | C52-C57-C61-C62A   | -148.4(5) |
| C41-C40-C45-C44 | 1.8(5)    | C71-C66-C67-C68    | -1.0(6)   |
| N3-C40-C45-C44  | -178.3(3) | C65-C66-C67-C68    | 178.4(4)  |
| C41-C40-C45-C49 | -175.7(3) | C66-C67-C68-C69    | 0.6(6)    |



|                  |           |                 |           |
|------------------|-----------|-----------------|-----------|
| N3-C40-C45-C49   | 4.1(5)    | C67-C68-C69-C70 | 0.1(6)    |
| C42-C41-C46-C48  | -67.2(5)  | C67-C68-C69-C72 | 179.6(4)  |
| C40-C41-C46-C48  | 111.9(4)  | C68-C69-C70-C71 | -0.4(6)   |
| C42-C41-C46-C47  | 56.7(4)   | C72-C69-C70-C71 | -179.9(4) |
| C40-C41-C46-C47  | -124.1(4) | C69-C70-C71-C66 | 0.0(6)    |
| C44-C45-C49-C50  | -70.3(6)  | C67-C66-C71-C70 | 0.7(6)    |
| C40-C45-C49-C50  | 107.2(6)  | C65-C66-C71-C70 | -178.7(4) |
| C44-C45-C49-C51  | 54.0(6)   | C70-C69-C72-F4A | -138(2)   |
| C40-C45-C49-C51  | -128.5(5) | C68-C69-C72-F4A | 42(2)     |
| C44-C45-C49-C51A | 71(3)     | C70-C69-C72-F5  | 94.8(6)   |
| C40-C45-C49-C51A | -112(3)   | C68-C69-C72-F5  | -84.7(6)  |
| C44-C45-C49-C50A | -43(3)    | C70-C69-C72-F6  | -28.5(7)  |
| C40-C45-C49-C50A | 135(3)    | C68-C69-C72-F6  | 152.0(6)  |
| C37-N4-C52-C53   | -98.1(4)  | C70-C69-C72-F4  | -146.2(6) |
| C38-N4-C52-C53   | 85.4(4)   | C68-C69-C72-F4  | 34.3(6)   |
| C37-N4-C52-C57   | 84.1(4)   | C70-C69-C72-F6A | -3.0(15)  |
| C38-N4-C52-C57   | -92.4(4)  | C68-C69-C72-F6A | 177.5(14) |
| C57-C52-C53-C54  | 1.9(5)    | C70-C69-C72-F5A | 103.5(17) |
| N4-C52-C53-C54   | -175.8(3) | C68-C69-C72-F5A | -76.0(17) |
| C57-C52-C53-C58  | -174.5(3) |                 |           |
| C74-N6-C73-N5    | 1.6(4)    | C73-N6-C88-C93  | 93.1(4)   |
| C88-N6-C73-N5    | -175.7(3) | C74-N6-C88-C93  | -83.8(5)  |
| C74-N6-C73-Au3   | -169.1(3) | C93-C88-C89-C90 | 0.5(5)    |
| C88-N6-C73-Au3   | 13.7(5)   | N6-C88-C89-C90  | -178.4(3) |
| C75-N5-C73-N6    | -2.0(4)   | C93-C88-C89-C94 | -179.5(3) |
| C76-N5-C73-N6    | -179.6(3) | N6-C88-C89-C94  | 1.5(5)    |
| C75-N5-C73-Au3   | 168.5(3)  | C88-C89-C90-C91 | 0.1(6)    |
| C76-N5-C73-Au3   | -9.0(5)   | C94-C89-C90-C91 | -179.8(4) |
| C73-N6-C74-C75   | -0.6(5)   | C89-C90-C91-C92 | -0.5(6)   |
| C88-N6-C74-C75   | 176.7(3)  | C90-C91-C92-C93 | 0.2(6)    |
| N6-C74-C75-N5    | -0.7(5)   | C91-C92-C93-C88 | 0.5(6)    |
| C73-N5-C75-C74   | 1.7(5)    | C91-C92-C93-C97 | -178.0(4) |
| C76-N5-C75-C74   | 179.4(3)  | C89-C88-C93-C92 | -0.8(5)   |
| C73-N5-C76-C77   | 95.8(4)   | N6-C88-C93-C92  | 178.2(3)  |
| C75-N5-C76-C77   | -81.5(4)  | C89-C88-C93-C97 | 177.6(3)  |
| C73-N5-C76-C81   | -86.4(4)  | N6-C88-C93-C97  | -3.4(5)   |
| C75-N5-C76-C81   | 96.3(4)   | C90-C89-C94-C95 | -61.3(5)  |
| C81-C76-C77-C78  | -2.6(5)   | C88-C89-C94-C95 | 118.7(4)  |
| N5-C76-C77-C78   | 175.1(3)  | C90-C89-C94-C96 | 62.4(5)   |
| C81-C76-C77-C82  | 174.4(3)  | C88-C89-C94-C96 | -117.5(4) |

|                  |            |                     |            |
|------------------|------------|---------------------|------------|
| N5-C76-C77-C82   | -7.9(5)    | C92-C93-C97-C98     | 75.9(10)   |
| C76-C77-C78-C79  | 0.5(5)     | C88-C93-C97-C98     | -102.5(10) |
| C82-C77-C78-C79  | -176.6(3)  | C92-C93-C97-C99     | -54.4(10)  |
| C77-C78-C79-C80  | 1.8(6)     | C88-C93-C97-C99     | 127.2(10)  |
| C78-C79-C80-C81  | -2.2(6)    | C92-C93-C97-C99A    | -69.9(13)  |
| C79-C80-C81-C76  | 0.2(5)     | C88-C93-C97-C99A    | 111.7(13)  |
| C79-C80-C81-C85  | -179.5(3)  | C92-C93-C97-C98A    | 46.1(10)   |
| C77-C76-C81-C80  | 2.2(5)     | C88-C93-C97-C98A    | -132.3(10) |
| N5-C76-C81-C80   | -175.5(3)  | C107-C102-C103-C104 | 0.9(5)     |
| C77-C76-C81-C85  | -178.0(3)  | C101-C102-C103-C104 | -178.3(3)  |
| N5-C76-C81-C85   | 4.3(5)     | C102-C103-C104-C105 | -0.3(6)    |
| C78-C77-C82-C84  | -62(2)     | C103-C104-C105-C106 | 0.0(5)     |
| C76-C77-C82-C84  | 121(2)     | C103-C104-C105-C108 | -179.7(3)  |
| C78-C77-C82-C84A | -50.9(13)  | C104-C105-C106-C107 | -0.4(5)    |
| C76-C77-C82-C84A | 132.2(13)  | C108-C105-C106-C107 | 179.3(3)   |
| C78-C77-C82-C83  | 61(2)      | C105-C106-C107-C102 | 1.0(5)     |
| C76-C77-C82-C83  | -116(2)    | C103-C102-C107-C106 | -1.3(5)    |
| C78-C77-C82-C83A | 74.2(14)   | C101-C102-C107-C106 | 177.9(3)   |
| C76-C77-C82-C83A | -102.7(14) | C104-C105-C108-F9   | -19.7(5)   |
| C80-C81-C85-C87  | 97.0(4)    | C106-C105-C108-F9   | 160.6(3)   |
| C76-C81-C85-C87  | -82.8(4)   | C104-C105-C108-F7   | -141.2(3)  |
| C80-C81-C85-C86  | -25.3(5)   | C106-C105-C108-F7   | 39.1(4)    |
| C76-C81-C85-C86  | 154.9(3)   | C104-C105-C108-F8   | 100.1(4)   |
| C73-N6-C88-C89   | -87.9(4)   | C106-C105-C108-F8   | -79.6(4)   |
| C74-N6-C88-C89   | 95.2(4)    |                     |            |

## The crystal structure of **3b**

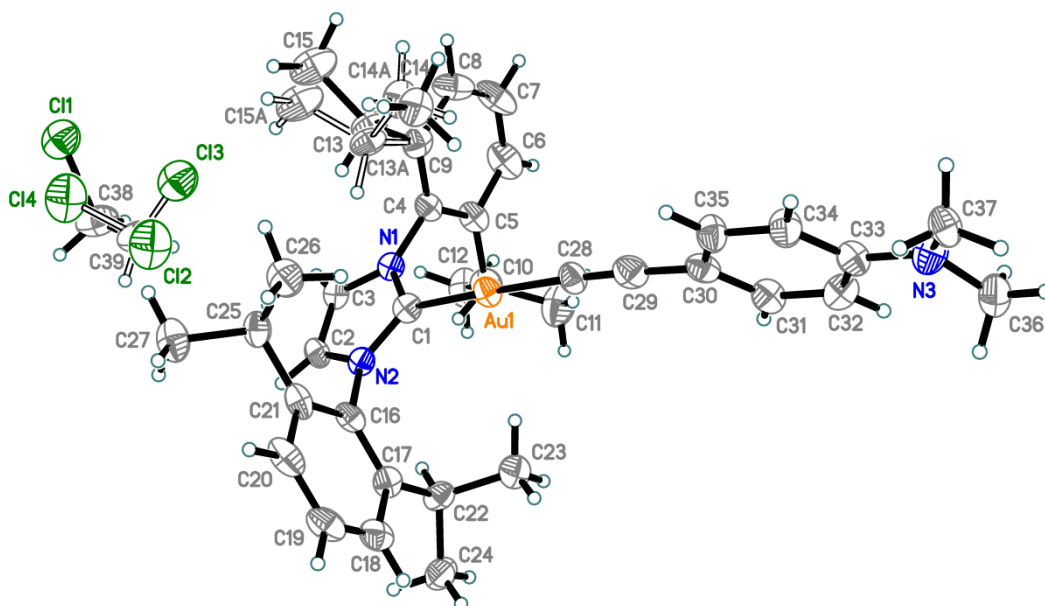

**Figure S60.** The crystal structure of **3b**. Thermal ellipsoids are shown at a 50% probability level. Hydrogen atoms are drawn as fixed-size spheres. The disorder ratios are 0.62(3) : 0.38(3) for atoms C13..C15 / C13A..C15A of the *iso*-propyl group and 0.557(4) : 0.443(4) for a non-coordinating dichloromethane molecule. Minor components of the disorders are drawn with open solid lines.

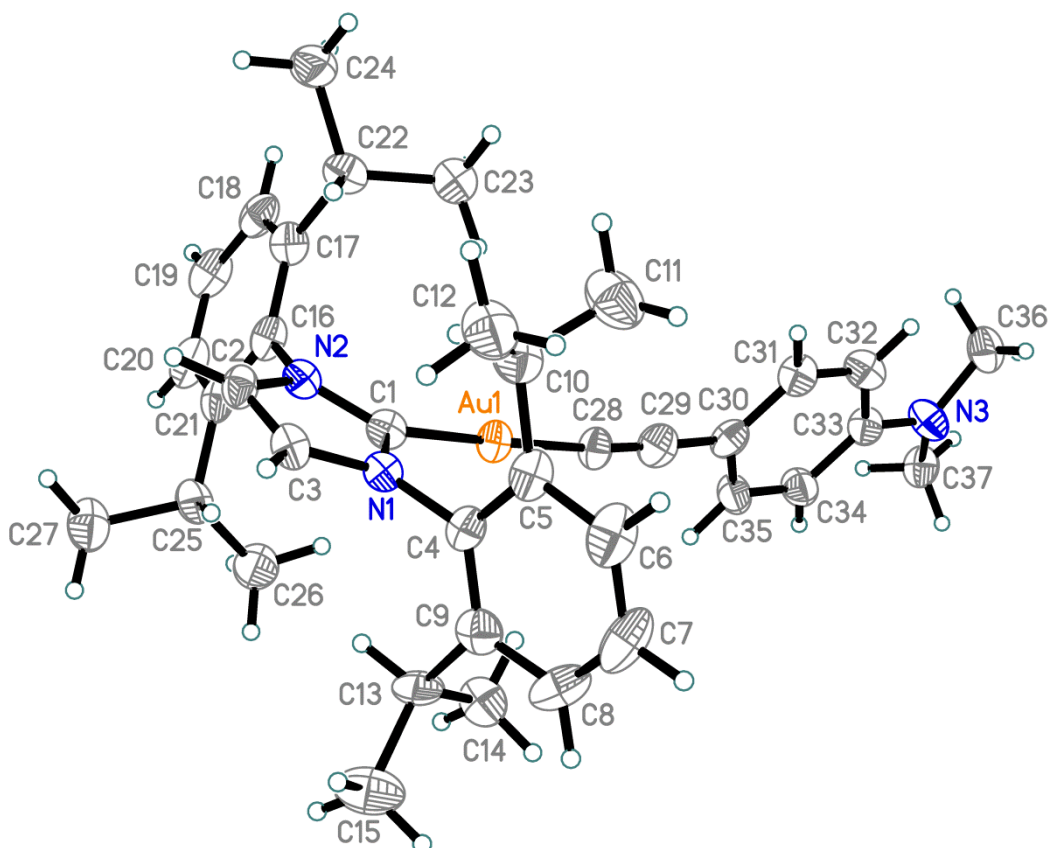

**Figure S61.** The structure of complex **3b**. Thermal ellipsoids are shown at a 50% probability level. Hydrogen atoms are drawn as fixed-size spheres. Disorder is omitted.

**Table S13.** Selected bond lengths (Å) for **3b**.

|         |           |           |           |         |           |
|---------|-----------|-----------|-----------|---------|-----------|
| Au1-C1  | 2.017(8)  | C6-C7     | 1.365(15) | C19-C20 | 1.383(14) |
| Au1-C28 | 2.004(8)  | C7-C8     | 1.369(15) | C20-C21 | 1.406(12) |
| N1-C1   | 1.370(11) | C8-C9     | 1.411(13) | C21-C25 | 1.507(13) |
| N1-C3   | 1.390(10) | C9-C13    | 1.528(14) | C22-C23 | 1.535(13) |
| N1-C4   | 1.443(10) | C9-C13A   | 1.528(14) | C22-C24 | 1.536(13) |
| N2-C1   | 1.334(10) | C10-C11   | 1.521(14) | C25-C27 | 1.523(12) |
| N2-C2   | 1.379(11) | C10-C12   | 1.540(13) | C25-C26 | 1.529(13) |
| N2-C16  | 1.476(10) | C13-C14   | 1.570(15) | C28-C29 | 1.193(12) |
| N3-C33  | 1.373(11) | C13-C15   | 1.571(15) | C29-C30 | 1.453(13) |
| N3-C36  | 1.425(13) | C13A-C14A | 1.53(3)   | C30-C35 | 1.391(12) |
| N3-C37  | 1.466(12) | C13A-C15A | 1.53(3)   | C30-C31 | 1.394(13) |
| C2-C3   | 1.352(12) | C16-C17   | 1.391(12) | C31-C32 | 1.378(13) |
| C4-C9   | 1.397(12) | C16-C21   | 1.401(12) | C32-C33 | 1.405(12) |
| C4-C5   | 1.398(12) | C17-C18   | 1.396(12) | C33-C34 | 1.399(13) |
| C5-C6   | 1.399(13) | C17-C22   | 1.535(12) | C34-C35 | 1.371(13) |
| C5-C10  | 1.508(13) | C18-C19   | 1.380(14) |         |           |

**Table S14.** Selected bond angles (°) for **3b**.

|            |          |                |           |             |           |
|------------|----------|----------------|-----------|-------------|-----------|
| C28-Au1-C1 | 178.3(3) | C7-C8-C9       | 120.9(9)  | C19-C20-C21 | 120.9(9)  |
| C1-N1-C3   | 111.1(7) | C4-C9-C8       | 116.3(9)  | C16-C21-C20 | 116.6(9)  |
| C1-N1-C4   | 125.5(7) | C4-C9-C13      | 126.7(12) | C16-C21-C25 | 122.5(8)  |
| C3-N1-C4   | 123.2(7) | C8-C9-C13      | 117.0(12) | C20-C21-C25 | 120.9(8)  |
| C1-N2-C2   | 112.3(7) | C4-C9-C13A     | 115.1(16) | C23-C22-C17 | 111.6(7)  |
| C1-N2-C16  | 123.8(7) | C8-C9-C13A     | 128.6(17) | C23-C22-C24 | 108.7(8)  |
| C2-N2-C16  | 123.0(7) | C5-C10-C11     | 110.0(8)  | C17-C22-C24 | 113.0(8)  |
| C33-N3-C36 | 120.7(8) | C5-C10-C12     | 112.8(8)  | C21-C25-C27 | 112.7(8)  |
| C33-N3-C37 | 120.7(7) | C11-C10-C12    | 111.8(8)  | C21-C25-C26 | 110.2(8)  |
| C36-N3-C37 | 115.5(8) | C9-C13-C14     | 110.0(18) | C27-C25-C26 | 110.9(7)  |
| N2-C1-N1   | 104.0(7) | C9-C13-C15     | 112.7(14) | C29-C28-Au1 | 172.6(8)  |
| N2-C1-Au1  | 129.0(6) | C14-C13-C15    | 113.1(16) | C28-C29-C30 | 177.5(10) |
| N1-C1-Au1  | 127.0(6) | C14A-C13A-C15A | 104(3)    | C35-C30-C31 | 116.6(8)  |
| C3-C2-N2   | 106.8(8) | C14A-C13A-C9   | 111(3)    | C35-C30-C29 | 122.8(8)  |
| C2-C3-N1   | 105.9(7) | C15A-C13A-C9   | 111(3)    | C31-C30-C29 | 120.6(8)  |
| C9-C4-C5   | 123.7(8) | C17-C16-C21    | 123.8(8)  | C32-C31-C30 | 122.0(8)  |
| C9-C4-N1   | 119.1(8) | C17-C16-N2     | 120.1(7)  | C31-C32-C33 | 121.1(9)  |
| C5-C4-N1   | 117.2(7) | C21-C16-N2     | 116.1(8)  | N3-C33-C34  | 122.3(8)  |
| C4-C5-C6   | 116.5(9) | C16-C17-C18    | 116.9(8)  | N3-C33-C32  | 121.0(8)  |

|           |          |             |          |             |          |
|-----------|----------|-------------|----------|-------------|----------|
| C4-C5-C10 | 122.3(8) | C16-C17-C22 | 122.5(7) | C34-C33-C32 | 116.6(8) |
| C6-C5-C10 | 121.2(8) | C18-C17-C22 | 120.6(8) | C35-C34-C33 | 121.6(9) |
| C7-C6-C5  | 121.2(9) | C19-C18-C17 | 121.3(9) | C34-C35-C30 | 122.1(9) |
| C6-C7-C8  | 121.2(9) | C18-C19-C20 | 120.5(8) |             |          |

**Table S15.** Torsion angles (°) for **3b**.

|               |            |                 |           |
|---------------|------------|-----------------|-----------|
| C2-N2-C1-N1   | -1.2(9)    | C8-C9-C13A-C14A | -46(4)    |
| C16-N2-C1-N1  | -170.1(7)  | C4-C9-C13A-C15A | -113(3)   |
| C2-N2-C1-Au1  | -179.8(6)  | C8-C9-C13A-C15A | 69(4)     |
| C16-N2-C1-Au1 | 11.4(12)   | C1-N2-C16-C17   | -94.2(10) |
| C3-N1-C1-N2   | 1.2(9)     | C2-N2-C16-C17   | 98.1(10)  |
| C4-N1-C1-N2   | -173.8(7)  | C1-N2-C16-C21   | 86.2(10)  |
| C3-N1-C1-Au1  | 179.8(6)   | C2-N2-C16-C21   | -81.5(10) |
| C4-N1-C1-Au1  | 4.8(12)    | C21-C16-C17-C18 | -2.3(13)  |
| C1-N2-C2-C3   | 0.8(10)    | N2-C16-C17-C18  | 178.2(7)  |
| C16-N2-C2-C3  | 169.8(7)   | C21-C16-C17-C22 | 178.6(8)  |
| N2-C2-C3-N1   | 0.0(9)     | N2-C16-C17-C22  | -0.9(12)  |
| C1-N1-C3-C2   | -0.7(9)    | C16-C17-C18-C19 | 2.2(13)   |
| C4-N1-C3-C2   | 174.4(7)   | C22-C17-C18-C19 | -178.7(8) |
| C1-N1-C4-C9   | -81.8(11)  | C17-C18-C19-C20 | -0.7(13)  |
| C3-N1-C4-C9   | 103.7(9)   | C18-C19-C20-C21 | -0.9(14)  |
| C1-N1-C4-C5   | 98.5(9)    | C17-C16-C21-C20 | 0.8(12)   |
| C3-N1-C4-C5   | -76.0(10)  | N2-C16-C21-C20  | -179.7(7) |
| C9-C4-C5-C6   | -3.8(13)   | C17-C16-C21-C25 | -179.0(8) |
| N1-C4-C5-C6   | 175.9(8)   | N2-C16-C21-C25  | 0.6(12)   |
| C9-C4-C5-C10  | 177.0(8)   | C19-C20-C21-C16 | 0.9(12)   |
| N1-C4-C5-C10  | -3.3(12)   | C19-C20-C21-C25 | -179.3(8) |
| C4-C5-C6-C7   | 3.0(14)    | C16-C17-C22-C23 | 89.3(10)  |
| C10-C5-C6-C7  | -177.8(9)  | C18-C17-C22-C23 | -89.8(10) |
| C5-C6-C7-C8   | -1.6(16)   | C16-C17-C22-C24 | -147.8(8) |
| C6-C7-C8-C9   | 0.8(16)    | C18-C17-C22-C24 | 33.2(11)  |
| C5-C4-C9-C8   | 3.1(13)    | C16-C21-C25-C27 | 128.1(9)  |
| N1-C4-C9-C8   | -176.6(8)  | C20-C21-C25-C27 | -51.7(11) |
| C5-C4-C9-C13  | -176.6(13) | C16-C21-C25-C26 | -107.5(9) |
| N1-C4-C9-C13  | 3.7(16)    | C20-C21-C25-C26 | 72.8(10)  |
| C5-C4-C9-C13A | -175(2)    | C35-C30-C31-C32 | -0.4(13)  |
| N1-C4-C9-C13A | 6(2)       | C29-C30-C31-C32 | 178.1(8)  |
| C7-C8-C9-C4   | -1.5(13)   | C30-C31-C32-C33 | 1.2(14)   |
| C7-C8-C9-C13  | 178.3(12)  | C36-N3-C33-C34  | 169.8(9)  |

|                 |            |                 |           |
|-----------------|------------|-----------------|-----------|
| C7-C8-C9-C13A   | 176(2)     | C37-N3-C33-C34  | 10.5(14)  |
| C4-C5-C10-C11   | -116.9(10) | C36-N3-C33-C32  | -11.8(14) |
| C6-C5-C10-C11   | 63.9(12)   | C37-N3-C33-C32  | -171.1(9) |
| C4-C5-C10-C12   | 117.5(9)   | C31-C32-C33-N3  | -179.9(9) |
| C6-C5-C10-C12   | -61.6(12)  | C31-C32-C33-C34 | -1.5(13)  |
| C4-C9-C13-C14   | 107.6(16)  | N3-C33-C34-C35  | 179.5(9)  |
| C8-C9-C13-C14   | -72.1(16)  | C32-C33-C34-C35 | 1.0(14)   |
| C4-C9-C13-C15   | -125.2(15) | C33-C34-C35-C30 | -0.2(15)  |
| C8-C9-C13-C15   | 55.1(19)   | C31-C30-C35-C34 | -0.1(14)  |
| C4-C9-C13A-C14A | 131(2)     | C29-C30-C35-C34 | -178.5(9) |

## The crystal structure of **3c**

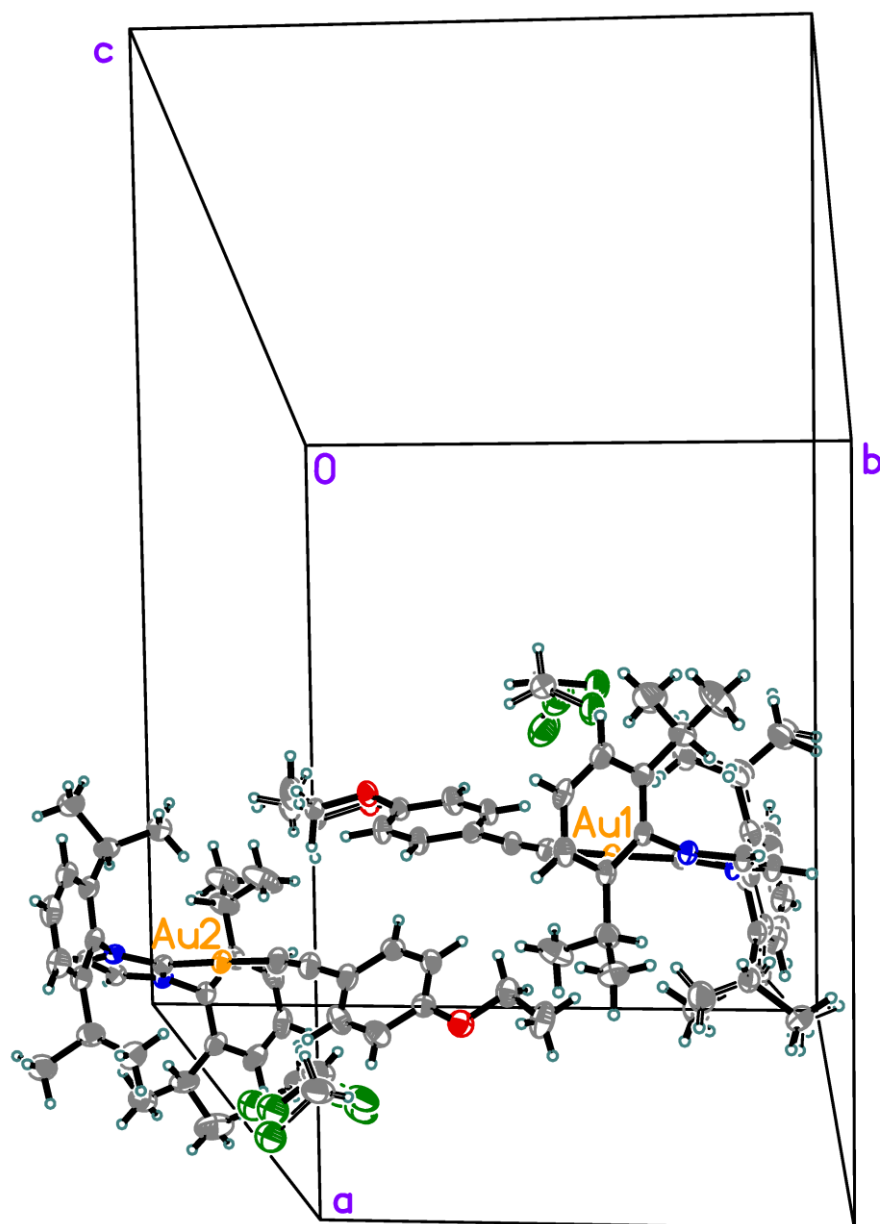

**Figure S62.** The crystal structure of **3c**. Two crystallographically inequivalent molecules are shown in the unit cell. Thermal ellipsoids are shown at a 50% probability level. Hydrogen atoms are drawn as fixed-size spheres. The site occupancies of the disordered dichloromethane molecules are 0.973(3) : 0.027(3) for the upper molecule and 0.625(6) : 0.161(3) : 0.052(4) for the lower molecule.

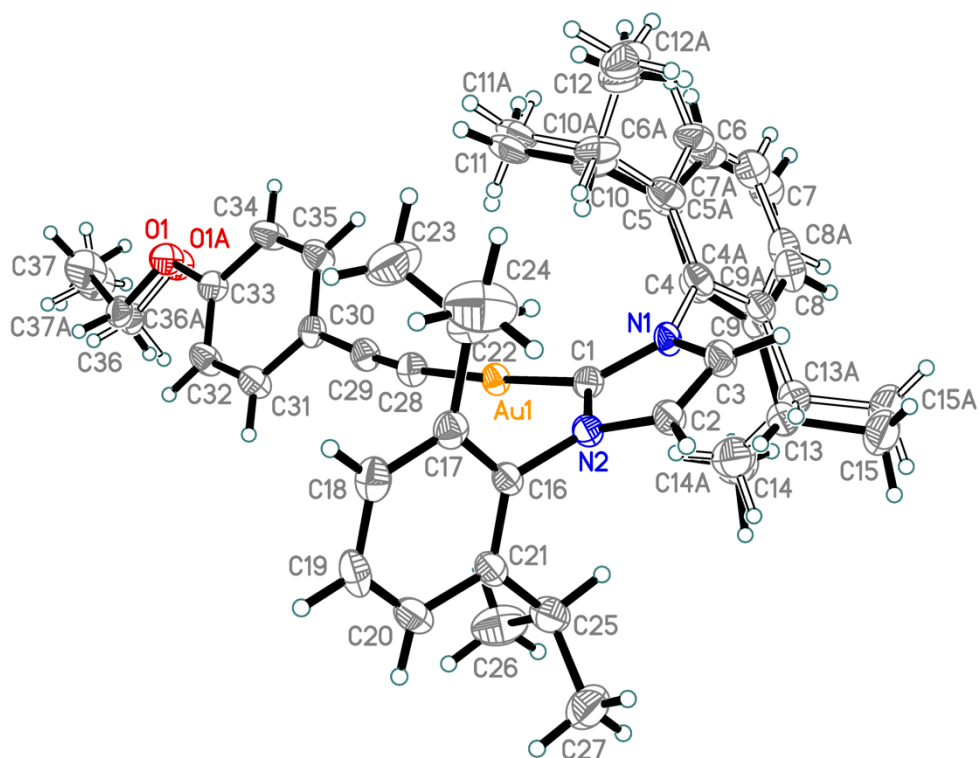

**Figure S63.** The 1<sup>st</sup> molecule of **3c**. Thermal ellipsoids are shown at a 50% probability level. Hydrogen atoms are drawn as fixed-size spheres. The disorder ratio for 2,6-di-isopropylphenyl atoms C4..C15 / C4A..C15A is 0.556(12) : 0.444(12). The disorder ratio for the OEt fragment (atoms O1, C36, C37 / O1A, C36A, C37A) is 0.61(6) : 0.39(6). The minor components of the disorder are drawn with open solid lines.

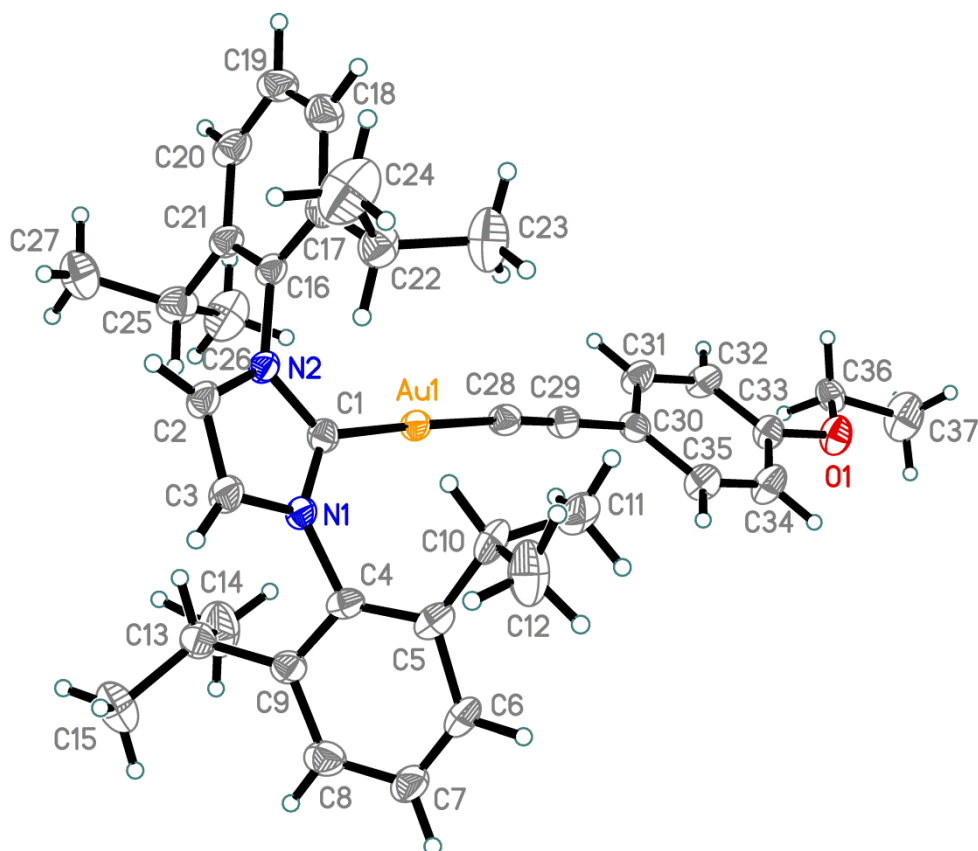

**Figure S64.** The 1<sup>st</sup> molecule of **3c**. Thermal ellipsoids are shown at a 50% probability level. Hydrogen atoms are drawn as fixed-size spheres. Disorder is omitted.



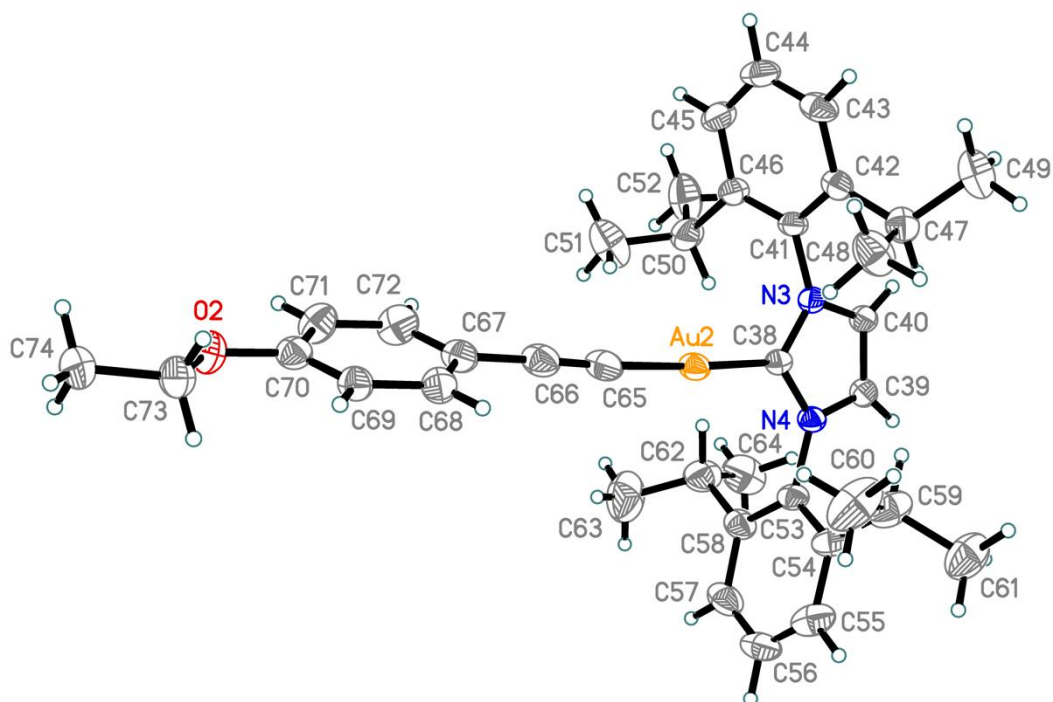

**Figure S65.** The 2<sup>nd</sup> molecule of **3c**. Thermal ellipsoids are shown at a 50% probability level. Hydrogen atoms are drawn as fixed-size spheres.

**Table S16.** Selected bond lengths (Å) for **3c**.

|         |          |           |          |           |          |
|---------|----------|-----------|----------|-----------|----------|
| Au1-C1  | 2.012(3) | C13-C15   | 1.529(4) | C20-C21   | 1.406(5) |
| Au1-C28 | 1.978(3) | C13-C14   | 1.530(4) | C21-C25   | 1.518(5) |
| N1-C1   | 1.355(4) | C4A-C5A   | 1.402(3) | C22-C24   | 1.513(6) |
| N1-C3   | 1.393(4) | C4A-C9A   | 1.402(4) | C22-C23   | 1.527(6) |
| N1-C4A  | 1.450(4) | C5A-C6A   | 1.411(4) | C25-C26   | 1.528(6) |
| N1-C4   | 1.451(4) | C5A-C10A  | 1.515(4) | C25-C27   | 1.532(6) |
| C1-N2   | 1.369(4) | C6A-C7A   | 1.373(4) | C28-C29   | 1.219(4) |
| N2-C2   | 1.377(4) | C7A-C8A   | 1.372(4) | C29-C30   | 1.445(4) |
| N2-C16  | 1.443(4) | C8A-C9A   | 1.410(4) | C30-C31   | 1.387(5) |
| C2-C3   | 1.352(5) | C9A-C13A  | 1.514(4) | C30-C35   | 1.404(5) |
| C4-C5   | 1.402(3) | C10A-C12A | 1.530(4) | C31-C32   | 1.394(5) |
| C4-C9   | 1.403(3) | C10A-C11A | 1.532(4) | C32-C33   | 1.379(5) |
| C5-C6   | 1.411(4) | C13A-C15A | 1.529(4) | C33-O1    | 1.374(5) |
| C5-C10  | 1.516(4) | C13A-C14A | 1.530(4) | C33-O1A   | 1.374(5) |
| C6-C7   | 1.374(4) | C16-C21   | 1.391(4) | C33-C34   | 1.393(5) |
| C7-C8   | 1.373(4) | C16-C17   | 1.400(4) | C34-C35   | 1.379(5) |
| C8-C9   | 1.411(4) | C17-C18   | 1.390(5) | O1-C36    | 1.431(5) |
| C9-C13  | 1.514(4) | C17-C22   | 1.522(5) | C36-C37   | 1.511(6) |
| C10-C12 | 1.530(4) | C18-C19   | 1.392(5) | O1A-C36A  | 1.431(5) |
| C10-C11 | 1.532(4) | C19-C20   | 1.381(5) | C36A-C37A | 1.511(6) |

|         |          |         |          |         |          |
|---------|----------|---------|----------|---------|----------|
| Au2-C38 | 2.014(3) | C45-C46 | 1.397(5) | C59-C60 | 1.547(7) |
| Au2-C65 | 1.984(4) | C46-C50 | 1.526(5) | C62-C63 | 1.531(7) |
| N3-C38  | 1.357(4) | C47-C49 | 1.527(6) | C62-C64 | 1.535(8) |
| N3-C40  | 1.386(4) | C47-C48 | 1.530(6) | C65-C66 | 1.213(5) |
| N3-C41  | 1.436(4) | C50-C51 | 1.519(7) | C66-C67 | 1.447(5) |
| C38-N4  | 1.363(4) | C50-C52 | 1.534(7) | C67-C68 | 1.385(5) |
| N4-C39  | 1.387(4) | C53-C54 | 1.395(5) | C67-C72 | 1.410(6) |
| N4-C53  | 1.442(4) | C53-C58 | 1.404(5) | C68-C69 | 1.392(5) |
| C39-C40 | 1.352(5) | C54-C55 | 1.402(6) | C69-C70 | 1.390(5) |
| C41-C46 | 1.397(5) | C54-C59 | 1.506(6) | C70-O2  | 1.376(5) |
| C41-C42 | 1.400(5) | C55-C56 | 1.370(7) | C70-C71 | 1.390(5) |
| C42-C43 | 1.392(5) | C56-C57 | 1.376(7) | C71-C72 | 1.384(6) |
| C42-C47 | 1.518(5) | C57-C58 | 1.396(5) | O2-C73  | 1.426(5) |
| C43-C44 | 1.376(6) | C58-C62 | 1.517(6) | C73-C74 | 1.515(6) |
| C44-C45 | 1.387(6) | C59-C61 | 1.535(6) |         |          |

**Table S17.** Selected bond angles (°) for **3c**.

|            |            |                |           |
|------------|------------|----------------|-----------|
| C28-Au1-C1 | 176.85(13) | C8A-C9A-C13A   | 122.9(11) |
| C1-N1-C3   | 111.6(3)   | C5A-C10A-C12A  | 116(3)    |
| C1-N1-C4A  | 127.2(5)   | C5A-C10A-C11A  | 109(2)    |
| C3-N1-C4A  | 121.2(5)   | C12A-C10A-C11A | 109.3(11) |
| C1-N1-C4   | 122.1(4)   | C9A-C13A-C15A  | 114.7(10) |
| C3-N1-C4   | 126.2(4)   | C9A-C13A-C14A  | 110.4(14) |
| N1-C1-N2   | 103.6(3)   | C15A-C13A-C14A | 111.4(10) |
| N1-C1-Au1  | 128.3(2)   | C21-C16-C17    | 124.3(3)  |
| N2-C1-Au1  | 128.0(2)   | C21-C16-N2     | 119.6(3)  |
| C1-N2-C2   | 111.7(3)   | C17-C16-N2     | 116.0(3)  |
| C1-N2-C16  | 124.2(3)   | C18-C17-C16    | 116.8(3)  |
| C2-N2-C16  | 123.4(3)   | C18-C17-C22    | 121.1(3)  |
| C3-C2-N2   | 106.8(3)   | C16-C17-C22    | 122.1(3)  |
| C2-C3-N1   | 106.3(3)   | C17-C18-C19    | 120.7(3)  |
| C5-C4-C9   | 127.8(8)   | C20-C19-C18    | 120.9(3)  |
| C5-C4-N1   | 116.7(9)   | C19-C20-C21    | 120.5(3)  |
| C9-C4-N1   | 114.7(9)   | C16-C21-C20    | 116.7(3)  |
| C4-C5-C6   | 111.7(10)  | C16-C21-C25    | 123.1(3)  |
| C4-C5-C10  | 121.8(12)  | C20-C21-C25    | 120.2(3)  |
| C6-C5-C10  | 126.4(13)  | C24-C22-C17    | 111.9(3)  |
| C7-C6-C5   | 124.8(11)  | C24-C22-C23    | 112.0(4)  |
| C8-C7-C6   | 119.3(11)  | C17-C22-C23    | 110.4(4)  |

|              |            |               |           |
|--------------|------------|---------------|-----------|
| C7-C8-C9     | 122.0(11)  | C21-C25-C26   | 111.8(3)  |
| C4-C9-C8     | 114.4(8)   | C21-C25-C27   | 111.2(3)  |
| C4-C9-C13    | 123.5(10)  | C26-C25-C27   | 110.9(3)  |
| C8-C9-C13    | 122.1(8)   | C29-C28-Au1   | 172.7(3)  |
| C5-C10-C12   | 111(2)     | C28-C29-C30   | 175.5(4)  |
| C5-C10-C11   | 112.0(16)  | C31-C30-C35   | 117.1(3)  |
| C12-C10-C11  | 108.5(9)   | C31-C30-C29   | 121.8(3)  |
| C9-C13-C15   | 113.2(7)   | C35-C30-C29   | 121.1(3)  |
| C9-C13-C14   | 107.9(11)  | C30-C31-C32   | 122.0(3)  |
| C15-C13-C14  | 113.4(8)   | C33-C32-C31   | 119.7(3)  |
| C5A-C4A-C9A  | 118.2(10)  | O1-C33-C32    | 124.1(9)  |
| C5A-C4A-N1   | 121.2(11)  | O1A-C33-C32   | 124.0(14) |
| C9A-C4A-N1   | 120.6(12)  | O1-C33-C34    | 116.3(9)  |
| C4A-C5A-C6A  | 123.0(14)  | O1A-C33-C34   | 115.8(15) |
| C4A-C5A-C10A | 125.9(15)  | C32-C33-C34   | 119.5(3)  |
| C6A-C5A-C10A | 111.2(16)  | C35-C34-C33   | 120.3(3)  |
| C7A-C6A-C5A  | 117.0(15)  | C34-C35-C30   | 121.3(3)  |
| C8A-C7A-C6A  | 121.7(15)  | C33-O1-C36    | 117.7(14) |
| C7A-C8A-C9A  | 121.6(14)  | O1-C36-C37    | 106.4(19) |
| C4A-C9A-C8A  | 118.5(10)  | C33-O1A-C36A  | 117(2)    |
| C4A-C9A-C13A | 118.7(13)  | O1A-C36A-C37A | 108(3)    |
| C65-Au2-C38  | 176.40(15) | C54-C53-N4    | 118.8(3)  |
| C38-N3-C40   | 110.9(3)   | C58-C53-N4    | 117.8(3)  |
| C38-N3-C41   | 124.7(3)   | C53-C54-C55   | 116.4(4)  |
| C40-N3-C41   | 124.4(3)   | C53-C54-C59   | 122.0(3)  |
| N3-C38-N4    | 104.6(3)   | C55-C54-C59   | 121.6(4)  |
| N3-C38-Au2   | 126.8(2)   | C56-C55-C54   | 121.3(4)  |
| N4-C38-Au2   | 128.6(2)   | C55-C56-C57   | 121.2(4)  |
| C38-N4-C39   | 111.0(3)   | C56-C57-C58   | 120.5(4)  |
| C38-N4-C53   | 124.9(3)   | C57-C58-C53   | 117.1(4)  |
| C39-N4-C53   | 124.1(3)   | C57-C58-C62   | 120.9(4)  |
| C40-C39-N4   | 106.5(3)   | C53-C58-C62   | 122.0(3)  |
| C39-C40-N3   | 107.1(3)   | C54-C59-C61   | 111.7(4)  |
| C46-C41-C42  | 123.1(3)   | C54-C59-C60   | 110.0(4)  |
| C46-C41-N3   | 118.5(3)   | C61-C59-C60   | 111.2(4)  |
| C42-C41-N3   | 118.4(3)   | C58-C62-C63   | 113.0(4)  |
| C43-C42-C41  | 116.7(3)   | C58-C62-C64   | 110.8(4)  |
| C43-C42-C47  | 121.9(3)   | C63-C62-C64   | 110.3(4)  |
| C41-C42-C47  | 121.4(3)   | C66-C65-Au2   | 171.1(4)  |
| C44-C43-C42  | 122.2(4)   | C65-C66-C67   | 174.8(4)  |

|             |          |             |          |
|-------------|----------|-------------|----------|
| C43-C44-C45 | 119.7(3) | C68-C67-C72 | 118.2(4) |
| C44-C45-C46 | 121.0(4) | C68-C67-C66 | 122.3(4) |
| C45-C46-C41 | 117.3(4) | C72-C67-C66 | 119.5(4) |
| C45-C46-C50 | 119.7(3) | C67-C68-C69 | 121.1(4) |
| C41-C46-C50 | 122.9(3) | C70-C69-C68 | 120.1(3) |
| C42-C47-C49 | 113.3(4) | O2-C70-C69  | 124.5(3) |
| C42-C47-C48 | 110.7(3) | O2-C70-C71  | 115.8(3) |
| C49-C47-C48 | 109.0(3) | C69-C70-C71 | 119.6(4) |
| C51-C50-C46 | 110.2(4) | C72-C71-C70 | 120.1(4) |
| C51-C50-C52 | 109.9(4) | C71-C72-C67 | 120.8(4) |
| C46-C50-C52 | 112.4(4) | C70-O2-C73  | 117.7(3) |
| C54-C53-C58 | 123.5(3) | O2-C73-C74  | 107.6(4) |

**Table S18.** Torsion angles (°) for **3c**.

|               |           |                   |            |
|---------------|-----------|-------------------|------------|
| C3-N1-C1-N2   | 0.7(3)    | C5A-C4A-C9A-C13A  | -179.3(3)  |
| C4A-N1-C1-N2  | -177.4(8) | N1-C4A-C9A-C13A   | -0.2(11)   |
| C4-N1-C1-N2   | 177.2(6)  | C7A-C8A-C9A-C4A   | 0.7(6)     |
| C3-N1-C1-Au1  | -179.1(2) | C7A-C8A-C9A-C13A  | 179.5(4)   |
| C4A-N1-C1-Au1 | 2.8(9)    | C4A-C5A-C10A-C12A | 122(2)     |
| C4-N1-C1-Au1  | -2.6(7)   | C6A-C5A-C10A-C12A | -58(2)     |
| N1-C1-N2-C2   | -0.5(3)   | C4A-C5A-C10A-C11A | -114.5(16) |
| Au1-C1-N2-C2  | 179.3(2)  | C6A-C5A-C10A-C11A | 65.0(16)   |
| N1-C1-N2-C16  | 170.1(3)  | C4A-C9A-C13A-C15A | -148.7(11) |
| Au1-C1-N2-C16 | -10.1(4)  | C8A-C9A-C13A-C15A | 32.4(12)   |
| C1-N2-C2-C3   | 0.2(4)    | C4A-C9A-C13A-C14A | 84.5(14)   |
| C16-N2-C2-C3  | -170.5(3) | C8A-C9A-C13A-C14A | -94.4(14)  |
| N2-C2-C3-N1   | 0.3(4)    | C1-N2-C16-C21     | 88.4(4)    |
| C1-N1-C3-C2   | -0.6(4)   | C2-N2-C16-C21     | -102.0(4)  |
| C4A-N1-C3-C2  | 177.6(8)  | C1-N2-C16-C17     | -94.4(4)   |
| C4-N1-C3-C2   | -177.0(7) | C2-N2-C16-C17     | 75.2(4)    |
| C1-N1-C4-C5   | 84.7(5)   | C21-C16-C17-C18   | 1.9(5)     |
| C3-N1-C4-C5   | -99.3(6)  | N2-C16-C17-C18    | -175.2(3)  |
| C1-N1-C4-C9   | -104.6(5) | C21-C16-C17-C22   | -177.3(3)  |
| C3-N1-C4-C9   | 71.3(8)   | N2-C16-C17-C22    | 5.6(4)     |
| C9-C4-C5-C6   | 0.2(2)    | C16-C17-C18-C19   | -1.2(5)    |
| N1-C4-C5-C6   | 169.5(7)  | C22-C17-C18-C19   | 178.0(3)   |
| C9-C4-C5-C10  | 179.7(3)  | C17-C18-C19-C20   | -0.7(5)    |
| N1-C4-C5-C10  | -11.0(7)  | C18-C19-C20-C21   | 2.2(5)     |
| C4-C5-C6-C7   | -0.1(2)   | C17-C16-C21-C20   | -0.5(5)    |

|                  |            |                   |            |
|------------------|------------|-------------------|------------|
| C10-C5-C6-C7     | -179.5(3)  | N2-C16-C21-C20    | 176.5(3)   |
| C5-C6-C7-C8      | 0.2(4)     | C17-C16-C21-C25   | 178.4(3)   |
| C6-C7-C8-C9      | -0.6(6)    | N2-C16-C21-C25    | -4.7(5)    |
| C5-C4-C9-C8      | -0.6(4)    | C19-C20-C21-C16   | -1.5(5)    |
| N1-C4-C9-C8      | -170.0(8)  | C19-C20-C21-C25   | 179.5(3)   |
| C5-C4-C9-C13     | -179.2(2)  | C18-C17-C22-C24   | 56.4(5)    |
| N1-C4-C9-C13     | 11.4(8)    | C16-C17-C22-C24   | -124.4(4)  |
| C7-C8-C9-C4      | 0.7(5)     | C18-C17-C22-C23   | -69.0(5)   |
| C7-C8-C9-C13     | 179.4(4)   | C16-C17-C22-C23   | 110.2(4)   |
| C4-C5-C10-C12    | 129.3(17)  | C16-C21-C25-C26   | -111.0(4)  |
| C6-C5-C10-C12    | -51.3(17)  | C20-C21-C25-C26   | 67.9(4)    |
| C4-C5-C10-C11    | -109.2(12) | C16-C21-C25-C27   | 124.4(4)   |
| C6-C5-C10-C11    | 70.2(12)   | C20-C21-C25-C27   | -56.7(5)   |
| C4-C9-C13-C15    | -131.2(9)  | C35-C30-C31-C32   | -0.3(5)    |
| C8-C9-C13-C15    | 50.2(9)    | C29-C30-C31-C32   | 178.7(3)   |
| C4-C9-C13-C14    | 102.4(10)  | C30-C31-C32-C33   | -0.9(6)    |
| C8-C9-C13-C14    | -76.2(10)  | C31-C32-C33-O1    | -175.1(15) |
| C1-N1-C4A-C5A    | 74.9(8)    | C31-C32-C33-O1A   | 172(2)     |
| C3-N1-C4A-C5A    | -103.0(6)  | C31-C32-C33-C34   | 1.8(6)     |
| C1-N1-C4A-C9A    | -104.2(8)  | O1-C33-C34-C35    | 175.7(14)  |
| C3-N1-C4A-C9A    | 77.9(9)    | O1A-C33-C34-C35   | -172.3(18) |
| C9A-C4A-C5A-C6A  | 0.2(2)     | C32-C33-C34-C35   | -1.4(6)    |
| N1-C4A-C5A-C6A   | -178.9(10) | C33-C34-C35-C30   | 0.2(6)     |
| C9A-C4A-C5A-C10A | 179.6(3)   | C31-C30-C35-C34   | 0.7(5)     |
| N1-C4A-C5A-C10A  | 0.6(10)    | C29-C30-C35-C34   | -178.4(4)  |
| C4A-C5A-C6A-C7A  | -0.1(2)    | C32-C33-O1-C36    | -13(2)     |
| C10A-C5A-C6A-C7A | -179.7(3)  | C34-C33-O1-C36    | 170.2(12)  |
| C5A-C6A-C7A-C8A  | 0.3(5)     | C33-O1-C36-C37    | -173(2)    |
| C6A-C7A-C8A-C9A  | -0.6(7)    | C32-C33-O1A-C36A  | -1(4)      |
| C5A-C4A-C9A-C8A  | -0.4(5)    | C34-C33-O1A-C36A  | 169(2)     |
| N1-C4A-C9A-C8A   | 178.7(10)  | C33-O1A-C36A-C37A | 174(3)     |
| C40-N3-C38-N4    | 0.1(3)     | C38-N4-C53-C54    | -89.0(4)   |
| C41-N3-C38-N4    | 177.8(3)   | C39-N4-C53-C54    | 92.8(4)    |
| C40-N3-C38-Au2   | -179.7(2)  | C38-N4-C53-C58    | 92.1(4)    |
| C41-N3-C38-Au2   | -2.0(5)    | C39-N4-C53-C58    | -86.1(4)   |
| N3-C38-N4-C39    | 0.1(4)     | C58-C53-C54-C55   | 2.0(5)     |
| Au2-C38-N4-C39   | 179.9(2)   | N4-C53-C54-C55    | -176.8(3)  |
| N3-C38-N4-C53    | -178.3(3)  | C58-C53-C54-C59   | -177.4(4)  |
| Au2-C38-N4-C53   | 1.5(5)     | N4-C53-C54-C59    | 3.8(5)     |
| C38-N4-C39-C40   | -0.3(4)    | C53-C54-C55-C56   | -0.8(6)    |

|                 |           |                 |           |
|-----------------|-----------|-----------------|-----------|
| C53-N4-C39-C40  | 178.1(3)  | C59-C54-C55-C56 | 178.6(4)  |
| N4-C39-C40-N3   | 0.3(4)    | C54-C55-C56-C57 | -0.6(6)   |
| C38-N3-C40-C39  | -0.3(4)   | C55-C56-C57-C58 | 0.8(6)    |
| C41-N3-C40-C39  | -178.0(3) | C56-C57-C58-C53 | 0.4(6)    |
| C38-N3-C41-C46  | -84.6(4)  | C56-C57-C58-C62 | 179.7(4)  |
| C40-N3-C41-C46  | 92.8(4)   | C54-C53-C58-C57 | -1.8(5)   |
| C38-N3-C41-C42  | 96.3(4)   | N4-C53-C58-C57  | 177.0(3)  |
| C40-N3-C41-C42  | -86.3(4)  | C54-C53-C58-C62 | 178.9(4)  |
| C46-C41-C42-C43 | -2.2(5)   | N4-C53-C58-C62  | -2.3(5)   |
| N3-C41-C42-C43  | 176.8(3)  | C53-C54-C59-C61 | -130.8(4) |
| C46-C41-C42-C47 | 176.2(3)  | C55-C54-C59-C61 | 49.8(6)   |
| N3-C41-C42-C47  | -4.8(5)   | C53-C54-C59-C60 | 105.3(5)  |
| C41-C42-C43-C44 | 0.5(5)    | C55-C54-C59-C60 | -74.1(5)  |
| C47-C42-C43-C44 | -177.8(4) | C57-C58-C62-C63 | 36.5(6)   |
| C42-C43-C44-C45 | 1.0(6)    | C53-C58-C62-C63 | -144.2(4) |
| C43-C44-C45-C46 | -0.9(6)   | C57-C58-C62-C64 | -87.9(5)  |
| C44-C45-C46-C41 | -0.7(6)   | C53-C58-C62-C64 | 91.4(5)   |
| C44-C45-C46-C50 | 177.6(4)  | C72-C67-C68-C69 | 0.5(6)    |
| C42-C41-C46-C45 | 2.3(5)    | C66-C67-C68-C69 | -177.5(4) |
| N3-C41-C46-C45  | -176.7(3) | C67-C68-C69-C70 | 1.2(6)    |
| C42-C41-C46-C50 | -176.0(4) | C68-C69-C70-O2  | 176.5(3)  |
| N3-C41-C46-C50  | 5.0(5)    | C68-C69-C70-C71 | -2.0(6)   |
| C43-C42-C47-C49 | -41.1(5)  | O2-C70-C71-C72  | -177.5(4) |
| C41-C42-C47-C49 | 140.7(4)  | C69-C70-C71-C72 | 1.1(6)    |
| C43-C42-C47-C48 | 81.7(5)   | C70-C71-C72-C67 | 0.5(7)    |
| C41-C42-C47-C48 | -96.6(4)  | C68-C67-C72-C71 | -1.3(6)   |
| C45-C46-C50-C51 | -67.5(5)  | C66-C67-C72-C71 | 176.7(4)  |
| C41-C46-C50-C51 | 110.7(5)  | C69-C70-O2-C73  | 6.7(5)    |
| C45-C46-C50-C52 | 55.5(5)   | C71-C70-O2-C73  | -174.8(4) |

## The crystal structure of **3e**

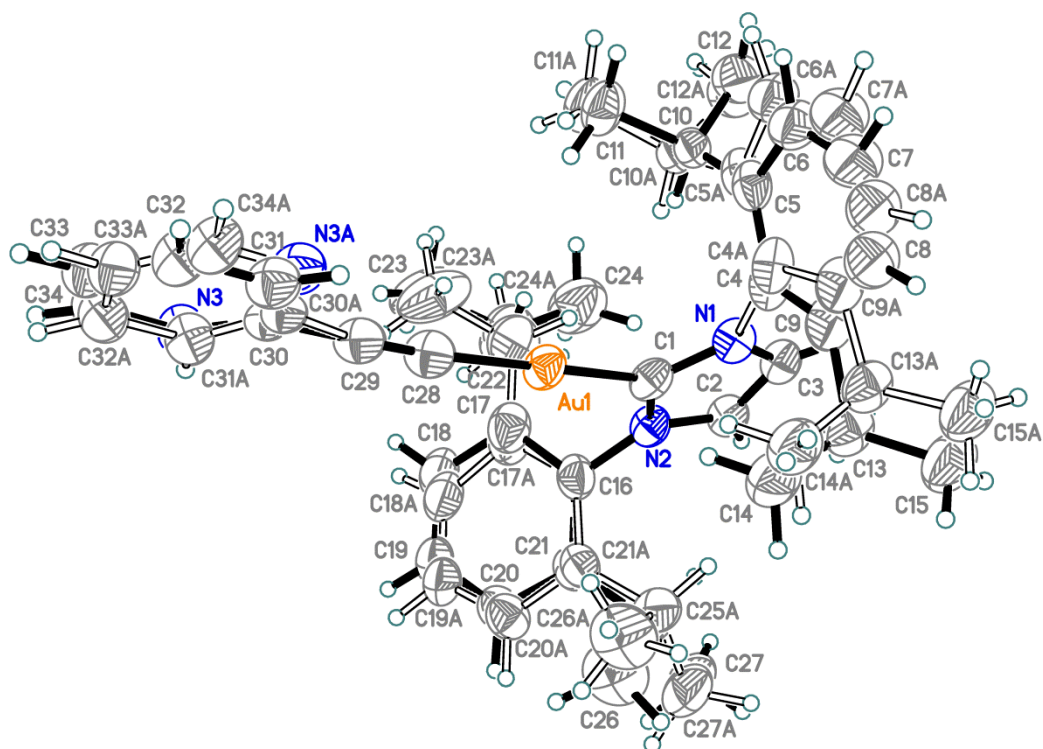

**Figure S66.** The 1<sup>st</sup> molecule of **3e**. Thermal ellipsoids are shown at a 50% probability level. Hydrogen atoms are drawn as fixed-size spheres.

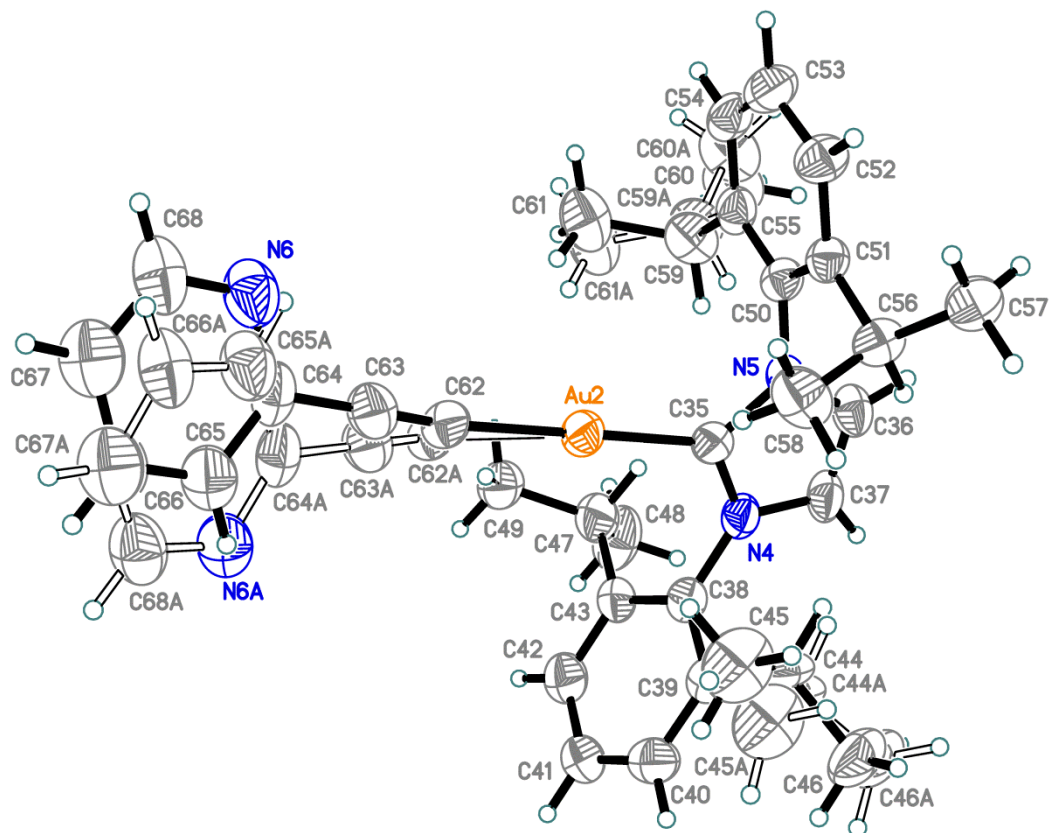

**Figure S67.** The 2<sup>nd</sup> molecule of **3e**. Thermal ellipsoids are shown at a 50% probability level. Hydrogen atoms are drawn as fixed-size spheres.

**Table S19.** Selected bond lengths (Å) for **3e**.

|          |           |           |           |           |           |
|----------|-----------|-----------|-----------|-----------|-----------|
| Au1-C1   | 2.021(8)  | C5A-C10A  | 1.51(3)   | C17A-C22A | 1.52(2)   |
| Au1-C28  | 1.999(8)  | C6A-C7A   | 1.38(2)   | C18A-C19A | 1.37(2)   |
| N1-C1    | 1.344(11) | C7A-C8A   | 1.39(2)   | C19A-C20A | 1.38(2)   |
| N1-C3    | 1.368(10) | C8A-C9A   | 1.39(2)   | C20A-C21A | 1.41(2)   |
| N1-C4    | 1.416(12) | C9A-C13A  | 1.44(5)   | C21A-C25A | 1.51(2)   |
| N1-C4A   | 1.48(2)   | C10A-C11A | 1.53(2)   | C22A-C23A | 1.54(2)   |
| C1-N2    | 1.361(10) | C10A-C12A | 1.53(2)   | C22A-C24A | 1.55(2)   |
| N2-C2    | 1.379(10) | C13A-C14A | 1.52(2)   | C25A-C26A | 1.55(2)   |
| N2-C16   | 1.440(10) | C13A-C15A | 1.53(2)   | C25A-C27A | 1.55(2)   |
| C2-C3    | 1.352(12) | C16-C17   | 1.417(17) | C28-C29   | 1.189(12) |
| C4-C5    | 1.404(14) | C16-C21   | 1.395(16) | C29-C30   | 1.470(12) |
| C4-C9    | 1.421(15) | C16-C17A  | 1.407(19) | C29-C30A  | 1.43(2)   |
| C5-C6    | 1.396(14) | C16-C21A  | 1.403(19) | C30-C31   | 1.43(2)   |
| C5-C10   | 1.514(15) | C17-C18   | 1.413(18) | C30-N3    | 1.304(19) |
| C6-C7    | 1.380(15) | C17-C22   | 1.52(2)   | C31-C32   | 1.38(2)   |
| C7-C8    | 1.379(15) | C18-C19   | 1.373(18) | C32-C33   | 1.366(19) |
| C8-C9    | 1.390(16) | C19-C20   | 1.385(17) | C33-C34   | 1.390(17) |
| C9-C13   | 1.52(2)   | C20-C21   | 1.406(17) | C34-N3    | 1.315(18) |
| C10-C11  | 1.533(15) | C21-C25   | 1.503(19) | C30A-C31A | 1.42(3)   |
| C10-C12  | 1.531(16) | C22-C23   | 1.55(2)   | C30A-N3A  | 1.29(3)   |
| C13-C14  | 1.523(17) | C22-C24   | 1.55(2)   | C31A-C32A | 1.38(3)   |
| C13-C15  | 1.502(15) | C25-C26   | 1.544(18) | C32A-C33A | 1.37(3)   |
| C4A-C5A  | 1.42(2)   | C25-C27   | 1.536(18) | C33A-C34A | 1.39(3)   |
| C4A-C9A  | 1.43(2)   | C17A-C18A | 1.41(2)   | C34A-N3A  | 1.31(3)   |
| C5A-C6A  | 1.40(2)   |           |           |           |           |
| Au2-C35  | 2.007(8)  | C44-C45   | 1.51(2)   | C59A-C60A | 1.55(2)   |
| Au2-C62  | 2.052(10) | C44-C46   | 1.54(2)   | C59A-C61A | 1.55(2)   |
| Au2-C62A | 2.11(2)   | C44A-C45A | 1.52(2)   | C62-C63   | 1.143(14) |
| N4-C35   | 1.349(10) | C44A-C46A | 1.53(2)   | C63-C64   | 1.485(16) |
| N4-C37   | 1.393(10) | C47-C48   | 1.487(16) | C64-C65   | 1.384(19) |
| N4-C38   | 1.430(10) | C47-C49   | 1.527(14) | C64-N6    | 1.364(18) |
| C35-N5   | 1.386(11) | C50-C51   | 1.387(11) | C65-C66   | 1.36(2)   |
| N5-C36   | 1.354(11) | C50-C55   | 1.406(11) | C66-C67   | 1.42(2)   |
| N5-C50   | 1.472(10) | C51-C52   | 1.405(12) | C67-C68   | 1.39(2)   |
| C36-C37  | 1.341(13) | C51-C56   | 1.514(11) | C68-N6    | 1.344(18) |
| C38-C39  | 1.401(12) | C52-C53   | 1.391(12) | C62A-C63A | 1.11(2)   |
| C38-C43  | 1.391(12) | C53-C54   | 1.375(14) | C63A-C64A | 1.48(2)   |
| C39-C40  | 1.382(12) | C54-C55   | 1.378(12) | C64A-C65A | 1.39(3)   |



|          |           |          |           |           |         |
|----------|-----------|----------|-----------|-----------|---------|
| C39-C44  | 1.530(19) | C55-C59  | 1.509(15) | C64A-N6A  | 1.36(3) |
| C39-C44A | 1.53(2)   | C55-C59A | 1.51(2)   | C65A-C66A | 1.35(3) |
| C40-C41  | 1.375(13) | C56-C57  | 1.528(13) | C66A-C67A | 1.39(3) |
| C41-C42  | 1.404(14) | C56-C58  | 1.534(13) | C67A-C68A | 1.37(3) |
| C42-C43  | 1.374(13) | C59-C60  | 1.537(16) | C68A-N6A  | 1.36(3) |
| C43-C47  | 1.535(13) | C59-C61  | 1.558(18) |           |         |

**Table S20.** Selected bond angles (°) for **3e**.

|             |           |                |           |
|-------------|-----------|----------------|-----------|
| C28-Au1-C1  | 177.8(3)  | C17A-C16-N2    | 121.7(19) |
| C1-N1-C3    | 112.4(7)  | C21A-C16-N2    | 111.8(14) |
| C1-N1-C4    | 124.9(7)  | C21A-C16-C17A  | 126(2)    |
| C1-N1-C4A   | 126.3(12) | C16-C17-C22    | 127.9(19) |
| C3-N1-C4    | 122.7(8)  | C18-C17-C16    | 118(2)    |
| C3-N1-C4A   | 121.0(12) | C18-C17-C22    | 113.8(19) |
| N1-C1-Au1   | 129.6(6)  | C19-C18-C17    | 120(3)    |
| N1-C1-N2    | 103.6(6)  | C18-C19-C20    | 120(3)    |
| N2-C1-Au1   | 126.7(6)  | C19-C20-C21    | 122(2)    |
| C1-N2-C2    | 111.3(7)  | C16-C21-C20    | 116.7(17) |
| C1-N2-C16   | 122.5(6)  | C16-C21-C25    | 120.2(16) |
| C2-N2-C16   | 126.2(6)  | C20-C21-C25    | 123.1(16) |
| C3-C2-N2    | 106.3(7)  | C17-C22-C23    | 118(2)    |
| C2-C3-N1    | 106.4(7)  | C17-C22-C24    | 115(2)    |
| N1-C4-C9    | 115.4(15) | C23-C22-C24    | 105.5(19) |
| C5-C4-N1    | 120.6(15) | C21-C25-C26    | 109.1(18) |
| C5-C4-C9    | 124.0(11) | C21-C25-C27    | 111.4(16) |
| C4-C5-C10   | 121.0(18) | C27-C25-C26    | 114.9(17) |
| C6-C5-C4    | 116.8(11) | C16-C17A-C22A  | 116(3)    |
| C6-C5-C10   | 122.2(18) | C18A-C17A-C16  | 114(3)    |
| C7-C6-C5    | 120.0(12) | C18A-C17A-C22A | 129(3)    |
| C8-C7-C6    | 122.3(11) | C19A-C18A-C17A | 122(4)    |
| C7-C8-C9    | 120.8(12) | C18A-C19A-C20A | 120(4)    |
| C4-C9-C13   | 123.5(13) | C19A-C20A-C21A | 122(3)    |
| C8-C9-C4    | 116.0(12) | C16-C21A-C20A  | 114(2)    |
| C8-C9-C13   | 120.5(13) | C16-C21A-C25A  | 126(2)    |
| C5-C10-C11  | 108.6(11) | C20A-C21A-C25A | 120(2)    |
| C5-C10-C12  | 115(3)    | C17A-C22A-C23A | 111(3)    |
| C12-C10-C11 | 110.6(14) | C17A-C22A-C24A | 100(3)    |
| C9-C13-C14  | 107.9(10) | C23A-C22A-C24A | 110(2)    |
| C15-C13-C9  | 116.3(12) | C21A-C25A-C26A | 108(3)    |

|                |           |                |           |
|----------------|-----------|----------------|-----------|
| C15-C13-C14    | 108.9(12) | C21A-C25A-C27A | 108(2)    |
| C5A-C4A-N1     | 116(4)    | C27A-C25A-C26A | 114(2)    |
| C5A-C4A-C9A    | 116.0(18) | C29-C28-Au1    | 176.4(8)  |
| C9A-C4A-N1     | 128(4)    | C28-C29-C30    | 177.4(11) |
| C4A-C5A-C10A   | 123(5)    | C28-C29-C30A   | 169(2)    |
| C6A-C5A-C4A    | 122(2)    | C31-C30-C29    | 119.2(12) |
| C6A-C5A-C10A   | 115(5)    | N3-C30-C29     | 120.3(13) |
| C7A-C6A-C5A    | 120(2)    | N3-C30-C31     | 120.4(10) |
| C6A-C7A-C8A    | 120(2)    | C32-C31-C30    | 119.2(14) |
| C7A-C8A-C9A    | 120(2)    | C33-C32-C31    | 119.0(13) |
| C4A-C9A-C13A   | 113(3)    | C32-C33-C34    | 117.5(10) |
| C8A-C9A-C4A    | 121(2)    | N3-C34-C33     | 124.5(14) |
| C8A-C9A-C13A   | 126(4)    | C30-N3-C34     | 119.4(12) |
| C5A-C10A-C11A  | 118(4)    | C31A-C30A-C29  | 109(3)    |
| C5A-C10A-C12A  | 102(10)   | N3A-C30A-C29   | 126(4)    |
| C11A-C10A-C12A | 111(3)    | N3A-C30A-C31A  | 125(2)    |
| C9A-C13A-C14A  | 110(3)    | C32A-C31A-C30A | 116(3)    |
| C9A-C13A-C15A  | 118(3)    | C33A-C32A-C31A | 119(3)    |
| C14A-C13A-C15A | 104(3)    | C32A-C33A-C34A | 120(2)    |
| C17-C16-N2     | 114.6(13) | N3A-C34A-C33A  | 122(3)    |
| C21-C16-N2     | 122.9(11) | C30A-N3A-C34A  | 118(3)    |
| C21-C16-C17    | 122.4(18) |                |           |
| C35-Au2-C62    | 178.7(4)  | C50-C51-C56    | 122.2(7)  |
| C35-Au2-C62A   | 166.7(9)  | C52-C51-C56    | 121.3(8)  |
| C35-N4-C37     | 111.0(7)  | C53-C52-C51    | 120.8(9)  |
| C35-N4-C38     | 122.5(6)  | C54-C53-C52    | 120.6(9)  |
| C37-N4-C38     | 126.5(7)  | C53-C54-C55    | 121.1(8)  |
| N4-C35-Au2     | 125.0(6)  | C50-C55-C59    | 120.7(12) |
| N4-C35-N5      | 103.3(6)  | C50-C55-C59A   | 128(3)    |
| N5-C35-Au2     | 131.5(6)  | C54-C55-C50    | 117.3(8)  |
| C35-N5-C50     | 121.0(7)  | C54-C55-C59    | 121.8(12) |
| C36-N5-C35     | 111.7(7)  | C54-C55-C59A   | 115(3)    |
| C36-N5-C50     | 127.1(7)  | C51-C56-C57    | 113.1(7)  |
| C37-C36-N5     | 107.1(8)  | C51-C56-C58    | 111.2(7)  |
| C36-C37-N4     | 106.9(7)  | C57-C56-C58    | 109.4(7)  |
| C39-C38-N4     | 118.0(8)  | C55-C59-C60    | 110.3(16) |
| C43-C38-N4     | 119.1(8)  | C55-C59-C61    | 107.3(16) |
| C43-C38-C39    | 122.9(8)  | C60-C59-C61    | 111.0(14) |
| C38-C39-C44    | 117.9(14) | C55-C59A-C60A  | 113(4)    |
| C38-C39-C44A   | 126.1(16) | C55-C59A-C61A  | 123(4)    |

|                |           |                |           |
|----------------|-----------|----------------|-----------|
| C40-C39-C38    | 117.6(8)  | C60A-C59A-C61A | 108(3)    |
| C40-C39-C44    | 124.1(14) | C63-C62-Au2    | 170.9(8)  |
| C40-C39-C44A   | 116.0(16) | C62-C63-C64    | 179.5(10) |
| C41-C40-C39    | 121.0(9)  | C65-C64-C63    | 120.3(11) |
| C40-C41-C42    | 120.1(9)  | N6-C64-C63     | 116.8(10) |
| C43-C42-C41    | 120.7(9)  | N6-C64-C65     | 122.7(12) |
| C38-C43-C47    | 122.5(8)  | C66-C65-C64    | 120.4(15) |
| C42-C43-C38    | 117.7(8)  | C65-C66-C67    | 117.5(15) |
| C42-C43-C47    | 119.8(8)  | C68-C67-C66    | 119.5(16) |
| C39-C44-C46    | 107(2)    | N6-C68-C67     | 122.4(18) |
| C45-C44-C39    | 111(2)    | C68-N6-C64     | 117.3(14) |
| C45-C44-C46    | 112(2)    | C63A-C62A-Au2  | 149.7(18) |
| C39-C44A-C46A  | 114(2)    | C62A-C63A-C64A | 180(4)    |
| C45A-C44A-C39  | 112(2)    | C65A-C64A-C63A | 117(2)    |
| C45A-C44A-C46A | 113(2)    | N6A-C64A-C63A  | 118(2)    |
| C48-C47-C43    | 111.8(9)  | N6A-C64A-C65A  | 125(2)    |
| C48-C47-C49    | 112.2(8)  | C66A-C65A-C64A | 121(3)    |
| C49-C47-C43    | 110.6(8)  | C65A-C66A-C67A | 114(3)    |
| C51-C50-N5     | 119.5(7)  | C68A-C67A-C66A | 123(3)    |
| C51-C50-C55    | 123.7(7)  | N6A-C68A-C67A  | 122(3)    |
| C55-C50-N5     | 116.7(7)  | C68A-N6A-C64A  | 114(2)    |
| C50-C51-C52    | 116.4(7)  |                |           |

**Table S21.** Torsion angles (°) for **3e**.

|                 |           |                   |           |
|-----------------|-----------|-------------------|-----------|
| Au1-C1-N2-C2    | 177.5(5)  | C4A-C9A-C13A-C15A | 157(3)    |
| Au1-C1-N2-C16   | -3.3(10)  | C5A-C4A-C9A-C8A   | 0.0(7)    |
| N1-C1-N2-C2     | 0.1(8)    | C5A-C4A-C9A-C13A  | 179.9(4)  |
| N1-C1-N2-C16    | 179.3(7)  | C5A-C6A-C7A-C8A   | 0.1(7)    |
| N1-C4-C5-C6     | -177.9(9) | C6A-C5A-C10A-C11A | -57(6)    |
| N1-C4-C5-C10    | 2.1(9)    | C6A-C5A-C10A-C12A | 64(7)     |
| N1-C4-C9-C8     | 178.0(9)  | C6A-C7A-C8A-C9A   | -0.2(10)  |
| N1-C4-C9-C13    | -2.7(11)  | C7A-C8A-C9A-C4A   | 0.1(10)   |
| N1-C4A-C5A-C6A  | -180(2)   | C7A-C8A-C9A-C13A  | -179.8(7) |
| N1-C4A-C5A-C10A | 0(2)      | C8A-C9A-C13A-C14A | 96(3)     |
| N1-C4A-C9A-C8A  | 179(3)    | C8A-C9A-C13A-C15A | -23(3)    |
| N1-C4A-C9A-C13A | -1(3)     | C9A-C4A-C5A-C6A   | 0.0(3)    |
| C1-N1-C3-C2     | -1.1(9)   | C9A-C4A-C5A-C10A  | 180.0(4)  |
| C1-N1-C4-C5     | -86.7(10) | C10A-C5A-C6A-C7A  | -180.0(4) |

|                  |            |                     |           |
|------------------|------------|---------------------|-----------|
| C1-N1-C4-C9      | 95.4(10)   | C16-N2-C2-C3        | -179.9(7) |
| C1-N1-C4A-C5A    | -79(2)     | C16-C17-C18-C19     | 0.1(3)    |
| C1-N1-C4A-C9A    | 102(2)     | C16-C17-C22-C23     | -170(2)   |
| C1-N2-C2-C3      | -0.7(9)    | C16-C17-C22-C24     | 64(3)     |
| C1-N2-C16-C17    | 81.3(13)   | C16-C21-C25-C26     | 115.0(19) |
| C1-N2-C16-C21    | -101.2(12) | C16-C21-C25-C27     | -117(2)   |
| C1-N2-C16-C17A   | 89.1(19)   | C16-C17A-C18A-C19A  | 0.1(3)    |
| C1-N2-C16-C21A   | -89.2(14)  | C16-C17A-C22A-C23A  | -114(3)   |
| N2-C2-C3-N1      | 1.1(9)     | C16-C17A-C22A-C24A  | 129(3)    |
| N2-C16-C17-C18   | 177.5(8)   | C16-C21A-C25A-C26A  | 112(3)    |
| N2-C16-C17-C22   | 5(3)       | C16-C21A-C25A-C27A  | -125(3)   |
| N2-C16-C21-C20   | -177.3(9)  | C17-C16-C21-C20     | 0.0(7)    |
| N2-C16-C21-C25   | 1(2)       | C17-C16-C21-C25     | 179(2)    |
| N2-C16-C17A-C18A | -178.1(13) | C17-C18-C19-C20     | -0.2(7)   |
| N2-C16-C17A-C22A | -8(4)      | C18-C17-C22-C23     | 17(3)     |
| N2-C16-C21A-C20A | 178.3(13)  | C18-C17-C22-C24     | -108(2)   |
| N2-C16-C21A-C25A | -5(3)      | C18-C19-C20-C21     | 0.2(9)    |
| C2-N2-C16-C17    | -99.6(13)  | C19-C20-C21-C16     | -0.1(9)   |
| C2-N2-C16-C21    | 77.9(13)   | C19-C20-C21-C25     | -179(2)   |
| C2-N2-C16-C17A   | -92(2)     | C20-C21-C25-C26     | -66.4(19) |
| C2-N2-C16-C21A   | 89.9(15)   | C20-C21-C25-C27     | 61(2)     |
| C3-N1-C1-Au1     | -176.7(6)  | C21-C16-C17-C18     | 0.0(3)    |
| C3-N1-C1-N2      | 0.6(9)     | C21-C16-C17-C22     | -173(3)   |
| C3-N1-C4-C5      | 91.7(10)   | C22-C17-C18-C19     | 174(2)    |
| C3-N1-C4-C9      | -86.1(11)  | C17A-C16-C21A-C20A  | 0.0(7)    |
| C3-N1-C4A-C5A    | 95.1(17)   | C17A-C16-C21A-C25A  | 177(3)    |
| C3-N1-C4A-C9A    | -84(3)     | C17A-C18A-C19A-C20A | -0.2(7)   |
| C4-N1-C1-Au1     | 1.9(16)    | C18A-C17A-C22A-C23A | 54(3)     |
| C4-N1-C1-N2      | 179.2(12)  | C18A-C17A-C22A-C24A | -63(3)    |
| C4-N1-C3-C2      | -179.7(12) | C18A-C19A-C20A-C21A | 0.2(10)   |
| C4-C5-C6-C7      | -0.1(3)    | C19A-C20A-C21A-C16  | -0.1(9)   |
| C4-C5-C10-C11    | 113.3(17)  | C19A-C20A-C21A-C25A | -177(3)   |
| C4-C5-C10-C12    | -122(3)    | C20A-C21A-C25A-C26A | -72(3)    |
| C4-C9-C13-C14    | -91.8(12)  | C20A-C21A-C25A-C27A | 52(3)     |
| C4-C9-C13-C15    | 145.6(11)  | C21A-C16-C17A-C18A  | 0.0(3)    |
| C5-C4-C9-C8      | 0.2(6)     | C21A-C16-C17A-C22A  | 170(3)    |
| C5-C4-C9-C13     | 179.5(4)   | C22A-C17A-C18A-C19A | -168(3)   |
| C5-C6-C7-C8      | 0.4(7)     | C28-C29-C30A-C31A   | 168(10)   |
| C6-C5-C10-C11    | -66.7(17)  | C28-C29-C30A-N3A    | -12(13)   |
| C6-C5-C10-C12    | 58(3)      | C29-C30-C31-C32     | 177.0(13) |

|                   |           |                     |            |
|-------------------|-----------|---------------------|------------|
| C6-C7-C8-C9       | -0.4(9)   | C29-C30-N3-C34      | -176.8(13) |
| C7-C8-C9-C4       | 0.1(9)    | C29-C30A-C31A-C32A  | -180(3)    |
| C7-C8-C9-C13      | -179.2(6) | C29-C30A-N3A-C34A   | 180(4)     |
| C8-C9-C13-C14     | 87.5(12)  | C30-C31-C32-C33     | 0.1(3)     |
| C8-C9-C13-C15     | -35.1(13) | C31-C30-N3-C34      | 0.3(7)     |
| C9-C4-C5-C6       | -0.2(3)   | C31-C32-C33-C34     | -0.3(6)    |
| C9-C4-C5-C10      | 179.8(4)  | C32-C33-C34-N3      | 0.5(9)     |
| C10-C5-C6-C7      | 179.9(4)  | C33-C34-N3-C30      | -0.5(9)    |
| C4A-N1-C1-Au1     | -2(3)     | N3-C30-C31-C32      | -0.1(3)    |
| C4A-N1-C1-N2      | 175(3)    | C30A-C31A-C32A-C33A | 0.0(3)     |
| C4A-N1-C3-C2      | -176(3)   | C31A-C30A-N3A-C34A  | -0.1(8)    |
| C4A-C5A-C6A-C7A   | 0.0(3)    | C31A-C32A-C33A-C34A | 0.1(7)     |
| C4A-C5A-C10A-C11A | 123(6)    | C32A-C33A-C34A-N3A  | -0.1(10)   |
| C4A-C5A-C10A-C12A | -116(7)   | C33A-C34A-N3A-C30A  | 0.1(10)    |
| C4A-C9A-C13A-C14A | -84(3)    | N3A-C30A-C31A-C32A  | 0.0(4)     |
| Au2-C35-N5-C36    | -173.4(7) | C42-C43-C47-C49     | 60.1(12)   |
| Au2-C35-N5-C50    | 2.4(12)   | C43-C38-C39-C40     | -0.2(14)   |
| N4-C35-N5-C36     | 1.0(9)    | C43-C38-C39-C44     | -172.8(14) |
| N4-C35-N5-C50     | 176.9(7)  | C43-C38-C39-C44A    | 172.5(15)  |
| N4-C38-C39-C40    | 178.4(8)  | C44-C39-C40-C41     | 172.0(14)  |
| N4-C38-C39-C44    | 5.8(16)   | C44A-C39-C40-C41    | -173.6(14) |
| N4-C38-C39-C44A   | -8.8(18)  | C50-N5-C36-C37      | -176.3(8)  |
| N4-C38-C43-C42    | -177.8(8) | C50-C51-C52-C53     | 0.0(13)    |
| N4-C38-C43-C47    | 2.2(13)   | C50-C51-C56-C57     | 149.0(8)   |
| C35-N4-C37-C36    | 0.5(10)   | C50-C51-C56-C58     | -87.4(9)   |
| C35-N4-C38-C39    | -94.5(9)  | C50-C55-C59-C60     | -122.8(15) |
| C35-N4-C38-C43    | 84.2(11)  | C50-C55-C59-C61     | 116.3(15)  |
| C35-N5-C36-C37    | -0.8(10)  | C50-C55-C59A-C60A   | -130(4)    |
| C35-N5-C50-C51    | 94.3(9)   | C50-C55-C59A-C61A   | 97(6)      |
| C35-N5-C50-C55    | -87.8(9)  | C51-C50-C55-C54     | -3.0(12)   |
| N5-C36-C37-N4     | 0.2(10)   | C51-C50-C55-C59     | -178.5(12) |
| N5-C50-C51-C52    | 179.8(7)  | C51-C50-C55-C59A    | 175(3)     |
| N5-C50-C51-C56    | -3.6(12)  | C51-C52-C53-C54     | -1.1(14)   |
| N5-C50-C55-C54    | 179.2(7)  | C52-C51-C56-C57     | -34.5(11)  |
| N5-C50-C55-C59    | 3.7(14)   | C52-C51-C56-C58     | 89.0(10)   |
| N5-C50-C55-C59A   | -3(3)     | C52-C53-C54-C55     | 0.1(14)    |
| C36-N5-C50-C51    | -90.5(10) | C53-C54-C55-C50     | 1.8(12)    |
| C36-N5-C50-C55    | 87.4(10)  | C53-C54-C55-C59     | 177.3(12)  |
| C37-N4-C35-Au2    | 174.0(6)  | C53-C54-C55-C59A    | -177(2)    |
| C37-N4-C35-N5     | -0.9(9)   | C54-C55-C59-C60     | 62(2)      |

|                   |            |                     |            |
|-------------------|------------|---------------------|------------|
| C37-N4-C38-C39    | 85.2(11)   | C54-C55-C59-C61     | -59.0(19)  |
| C37-N4-C38-C43    | -96.1(10)  | C54-C55-C59A-C60A   | 48(5)      |
| C38-N4-C35-Au2    | -6.2(11)   | C54-C55-C59A-C61A   | -85(6)     |
| C38-N4-C35-N5     | 178.8(7)   | C55-C50-C51-C52     | 2.0(12)    |
| C38-N4-C37-C36    | -179.2(8)  | C55-C50-C51-C56     | 178.6(8)   |
| C38-C39-C40-C41   | -0.1(14)   | C56-C51-C52-C53     | -176.6(8)  |
| C38-C39-C44-C45   | 104(2)     | C63-C64-C65-C66     | 172.2(12)  |
| C38-C39-C44-C46   | -133(2)    | C63-C64-N6-C68      | -175.2(12) |
| C38-C39-C44A-C45A | 125(2)     | C64-C65-C66-C67     | 2(2)       |
| C38-C39-C44A-C46A | -106(3)    | C65-C64-N6-C68      | 0(2)       |
| C38-C43-C47-C48   | 114.4(11)  | C65-C66-C67-C68     | 1(3)       |
| C38-C43-C47-C49   | -119.8(10) | C66-C67-C68-N6      | -4(3)      |
| C39-C38-C43-C42   | 0.9(14)    | C67-C68-N6-C64      | 3(3)       |
| C39-C38-C43-C47   | -179.2(9)  | N6-C64-C65-C66      | -3(2)      |
| C39-C40-C41-C42   | -0.3(15)   | C63A-C64A-C65A-C66A | -176(4)    |
| C40-C39-C44-C45   | -68(2)     | C63A-C64A-N6A-C68A  | -179(3)    |
| C40-C39-C44-C46   | 54(3)      | C64A-C65A-C66A-C67A | -7(7)      |
| C40-C39-C44A-C45A | -62(3)     | C65A-C64A-N6A-C68A  | -5(6)      |
| C40-C39-C44A-C46A | 67(3)      | C65A-C66A-C67A-C68A | -1(8)      |
| C40-C41-C42-C43   | 0.9(15)    | C66A-C67A-C68A-N6A  | 7(8)       |
| C41-C42-C43-C38   | -1.2(14)   | C67A-C68A-N6A-C64A  | -3(6)      |
| C41-C42-C43-C47   | 178.9(9)   | N6A-C64A-C65A-C66A  | 10(7)      |
| C42-C43-C47-C48   | -65.7(13)  |                     |            |

## The crystal structure of **4a**

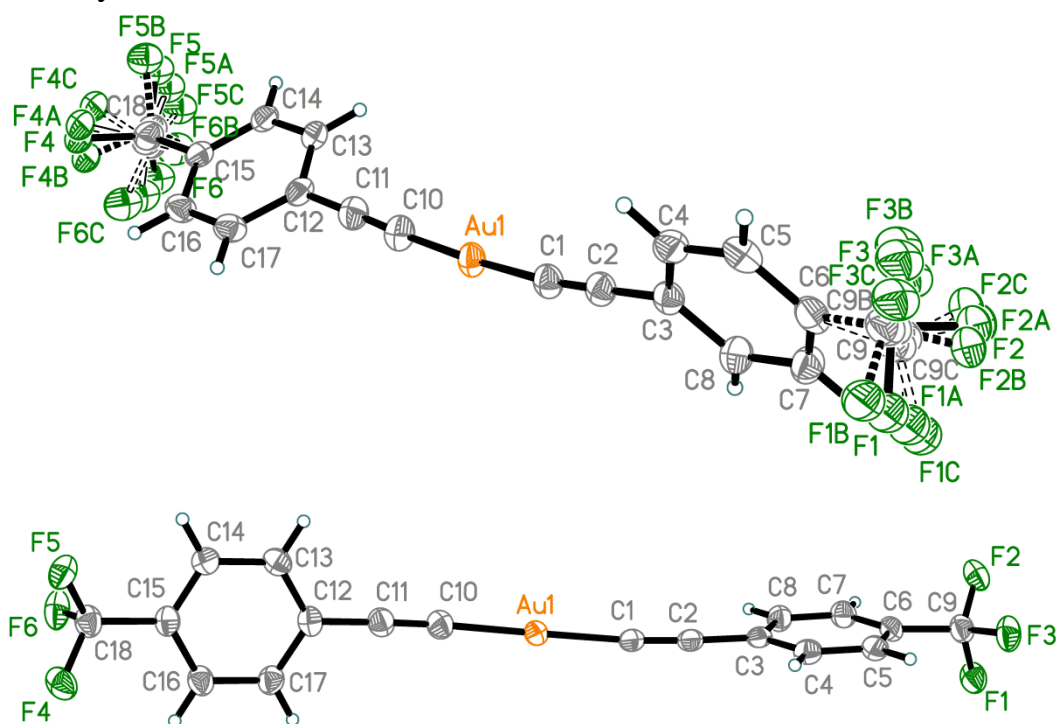

**Figure S68.** The structure of the complex anion in compound **4a** (with disorder – top, and without disorder – bottom). Thermal ellipsoids are shown at a 50% probability level. Hydrogen atoms are drawn as fixed-size spheres. Both CF<sub>3</sub> groups are disordered over four positions with disorder ratios of 0.430(3) : 0.306(3) : 0.207(3) : 0.057(3) for atoms C9, F1..F3 / C9A, F1A..F3A / C9B, F1B..F3B / C9C, F1C..F3C and 0.307(3) : 0.453(3) : 0.116(3) : 0.124(3) for atoms F4..F6 / F4A..F6A / F4B..F6B / F4C..F6C.

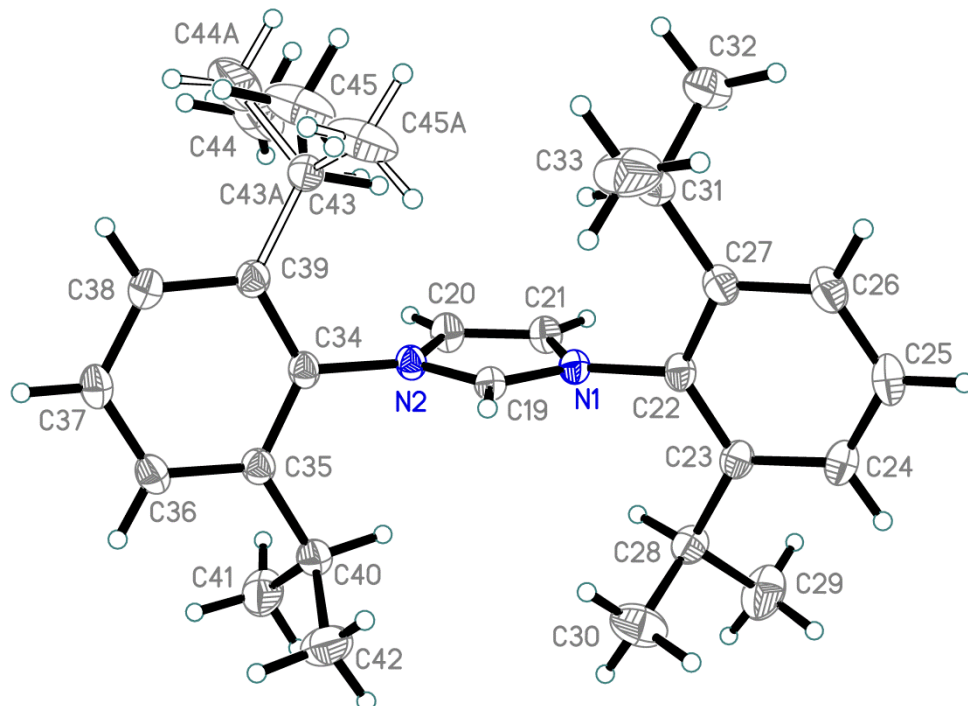

**Figure S69.** The structure of the cation in compound **4a**. Thermal ellipsoids are shown at a 50% probability level. Hydrogen atoms are drawn as fixed-size spheres. The minor component of disorder of an *iso*-propyl group is drawn with open solid lines. The disorder ratio for atoms C43..C45 / C43A..C45A) is 0.880(5) : 0.120(5).

**Table S22.** Selected bond lengths (Å) for **4a**.

|         |          |          |          |           |          |
|---------|----------|----------|----------|-----------|----------|
| Au1-C1  | 1.980(2) | C12-C13  | 1.399(3) | C20-C21   | 1.352(3) |
| Au1-C10 | 1.977(2) | C12-C17  | 1.405(3) | C22-C23   | 1.400(3) |
| C1-C2   | 1.213(3) | C13-C14  | 1.386(3) | C22-C27   | 1.401(3) |
| C2-C3   | 1.436(3) | C14-C15  | 1.386(3) | C23-C24   | 1.397(3) |
| C3-C4   | 1.397(3) | C15-C16  | 1.389(3) | C23-C28   | 1.521(3) |
| C3-C8   | 1.399(3) | C15-C18A | 1.498(3) | C24-C25   | 1.388(3) |
| C4-C5   | 1.383(3) | C15-C18  | 1.498(3) | C25-C26   | 1.381(3) |
| C5-C6   | 1.381(3) | C15-C18C | 1.498(3) | C26-C27   | 1.392(3) |
| C6-C7   | 1.390(3) | C15-C18B | 1.499(3) | C27-C31   | 1.518(3) |
| C6-C9B  | 1.499(3) | C16-C17  | 1.384(3) | C28-C29   | 1.522(3) |
| C6-C9C  | 1.499(3) | C18-F6   | 1.350(2) | C28-C30   | 1.532(3) |
| C6-C9   | 1.499(3) | C18-F5   | 1.350(2) | C31-C33   | 1.530(3) |
| C6-C9A  | 1.499(3) | C18-F4   | 1.351(2) | C31-C32   | 1.530(3) |
| C7-C8   | 1.386(3) | C18A-F5A | 1.349(2) | C34-C35   | 1.395(3) |
| C9-F3   | 1.349(2) | C18A-F6A | 1.350(2) | C34-C39   | 1.398(3) |
| C9-F2   | 1.350(2) | C18A-F4A | 1.352(2) | C35-C36   | 1.399(3) |
| C9-F1   | 1.351(2) | C18B-F6B | 1.350(2) | C35-C40   | 1.518(3) |
| C9A-F3A | 1.350(2) | C18B-F5B | 1.351(2) | C36-C37   | 1.382(3) |
| C9A-F2A | 1.350(2) | C18B-F4B | 1.351(2) | C37-C38   | 1.384(3) |
| C9A-F1A | 1.351(2) | C18C-F5C | 1.350(2) | C38-C39   | 1.398(3) |
| C9B-F3B | 1.349(2) | C18C-F6C | 1.350(2) | C39-C43   | 1.520(3) |
| C9B-F2B | 1.350(2) | C18C-F4C | 1.351(2) | C39-C43A  | 1.520(4) |
| C9B-F1B | 1.350(2) | N1-C19   | 1.334(2) | C40-C41   | 1.527(3) |
| C9C-F3C | 1.350(2) | N1-C21   | 1.384(2) | C40-C42   | 1.531(3) |
| C9C-F2C | 1.350(2) | N1-C22   | 1.450(2) | C43-C44   | 1.523(3) |
| C9C-F1C | 1.350(2) | C19-N2   | 1.332(2) | C43-C45   | 1.523(3) |
| C10-C11 | 1.216(3) | N2-C20   | 1.384(2) | C43A-C45A | 1.523(4) |
| C11-C12 | 1.431(3) | N2-C34   | 1.451(2) | C43A-C44A | 1.523(4) |

**Table S23.** Selected bond angles (°) for **4a**.

|            |            |              |           |
|------------|------------|--------------|-----------|
| C10-Au1-C1 | 176.58(9)  | F5A-C18A-F4A | 107.3(6)  |
| C2-C1-Au1  | 174.84(19) | F6A-C18A-F4A | 106.7(5)  |
| C1-C2-C3   | 177.3(2)   | F5A-C18A-C15 | 112.3(3)  |
| C4-C3-C8   | 118.90(19) | F6A-C18A-C15 | 112.0(4)  |
| C4-C3-C2   | 121.22(19) | F4A-C18A-C15 | 112.4(7)  |
| C8-C3-C2   | 119.86(19) | F6B-C18B-F5B | 104.3(9)  |
| C5-C4-C3   | 120.8(2)   | F6B-C18B-F4B | 103.9(10) |



|             |            |              |            |
|-------------|------------|--------------|------------|
| C6-C5-C4    | 119.8(2)   | F5B-C18B-F4B | 108.1(9)   |
| C5-C6-C7    | 120.34(19) | F6B-C18B-C15 | 113.0(8)   |
| C5-C6-C9B   | 114.0(6)   | F5B-C18B-C15 | 114.8(10)  |
| C7-C6-C9B   | 125.3(6)   | F4B-C18B-C15 | 111.9(10)  |
| C5-C6-C9C   | 129.2(11)  | F5C-C18C-F6C | 110.0(11)  |
| C7-C6-C9C   | 110.2(11)  | F5C-C18C-F4C | 107.0(10)  |
| C5-C6-C9    | 117.8(3)   | F6C-C18C-F4C | 103.3(10)  |
| C7-C6-C9    | 121.8(3)   | F5C-C18C-C15 | 116.2(11)  |
| C5-C6-C9A   | 129.6(5)   | F6C-C18C-C15 | 113.0(12)  |
| C7-C6-C9A   | 110.0(4)   | F4C-C18C-C15 | 106.3(10)  |
| C8-C7-C6    | 120.0(2)   | C19-N1-C21   | 108.94(15) |
| C7-C8-C3    | 120.1(2)   | C19-N1-C22   | 125.12(15) |
| F3-C9-F2    | 106.1(7)   | C21-N1-C22   | 125.59(15) |
| F3-C9-F1    | 106.3(5)   | N2-C19-N1    | 108.26(15) |
| F2-C9-F1    | 106.1(5)   | C19-N2-C20   | 108.84(15) |
| F3-C9-C6    | 116.3(8)   | C19-N2-C34   | 123.93(15) |
| F2-C9-C6    | 111.1(5)   | C20-N2-C34   | 127.21(15) |
| F1-C9-C6    | 110.3(4)   | C21-C20-N2   | 107.12(16) |
| F3A-C9A-F2A | 106.9(9)   | C20-C21-N1   | 106.84(16) |
| F3A-C9A-F1A | 105.7(8)   | C23-C22-C27  | 124.14(17) |
| F2A-C9A-F1A | 105.9(8)   | C23-C22-N1   | 118.81(16) |
| F3A-C9A-C6  | 107.6(11)  | C27-C22-N1   | 117.04(17) |
| F2A-C9A-C6  | 116.0(9)   | C24-C23-C22  | 116.45(18) |
| F1A-C9A-C6  | 114.1(7)   | C24-C23-C28  | 121.58(18) |
| F3B-C9B-F2B | 107.0(11)  | C22-C23-C28  | 121.95(17) |
| F3B-C9B-F1B | 108.5(11)  | C25-C24-C23  | 121.01(19) |
| F2B-C9B-F1B | 107.2(9)   | C26-C25-C24  | 120.57(19) |
| F3B-C9B-C6  | 113.4(16)  | C25-C26-C27  | 121.29(19) |
| F2B-C9B-C6  | 110.0(10)  | C26-C27-C22  | 116.52(19) |
| F1B-C9B-C6  | 110.4(11)  | C26-C27-C31  | 120.67(18) |
| F3C-C9C-F2C | 107.6(15)  | C22-C27-C31  | 122.80(17) |
| F3C-C9C-F1C | 106.9(14)  | C23-C28-C29  | 112.62(18) |
| F2C-C9C-F1C | 105.9(14)  | C23-C28-C30  | 110.94(17) |
| F3C-C9C-C6  | 109(2)     | C29-C28-C30  | 110.7(2)   |
| F2C-C9C-C6  | 103(3)     | C27-C31-C33  | 110.2(2)   |
| F1C-C9C-C6  | 124(3)     | C27-C31-C32  | 112.00(18) |
| C11-C10-Au1 | 173.6(2)   | C33-C31-C32  | 111.32(19) |
| C10-C11-C12 | 178.5(3)   | C35-C34-C39  | 124.69(17) |
| C13-C12-C17 | 118.39(19) | C35-C34-N2   | 117.69(16) |
| C13-C12-C11 | 121.7(2)   | C39-C34-N2   | 117.62(16) |

|              |            |                |            |
|--------------|------------|----------------|------------|
| C17-C12-C11  | 119.9(2)   | C34-C35-C36    | 116.49(18) |
| C14-C13-C12  | 120.8(2)   | C34-C35-C40    | 122.89(16) |
| C15-C14-C13  | 119.76(19) | C36-C35-C40    | 120.61(17) |
| C14-C15-C16  | 120.50(18) | C37-C36-C35    | 120.70(18) |
| C14-C15-C18A | 123.0(2)   | C36-C37-C38    | 120.97(18) |
| C16-C15-C18A | 116.5(2)   | C37-C38-C39    | 121.08(18) |
| C14-C15-C18  | 120.0(4)   | C38-C39-C34    | 116.04(17) |
| C16-C15-C18  | 119.5(4)   | C38-C39-C43    | 121.3(2)   |
| C14-C15-C18C | 121.4(5)   | C34-C39-C43    | 122.6(2)   |
| C16-C15-C18C | 117.7(6)   | C38-C39-C43A   | 120.3(11)  |
| C14-C15-C18B | 115.0(5)   | C34-C39-C43A   | 123.6(10)  |
| C16-C15-C18B | 124.5(5)   | C35-C40-C41    | 110.34(17) |
| C17-C16-C15  | 119.7(2)   | C35-C40-C42    | 111.15(17) |
| C16-C17-C12  | 120.7(2)   | C41-C40-C42    | 111.9(2)   |
| F6-C18-F5    | 107.9(6)   | C39-C43-C44    | 110.3(2)   |
| F6-C18-F4    | 106.6(8)   | C39-C43-C45    | 112.3(2)   |
| F5-C18-F4    | 103.3(7)   | C44-C43-C45    | 110.6(3)   |
| F6-C18-C15   | 111.9(7)   | C39-C43A-C45A  | 114.9(14)  |
| F5-C18-C15   | 113.2(5)   | C39-C43A-C44A  | 114.2(15)  |
| F4-C18-C15   | 113.3(11)  | C45A-C43A-C44A | 108.4(15)  |
| F5A-C18A-F6A | 105.7(4)   |                |            |

**Table S24.** Torsion angles (°) for **4a**.

|              |             |                  |             |
|--------------|-------------|------------------|-------------|
| C8-C3-C4-C5  | -1.1(3)     | C14-C15-C18C-F5C | 10.0(14)    |
| C2-C3-C4-C5  | -179.42(19) | C16-C15-C18C-F5C | -162.8(9)   |
| C3-C4-C5-C6  | 1.0(3)      | C14-C15-C18C-F6C | 138.5(9)    |
| C4-C5-C6-C7  | -0.2(3)     | C16-C15-C18C-F6C | -34.3(12)   |
| C4-C5-C6-C9B | -173.2(6)   | C14-C15-C18C-F4C | -108.9(9)   |
| C4-C5-C6-C9C | -173.5(17)  | C16-C15-C18C-F4C | 78.3(10)    |
| C4-C5-C6-C9  | -177.1(3)   | C21-N1-C19-N2    | 0.7(2)      |
| C4-C5-C6-C9A | 178.4(5)    | C22-N1-C19-N2    | 174.15(16)  |
| C5-C6-C7-C8  | -0.4(3)     | N1-C19-N2-C20    | -0.4(2)     |
| C9B-C6-C7-C8 | 171.8(6)    | N1-C19-N2-C34    | -178.89(16) |
| C9C-C6-C7-C8 | 174.1(14)   | C19-N2-C20-C21   | -0.1(2)     |
| C9-C6-C7-C8  | 176.4(3)    | C34-N2-C20-C21   | 178.39(18)  |
| C9A-C6-C7-C8 | -179.2(4)   | N2-C20-C21-N1    | 0.5(2)      |
| C6-C7-C8-C3  | 0.2(3)      | C19-N1-C21-C20   | -0.7(2)     |
| C4-C3-C8-C7  | 0.5(3)      | C22-N1-C21-C20   | -174.15(17) |
| C2-C3-C8-C7  | 178.8(2)    | C19-N1-C22-C23   | 101.5(2)    |

|                  |            |                  |             |
|------------------|------------|------------------|-------------|
| C5-C6-C9-F3      | -13.5(8)   | C21-N1-C22-C23   | -86.0(2)    |
| C7-C6-C9-F3      | 169.7(7)   | C19-N1-C22-C27   | -79.3(2)    |
| C5-C6-C9-F2      | -135.1(6)  | C21-N1-C22-C27   | 93.1(2)     |
| C7-C6-C9-F2      | 48.1(7)    | C27-C22-C23-C24  | 1.5(3)      |
| C5-C6-C9-F1      | 107.6(5)   | N1-C22-C23-C24   | -179.40(16) |
| C7-C6-C9-F1      | -69.3(6)   | C27-C22-C23-C28  | -179.70(18) |
| C5-C6-C9A-F3A    | -3.1(11)   | N1-C22-C23-C28   | -0.6(3)     |
| C7-C6-C9A-F3A    | 175.6(8)   | C22-C23-C24-C25  | -0.6(3)     |
| C5-C6-C9A-F2A    | -122.7(10) | C28-C23-C24-C25  | -179.39(19) |
| C7-C6-C9A-F2A    | 56.0(10)   | C23-C24-C25-C26  | -0.6(3)     |
| C5-C6-C9A-F1A    | 113.7(7)   | C24-C25-C26-C27  | 1.1(3)      |
| C7-C6-C9A-F1A    | -67.5(8)   | C25-C26-C27-C22  | -0.2(3)     |
| C5-C6-C9B-F3B    | -30.5(12)  | C25-C26-C27-C31  | 178.95(19)  |
| C7-C6-C9B-F3B    | 156.9(12)  | C23-C22-C27-C26  | -1.1(3)     |
| C5-C6-C9B-F2B    | -150.3(8)  | N1-C22-C27-C26   | 179.80(17)  |
| C7-C6-C9B-F2B    | 37.1(12)   | C23-C22-C27-C31  | 179.71(18)  |
| C5-C6-C9B-F1B    | 91.6(10)   | N1-C22-C27-C31   | 0.6(3)      |
| C7-C6-C9B-F1B    | -81.1(11)  | C24-C23-C28-C29  | -33.1(3)    |
| C5-C6-C9C-F3C    | 1(3)       | C22-C23-C28-C29  | 148.2(2)    |
| C7-C6-C9C-F3C    | -172.7(17) | C24-C23-C28-C30  | 91.7(2)     |
| C5-C6-C9C-F2C    | -113(2)    | C22-C23-C28-C30  | -87.0(2)    |
| C7-C6-C9C-F2C    | 73.4(17)   | C26-C27-C31-C33  | -70.6(3)    |
| C5-C6-C9C-F1C    | 128(2)     | C22-C27-C31-C33  | 108.5(2)    |
| C7-C6-C9C-F1C    | -46(2)     | C26-C27-C31-C32  | 53.9(3)     |
| C17-C12-C13-C14  | -1.6(3)    | C22-C27-C31-C32  | -127.0(2)   |
| C11-C12-C13-C14  | 178.86(19) | C19-N2-C34-C35   | -82.7(2)    |
| C12-C13-C14-C15  | 1.0(3)     | C20-N2-C34-C35   | 99.1(2)     |
| C13-C14-C15-C16  | 0.3(3)     | C19-N2-C34-C39   | 96.6(2)     |
| C13-C14-C15-C18A | -178.1(3)  | C20-N2-C34-C39   | -81.6(2)    |
| C13-C14-C15-C18  | 179.6(4)   | C39-C34-C35-C36  | -2.2(3)     |
| C13-C14-C15-C18C | -172.3(7)  | N2-C34-C35-C36   | 177.04(16)  |
| C13-C14-C15-C18B | 177.5(5)   | C39-C34-C35-C40  | 176.49(18)  |
| C14-C15-C16-C17  | -0.9(3)    | N2-C34-C35-C40   | -4.3(3)     |
| C18A-C15-C16-C17 | 177.5(3)   | C34-C35-C36-C37  | 0.7(3)      |
| C18-C15-C16-C17  | 179.7(4)   | C40-C35-C36-C37  | -178.01(18) |
| C18C-C15-C16-C17 | 171.9(7)   | C35-C36-C37-C38  | 0.5(3)      |
| C18B-C15-C16-C17 | -177.9(6)  | C36-C37-C38-C39  | -0.4(3)     |
| C15-C16-C17-C12  | 0.3(3)     | C37-C38-C39-C34  | -0.9(3)     |
| C13-C12-C17-C16  | 1.0(3)     | C37-C38-C39-C43  | 176.14(19)  |
| C11-C12-C17-C16  | -179.5(2)  | C37-C38-C39-C43A | -178.7(9)   |

|                  |            |                   |             |
|------------------|------------|-------------------|-------------|
| C14-C15-C18-F6   | 96.5(6)    | C35-C34-C39-C38   | 2.3(3)      |
| C16-C15-C18-F6   | -84.2(8)   | N2-C34-C39-C38    | -176.95(16) |
| C14-C15-C18-F5   | -25.7(9)   | C35-C34-C39-C43   | -174.72(19) |
| C16-C15-C18-F5   | 153.6(6)   | N2-C34-C39-C43    | 6.0(3)      |
| C14-C15-C18-F4   | -143.0(7)  | C35-C34-C39-C43A  | 180.0(10)   |
| C16-C15-C18-F4   | 36.3(8)    | N2-C34-C39-C43A   | 0.7(10)     |
| C14-C15-C18A-F5A | -5.3(6)    | C34-C35-C40-C41   | -119.9(2)   |
| C16-C15-C18A-F5A | 176.2(4)   | C36-C35-C40-C41   | 58.7(2)     |
| C14-C15-C18A-F6A | 113.5(4)   | C34-C35-C40-C42   | 115.4(2)    |
| C16-C15-C18A-F6A | -65.0(5)   | C36-C35-C40-C42   | -66.0(3)    |
| C14-C15-C18A-F4A | -126.4(4)  | C38-C39-C43-C44   | -66.3(3)    |
| C16-C15-C18A-F4A | 55.2(5)    | C34-C39-C43-C44   | 110.5(3)    |
| C14-C15-C18B-F6B | 72.9(11)   | C38-C39-C43-C45   | 57.5(4)     |
| C16-C15-C18B-F6B | -110.0(10) | C34-C39-C43-C45   | -125.6(3)   |
| C14-C15-C18B-F5B | -46.5(11)  | C38-C39-C43A-C45A | 91(2)       |
| C16-C15-C18B-F5B | 130.6(9)   | C34-C39-C43A-C45A | -87(2)      |
| C14-C15-C18B-F4B | -170.2(8)  | C38-C39-C43A-C44A | -35(2)      |
| C16-C15-C18B-F4B | 6.9(11)    | C34-C39-C43A-C44A | 147.1(14)   |
